# Supplementary material for: Enantiomeric pairs of meroterpenoids with 11/5/6 spiro-heterocyclic systems from Hypericum kouytchense
Source: Royal Society of Chemistry journal article supplement (doi:10.1039/d2qo01485h), 2022-01-01

*Supporting Information for*

**Enantiomeric pairs of meroterpenoids with 11/5/6 spiro-  
heterocyclic systems from *Hypericum kouytchense***

Jin-Chang Huang,<sup>a,b</sup> Li Sheng,<sup>c</sup> Jian-Fa Zong,<sup>b</sup> Yu-Bo Zhou,<sup>c</sup> Jia Li,<sup>c</sup> and Ai-Jun Hou<sup>\*,a,b</sup>

<sup>a</sup> *School of Pharmacy, Shanghai Jiao Tong University, Shanghai, 200240, China*

<sup>b</sup> *School of Pharmacy, Fudan University, Shanghai, 201203, China*

<sup>c</sup> *National Center for Drug Screening, State Key Laboratory of Drug Research, Shanghai Institute of Materia Medica, Chinese Academy of Sciences, Shanghai, 201203, China*

---

\* E-mail: [ajhou@sjtu.edu.cn](mailto:ajhou@sjtu.edu.cn)

## Contents

|                                                                                                                                    |    |
|------------------------------------------------------------------------------------------------------------------------------------|----|
| <b>Table S1.</b> X-ray crystallographic data for (–)-hyperkouyitin A ( <b>1a</b> ). .....                                          | 1  |
| <b>Table S2.</b> X-ray crystallographic data for (+)-hyperkouyitin B ( <b>2b</b> ).....                                            | 2  |
| <b>Table S3.</b> X-ray crystallographic data for (+)-hyperkouyitin D ( <b>4b</b> ).....                                            | 3  |
| <b>Table S4.</b> X-ray crystallographic data for (+)-hyperkouyitin E ( <b>5b</b> ). .....                                          | 4  |
| <b>Table S5.</b> X-ray crystallographic data for (–)-hyperkouyitin F ( <b>6a</b> ).....                                            | 5  |
| <b>Scheme S1.</b> Hypothetical biosynthetic pathways for <b>1a/1b–6a/6b</b> .....                                                  | 6  |
| <b>Fig. S1.</b> Key <sup>1</sup> H- <sup>1</sup> H COSY and HMBC correlations of <b>2, 3, 5, and 6</b> .....                       | 7  |
| <b>Fig. S2.</b> Key NOESY correlations of <b>2, 3, 5, and 6</b> . .....                                                            | 7  |
| <b>Original Spectroscopic Data</b> .....                                                                                           | 8  |
| <b>Fig. S3.</b> Positive HR-ESIMS spectrum of hyperkouyitin A ( <b>1</b> ).....                                                    | 8  |
| <b>Fig. S4.</b> <sup>1</sup> H NMR (600 MHz, CDCl <sub>3</sub> ) spectrum of hyperkouyitin A ( <b>1</b> ).....                     | 8  |
| <b>Fig. S5.</b> <sup>1</sup> H NMR (600 MHz, CDCl <sub>3</sub> ) spectrum of hyperkouyitin A ( <b>1</b> ).....                     | 9  |
| <b>Fig. S6.</b> <sup>13</sup> C NMR and DEPT (150 MHz, CDCl <sub>3</sub> ) spectra of hyperkouyitin A ( <b>1</b> ). .....          | 9  |
| <b>Fig. S7.</b> <sup>13</sup> C NMR and DEPT (150 MHz, CDCl <sub>3</sub> ) spectra of hyperkouyitin A ( <b>1</b> ). .....          | 10 |
| <b>Fig. S8.</b> HSQC (600 MHz, CDCl <sub>3</sub> ) spectrum of hyperkouyitin A ( <b>1</b> ). .....                                 | 10 |
| <b>Fig. S9.</b> HSQC (600 MHz, CDCl <sub>3</sub> ) spectrum of hyperkouyitin A ( <b>1</b> ). .....                                 | 11 |
| <b>Fig. S10.</b> <sup>1</sup> H- <sup>1</sup> H COSY (600 MHz, CDCl <sub>3</sub> ) spectrum of hyperkouyitin A ( <b>1</b> ). ..... | 11 |
| <b>Fig. S11.</b> HMBC (600 MHz, CDCl <sub>3</sub> ) spectrum of hyperkouyitin A ( <b>1</b> ). .....                                | 12 |
| <b>Fig. S12.</b> HMBC (600 MHz, CDCl <sub>3</sub> ) spectrum of hyperkouyitin A ( <b>1</b> ). .....                                | 12 |
| <b>Fig. S13.</b> NOESY (600 MHz, CDCl <sub>3</sub> ) spectrum of hyperkouyitin A ( <b>1</b> ).....                                 | 13 |
| <b>Fig. S14.</b> IR spectrum of hyperkouyitin A ( <b>1</b> ). .....                                                                | 13 |
| <b>Fig. S15.</b> UV spectrum of hyperkouyitin A ( <b>1</b> ). .....                                                                | 14 |
| <b>Fig. S16.</b> Positive HR-ESIMS spectrum of hyperkouyitin B ( <b>2</b> ). .....                                                 | 14 |
| <b>Fig. S17.</b> <sup>1</sup> H NMR (600 MHz, CDCl <sub>3</sub> ) spectrum of hyperkouyitin B ( <b>2</b> ).....                    | 15 |
| <b>Fig. S18.</b> <sup>1</sup> H NMR (600 MHz, CDCl <sub>3</sub> ) spectrum of hyperkouyitin B ( <b>2</b> ).....                    | 15 |
| <b>Fig. S19.</b> <sup>13</sup> C NMR and DEPT (150 MHz, CDCl <sub>3</sub> ) spectra of hyperkouyitin B ( <b>2</b> ). .....         | 16 |
| <b>Fig. S20.</b> <sup>13</sup> C NMR and DEPT (150 MHz, CDCl <sub>3</sub> ) spectra of hyperkouyitin B ( <b>2</b> ). .....         | 16 |
| <b>Fig. S21.</b> HSQC (600 MHz, CDCl <sub>3</sub> ) spectrum of hyperkouyitin B ( <b>2</b> ). .....                                | 17 |
| <b>Fig. S22.</b> HSQC (600 MHz, CDCl <sub>3</sub> ) spectrum of hyperkouyitin B ( <b>2</b> ). .....                                | 17 |
| <b>Fig. S23.</b> <sup>1</sup> H- <sup>1</sup> H COSY (600 MHz, CDCl <sub>3</sub> ) spectrum of hyperkouyitin B ( <b>2</b> ).....   | 18 |

|                                                                                                                    |    |
|--------------------------------------------------------------------------------------------------------------------|----|
| <b>Fig. S24.</b> HMBC (600 MHz, CDCl <sub>3</sub> ) spectrum of hyperkouytin B (2).                                | 18 |
| <b>Fig. S25.</b> HMBC (600 MHz, CDCl <sub>3</sub> ) spectrum of hyperkouytin B (2).                                | 19 |
| <b>Fig. S26.</b> NOESY (600 MHz, CDCl <sub>3</sub> ) spectrum of hyperkouytin B (2).                               | 19 |
| <b>Fig. S27.</b> IR spectrum of hyperkouytin B (2).                                                                | 20 |
| <b>Fig. S28.</b> UV spectrum of hyperkouytin B (2).                                                                | 20 |
| <b>Fig. S29.</b> Positive HR-ESIMS spectrum of hyperkouytin C (3).                                                 | 21 |
| <b>Fig. S30.</b> <sup>1</sup> H NMR (600 MHz, CDCl <sub>3</sub> ) spectrum of hyperkouytin C (3).                  | 21 |
| <b>Fig. S31.</b> <sup>1</sup> H NMR (600 MHz, CDCl <sub>3</sub> ) spectrum of hyperkouytin C (3).                  | 22 |
| <b>Fig. S32.</b> <sup>13</sup> C NMR and DEPT (150 MHz, CDCl <sub>3</sub> ) spectra of hyperkouytin C (3).         | 22 |
| <b>Fig. S33.</b> <sup>13</sup> C NMR and DEPT (150 MHz, CDCl <sub>3</sub> ) spectra of hyperkouytin C (3).         | 23 |
| <b>Fig. S34.</b> HSQC (600 MHz, CDCl <sub>3</sub> ) spectrum of hyperkouytin C (3).                                | 23 |
| <b>Fig. S35.</b> HSQC (600 MHz, CDCl <sub>3</sub> ) spectrum of hyperkouytin C (3).                                | 24 |
| <b>Fig. S36.</b> <sup>1</sup> H- <sup>1</sup> H COSY (600 MHz, CDCl <sub>3</sub> ) spectrum of hyperkouytin C (3). | 24 |
| <b>Fig. S37.</b> HMBC (600 MHz, CDCl <sub>3</sub> ) spectrum of hyperkouytin C (3).                                | 25 |
| <b>Fig. S38.</b> HMBC (600 MHz, CDCl <sub>3</sub> ) spectrum of hyperkouytin C (3).                                | 25 |
| <b>Fig. S39.</b> NOESY (600 MHz, CDCl <sub>3</sub> ) spectrum of hyperkouytin C (3).                               | 26 |
| <b>Fig. S40.</b> IR spectrum of hyperkouytin C (3).                                                                | 26 |
| <b>Fig. S41.</b> UV spectrum of hyperkouytin C (3).                                                                | 27 |
| <b>Fig. S42.</b> Positive HR-ESIMS spectrum of hyperkouytin D (4).                                                 | 27 |
| <b>Fig. S43.</b> <sup>1</sup> H NMR (600 MHz, CDCl <sub>3</sub> ) spectrum of hyperkouytin D (4).                  | 28 |
| <b>Fig. S44.</b> <sup>1</sup> H NMR (600 MHz, CDCl <sub>3</sub> ) spectrum of hyperkouytin D (4).                  | 28 |
| <b>Fig. S45.</b> <sup>13</sup> C NMR and DEPT (150 MHz, CDCl <sub>3</sub> ) spectra of hyperkouytin D (4).         | 29 |
| <b>Fig. S46.</b> <sup>13</sup> C NMR and DEPT (150 MHz, CDCl <sub>3</sub> ) spectra of hyperkouytin D (4).         | 29 |
| <b>Fig. S47.</b> HSQC (600 MHz, CDCl <sub>3</sub> ) spectrum of hyperkouytin D (4).                                | 30 |
| <b>Fig. S48.</b> HSQC (600 MHz, CDCl <sub>3</sub> ) spectrum of hyperkouytin D (4).                                | 30 |
| <b>Fig. S49.</b> <sup>1</sup> H- <sup>1</sup> H COSY (600 MHz, CDCl <sub>3</sub> ) spectrum of hyperkouytin D (4). | 31 |
| <b>Fig. S50.</b> HMBC (600 MHz, CDCl <sub>3</sub> ) spectrum of hyperkouytin D (4).                                | 31 |
| <b>Fig. S51.</b> HMBC (600 MHz, CDCl <sub>3</sub> ) spectrum of hyperkouytin D (4).                                | 32 |
| <b>Fig. S52.</b> NOESY (600 MHz, CDCl <sub>3</sub> ) spectrum of hyperkouytin D (4).                               | 32 |
| <b>Fig. S53.</b> IR spectrum of hyperkouytin D (4).                                                                | 33 |
| <b>Fig. S54.</b> UV spectrum of hyperkouytin D (4).                                                                | 33 |

|                                                                                                                    |    |
|--------------------------------------------------------------------------------------------------------------------|----|
| <b>Fig. S55.</b> Positive HR-ESIMS spectrum of hyperkouytin E (5).                                                 | 34 |
| <b>Fig. S56.</b> <sup>1</sup> H NMR (600 MHz, CDCl <sub>3</sub> ) spectrum of hyperkouytin E (5).                  | 34 |
| <b>Fig. S57.</b> <sup>1</sup> H NMR (600 MHz, CDCl <sub>3</sub> ) spectrum of hyperkouytin E (5).                  | 35 |
| <b>Fig. S58.</b> <sup>13</sup> C NMR and DEPT (150 MHz, CDCl <sub>3</sub> ) spectra of hyperkouytin E (5).         | 35 |
| <b>Fig. S59.</b> <sup>13</sup> C NMR and DEPT (150 MHz, CDCl <sub>3</sub> ) spectra of hyperkouytin E (5).         | 36 |
| <b>Fig. S60.</b> HSQC (600 MHz, CDCl <sub>3</sub> ) spectrum of hyperkouytin E (5).                                | 36 |
| <b>Fig. S61.</b> HSQC (600 MHz, CDCl <sub>3</sub> ) spectrum of hyperkouytin E (5).                                | 37 |
| <b>Fig. S62.</b> <sup>1</sup> H- <sup>1</sup> H COSY (600 MHz, CDCl <sub>3</sub> ) spectrum of hyperkouytin E (5). | 37 |
| <b>Fig. S63.</b> HMBC (600 MHz, CDCl <sub>3</sub> ) spectrum of hyperkouytin E (5).                                | 38 |
| <b>Fig. S64.</b> HMBC (600 MHz, CDCl <sub>3</sub> ) spectrum of hyperkouytin E (5).                                | 38 |
| <b>Fig. S65.</b> NOESY (600 MHz, CDCl <sub>3</sub> ) spectrum of hyperkouytin E (5).                               | 39 |
| <b>Fig. S66.</b> IR spectrum of hyperkouytin E (5).                                                                | 39 |
| <b>Fig. S67.</b> UV spectrum of hyperkouytin E (5).                                                                | 40 |
| <b>Fig. S68.</b> Positive HR-ESIMS spectrum of hyperkouytin F (6).                                                 | 40 |
| <b>Fig. S69.</b> <sup>1</sup> H NMR (600 MHz, CDCl <sub>3</sub> ) spectrum of hyperkouytin F (6).                  | 41 |
| <b>Fig. S70.</b> <sup>1</sup> H NMR (600 MHz, CDCl <sub>3</sub> ) spectrum of hyperkouytin F (6).                  | 41 |
| <b>Fig. S71.</b> <sup>13</sup> C NMR and DEPT (150 MHz, CDCl <sub>3</sub> ) spectra of hyperkouytin F (6).         | 42 |
| <b>Fig. S72.</b> <sup>13</sup> C NMR and DEPT (150 MHz, CDCl <sub>3</sub> ) spectra of hyperkouytin F (6).         | 42 |
| <b>Fig. S73.</b> HSQC (600 MHz, CDCl <sub>3</sub> ) spectrum of hyperkouytin F (6).                                | 43 |
| <b>Fig. S74.</b> HSQC (600 MHz, CDCl <sub>3</sub> ) spectrum of hyperkouytin F (6).                                | 43 |
| <b>Fig. S75.</b> <sup>1</sup> H- <sup>1</sup> H COSY (600 MHz, CDCl <sub>3</sub> ) spectrum of hyperkouytin F (6). | 44 |
| <b>Fig. S76.</b> HMBC (600 MHz, CDCl <sub>3</sub> ) spectrum of hyperkouytin F (6).                                | 44 |
| <b>Fig. S77.</b> HMBC (600 MHz, CDCl <sub>3</sub> ) spectrum of hyperkouytin F (6).                                | 45 |
| <b>Fig. S78.</b> NOESY (600 MHz, CDCl <sub>3</sub> ) spectrum of hyperkouytin F (6).                               | 45 |
| <b>Fig. S79.</b> IR spectrum of hyperkouytin F (6).                                                                | 46 |
| <b>Fig. S80.</b> UV spectrum of hyperkouytin F (6).                                                                | 46 |

**Table S1.** X-ray crystallographic data for (–)-hyperkouytin A (**1a**)<sup>a</sup>.

|                                   |                                                                                                   |
|-----------------------------------|---------------------------------------------------------------------------------------------------|
| Empirical formula                 | C <sub>48</sub> H <sub>64</sub> O <sub>5</sub>                                                    |
| Formula weight                    | 720.99                                                                                            |
| Temperature                       | 173.01 K                                                                                          |
| Wavelength                        | 1.34139 Å                                                                                         |
| Crystal system                    | Orthorhombic                                                                                      |
| Space group                       | P2 <sub>1</sub> 2 <sub>1</sub> 2 <sub>1</sub>                                                     |
| Unit cell dimensions              | a = 9.7093(5) Å      α = 90 °<br>b = 18.6794(10) Å     β = 90 °<br>c = 23.1009(13) Å     γ = 90 ° |
| Volume                            | 4189.7(4) Å <sup>3</sup>                                                                          |
| Z                                 | 4                                                                                                 |
| Density (calculated)              | 1.143 Mg/m <sup>3</sup>                                                                           |
| Absorption coefficient            | 0.361 mm <sup>-1</sup>                                                                            |
| F(000)                            | 1568                                                                                              |
| Crystal size                      | 0.1 x 0.06 x 0.05 mm <sup>3</sup>                                                                 |
| Theta range for data collection   | 3.915 to 54.872 °                                                                                 |
| Index ranges                      | -8 ≤ h ≤ 11, -22 ≤ k ≤ 22, -28 ≤ l ≤ 28                                                           |
| Reflections collected             | 41441                                                                                             |
| Independent reflections           | 7901 [R(int) = 0.0327]                                                                            |
| Completeness to theta = 53.594 °  | 99.6 %                                                                                            |
| Absorption correction             | Semi-empirical from equivalents                                                                   |
| Max. and min. transmission        | 0.7508 and 0.6456                                                                                 |
| Refinement method                 | Full-matrix least-squares on F <sup>2</sup>                                                       |
| Data / restraints / parameters    | 7901 / 0 / 488                                                                                    |
| Goodness-of-fit on F <sup>2</sup> | 1.067                                                                                             |
| Final R indices [I > 2σ(I)]       | R1 = 0.0342, wR2 = 0.0814                                                                         |
| R indices (all data)              | R1 = 0.0367, wR2 = 0.0837                                                                         |
| Absolute structure parameter      | 0.05(6)                                                                                           |
| Extinction coefficient            | n/a                                                                                               |
| Largest diff. peak and hole       | 0.180 and -0.199 e.Å <sup>-3</sup>                                                                |

<sup>a</sup>Crystals of **1a** were obtained from a mixed solvent (MeOH/H<sub>2</sub>O, 5:1).

**Table S2.** X-ray crystallographic data for (+)-hyperkouytin B (**2b**)<sup>a</sup>.

|                                   |                                                                                                 |
|-----------------------------------|-------------------------------------------------------------------------------------------------|
| Empirical formula                 | C <sub>43</sub> H <sub>56</sub> O <sub>5</sub>                                                  |
| Formula weight                    | 652.87                                                                                          |
| Temperature                       | 173.0 K                                                                                         |
| Wavelength                        | 1.34139 Å                                                                                       |
| Crystal system                    | Orthorhombic                                                                                    |
| Space group                       | P2 <sub>1</sub> 2 <sub>1</sub> 2 <sub>1</sub>                                                   |
| Unit cell dimensions              | a = 9.2293(5) Å      α = 90 °<br>b = 23.5572(14) Å    β = 90 °<br>c = 34.549(2) Å      γ = 90 ° |
| Volume                            | 7511.5(8) Å <sup>3</sup>                                                                        |
| Z                                 | 8                                                                                               |
| Density (calculated)              | 1.155 Mg/m <sup>3</sup>                                                                         |
| Absorption coefficient            | 0.372 mm <sup>-1</sup>                                                                          |
| F(000)                            | 2832                                                                                            |
| Crystal size                      | 0.1 x 0.06 x 0.05 mm <sup>3</sup>                                                               |
| Theta range for data collection   | 3.449 to 54.974 °                                                                               |
| Index ranges                      | -11 ≤ h ≤ 5, -28 ≤ k ≤ 23, -41 ≤ l ≤ 42                                                         |
| Reflections collected             | 47528                                                                                           |
| Independent reflections           | 14111 [R(int) = 0.0514]                                                                         |
| Completeness to theta = 53.594 °  | 99.6 %                                                                                          |
| Absorption correction             | Semi-empirical from equivalents                                                                 |
| Max. and min. transmission        | 0.7508 and 0.5413                                                                               |
| Refinement method                 | Full-matrix least-squares on F <sup>2</sup>                                                     |
| Data / restraints / parameters    | 14111 / 0 / 884                                                                                 |
| Goodness-of-fit on F <sup>2</sup> | 1.070                                                                                           |
| Final R indices [I > 2σ(I)]       | R1 = 0.0526, wR2 = 0.1128                                                                       |
| R indices (all data)              | R1 = 0.0740, wR2 = 0.1309                                                                       |
| Absolute structure parameter      | 0.06(11)                                                                                        |
| Extinction coefficient            | 0.00150(12)                                                                                     |
| Largest diff. peak and hole       | 0.234 and -0.200 e.Å <sup>-3</sup>                                                              |

<sup>a</sup>Crystals of **2b** were obtained from a mixed solvent (MeOH/H<sub>2</sub>O, 5:1).

**Table S3.** X-ray crystallographic data for (+)-hyperkouytin D (**4b**)<sup>a</sup>.

|                                   |                                                |          |
|-----------------------------------|------------------------------------------------|----------|
| Empirical formula                 | C <sub>48</sub> H <sub>64</sub> O <sub>5</sub> |          |
| Formula weight                    | 720.99                                         |          |
| Temperature                       | 173.0 K                                        |          |
| Wavelength                        | 1.34139 Å                                      |          |
| Crystal system                    | Orthorhombic                                   |          |
| Space group                       | P2 <sub>1</sub> 2 <sub>1</sub> 2 <sub>1</sub>  |          |
| Unit cell dimensions              | a = 9.4449(13) Å                               | α = 90 ° |
|                                   | b = 18.494(3) Å                                | β = 90 ° |
|                                   | c = 24.612(4) Å                                | γ = 90 ° |
| Volume                            | 4299.0(10) Å <sup>3</sup>                      |          |
| Z                                 | 4                                              |          |
| Density (calculated)              | 1.114 Mg/m <sup>3</sup>                        |          |
| Absorption coefficient            | 0.352 mm <sup>-1</sup>                         |          |
| F(000)                            | 1568                                           |          |
| Crystal size                      | 0.1 x 0.05 x 0.05 mm <sup>3</sup>              |          |
| Theta range for data collection   | 4.362 to 54.950 °                              |          |
| Index ranges                      | -9 ≤ h ≤ 11, -22 ≤ k ≤ 22, -30 ≤ l ≤ 30        |          |
| Reflections collected             | 46312                                          |          |
| Independent reflections           | 8130 [R(int) = 0.0462]                         |          |
| Completeness to theta = 53.594 °  | 99.7 %                                         |          |
| Absorption correction             | Semi-empirical from equivalents                |          |
| Max. and min. transmission        | 0.7508 and 0.6274                              |          |
| Refinement method                 | Full-matrix least-squares on F <sup>2</sup>    |          |
| Data / restraints / parameters    | 8130 / 24 / 488                                |          |
| Goodness-of-fit on F <sup>2</sup> | 1.063                                          |          |
| Final R indices [I > 2σ(I)]       | R1 = 0.0664, wR2 = 0.1927                      |          |
| R indices (all data)              | R1 = 0.0721, wR2 = 0.2024                      |          |
| Absolute structure parameter      | 0.08(8)                                        |          |
| Extinction coefficient            | n/a                                            |          |
| Largest diff. peak and hole       | 1.172 and -0.454 e.Å <sup>-3</sup>             |          |

<sup>a</sup>Crystals of **4b** were obtained from a mixed solvent (MeOH/H<sub>2</sub>O, 5:1).

**Table S4.** X-ray crystallographic data for (+)-hyperkouytin E (**5b**)<sup>a</sup>.

|                                   |                                                                                                         |
|-----------------------------------|---------------------------------------------------------------------------------------------------------|
| Empirical formula                 | C <sub>48</sub> H <sub>64</sub> O <sub>5</sub>                                                          |
| Formula weight                    | 720.99                                                                                                  |
| Temperature                       | 296 K                                                                                                   |
| Wavelength                        | 1.34139 Å                                                                                               |
| Crystal system                    | Monoclinic                                                                                              |
| Space group                       | C 1 2 1                                                                                                 |
| Unit cell dimensions              | a = 46.394(4) Å      α = 90 °<br>b = 9.7640(8) Å      β = 105.973(5) °<br>c = 19.7131(15) Å    γ = 90 ° |
| Volume                            | 8585.0(12) Å <sup>3</sup>                                                                               |
| Z                                 | 8                                                                                                       |
| Density (calculated)              | 1.116 Mg/m <sup>3</sup>                                                                                 |
| Absorption coefficient            | 0.353 mm <sup>-1</sup>                                                                                  |
| F(000)                            | 3136                                                                                                    |
| Crystal size                      | 0.1 x 0.02 x 0.01 mm <sup>3</sup>                                                                       |
| Theta range for data collection   | 3.487 to 55.200 °                                                                                       |
| Index ranges                      | -56 ≤ h ≤ 55, -11 ≤ k ≤ 11, -24 ≤ l ≤ 24                                                                |
| Reflections collected             | 54815                                                                                                   |
| Independent reflections           | 16239 [R(int) = 0.0685]                                                                                 |
| Completeness to theta = 53.594 °  | 99.9 %                                                                                                  |
| Absorption correction             | Semi-empirical from equivalents                                                                         |
| Max. and min. transmission        | 0.7508 and 0.4572                                                                                       |
| Refinement method                 | Full-matrix least-squares on F <sup>2</sup>                                                             |
| Data / restraints / parameters    | 16239 / 1 / 975                                                                                         |
| Goodness-of-fit on F <sup>2</sup> | 1.004                                                                                                   |
| Final R indices [I > 2σ(I)]       | R1 = 0.0661, wR2 = 0.1679                                                                               |
| R indices (all data)              | R1 = 0.1007, wR2 = 0.1958                                                                               |
| Absolute structure parameter      | 0.06(13)                                                                                                |
| Extinction coefficient            | n/a                                                                                                     |
| Largest diff. peak and hole       | 0.506 and -0.319 e.Å <sup>-3</sup>                                                                      |

<sup>a</sup>Crystals of **5b** were obtained from a mixed solvent (MeOH/H<sub>2</sub>O, 5:1).



**Table S5.** X-ray crystallographic data for (–)-hyperkouytin F (**6a**)<sup>a</sup>.

|                                   |                                                                                                          |
|-----------------------------------|----------------------------------------------------------------------------------------------------------|
| Empirical formula                 | C <sub>43</sub> H <sub>56</sub> O <sub>5</sub>                                                           |
| Formula weight                    | 652.87                                                                                                   |
| Temperature                       | 296 K                                                                                                    |
| Wavelength                        | 1.34139 Å                                                                                                |
| Crystal system                    | Monoclinic                                                                                               |
| Space group                       | P 1 21 1                                                                                                 |
| Unit cell dimensions              | a = 13.7143(6) Å      α = 90 °<br>b = 9.7311(4) Å      β = 96.506(3) °<br>c = 14.4170(6) Å      γ = 90 ° |
| Volume                            | 1911.63(14) Å <sup>3</sup>                                                                               |
| Z                                 | 2                                                                                                        |
| Density (calculated)              | 1.134 Mg/m <sup>3</sup>                                                                                  |
| Absorption coefficient            | 0.362 mm <sup>-1</sup>                                                                                   |
| F(000)                            | 708                                                                                                      |
| Crystal size                      | 0.07 x 0.07 x 0.05 mm <sup>3</sup>                                                                       |
| Theta range for data collection   | 2.684 to 55.162 °                                                                                        |
| Index ranges                      | -15 ≤ h ≤ 16, -11 ≤ k ≤ 11, -17 ≤ l ≤ 17                                                                 |
| Reflections collected             | 28908                                                                                                    |
| Independent reflections           | 7217 [R(int) = 0.0556]                                                                                   |
| Completeness to theta = 53.594 °  | 99.9 %                                                                                                   |
| Absorption correction             | Semi-empirical from equivalents                                                                          |
| Max. and min. transmission        | 0.7508 and 0.5931                                                                                        |
| Refinement method                 | Full-matrix least-squares on F <sup>2</sup>                                                              |
| Data / restraints / parameters    | 7217 / 1 / 442                                                                                           |
| Goodness-of-fit on F <sup>2</sup> | 1.177                                                                                                    |
| Final R indices [I > 2σ(I)]       | R1 = 0.0742, wR2 = 0.1706                                                                                |
| R indices (all data)              | R1 = 0.1331, wR2 = 0.2020                                                                                |
| Absolute structure parameter      | 0.03(16)                                                                                                 |
| Extinction coefficient            | n/a                                                                                                      |
| Largest diff. peak and hole       | 0.228 and -0.232 e.Å <sup>-3</sup>                                                                       |

<sup>a</sup>Crystals of **6a** were obtained from a mixed solvent (MeOH/H<sub>2</sub>O, 5:1).

**Scheme S1.** Hypothetical biosynthetic pathways for **1a/1b–6a/6b**.

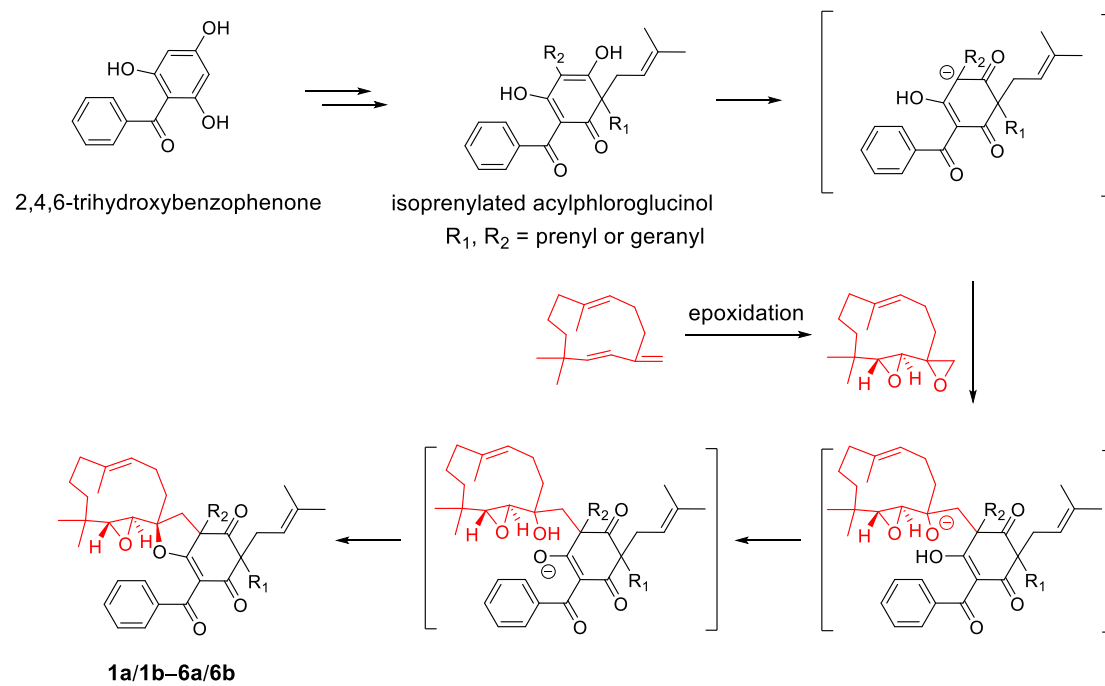

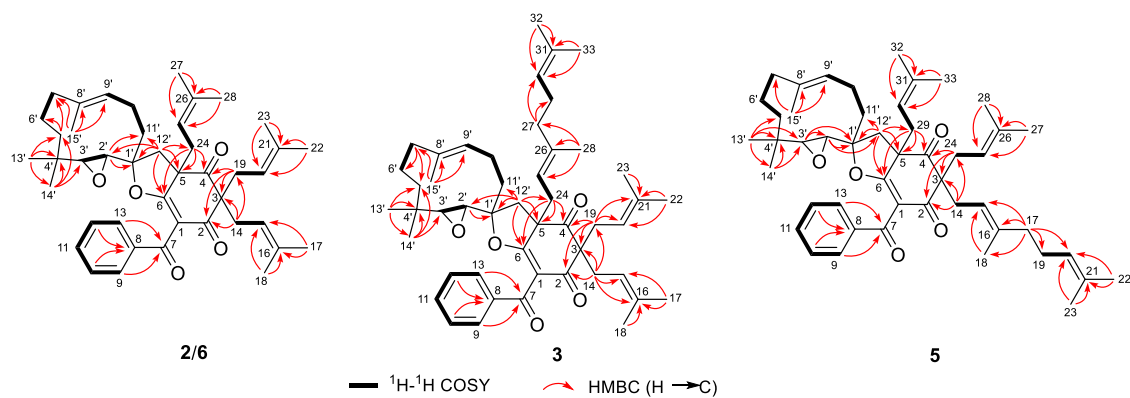

**Fig. S1.** Key  $^1\text{H}$ - $^1\text{H}$  COSY and HMBC correlations of **2**, **3**, **5**, and **6**.

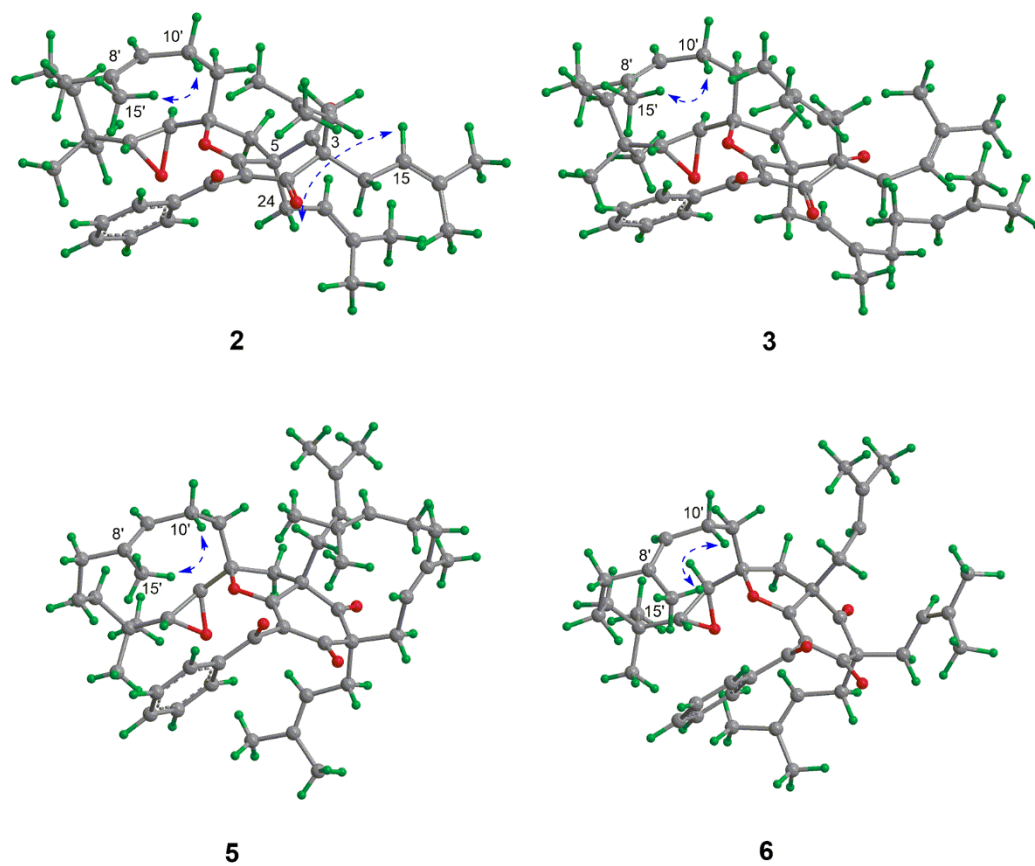

**Fig. S2.** Key NOESY correlations of **2**, **3**, **5**, and **6**.

## Original Spectroscopic Data

**Fig. S3.** Positive HR-ESIMS spectrum of hyperkouytin A (**1**).

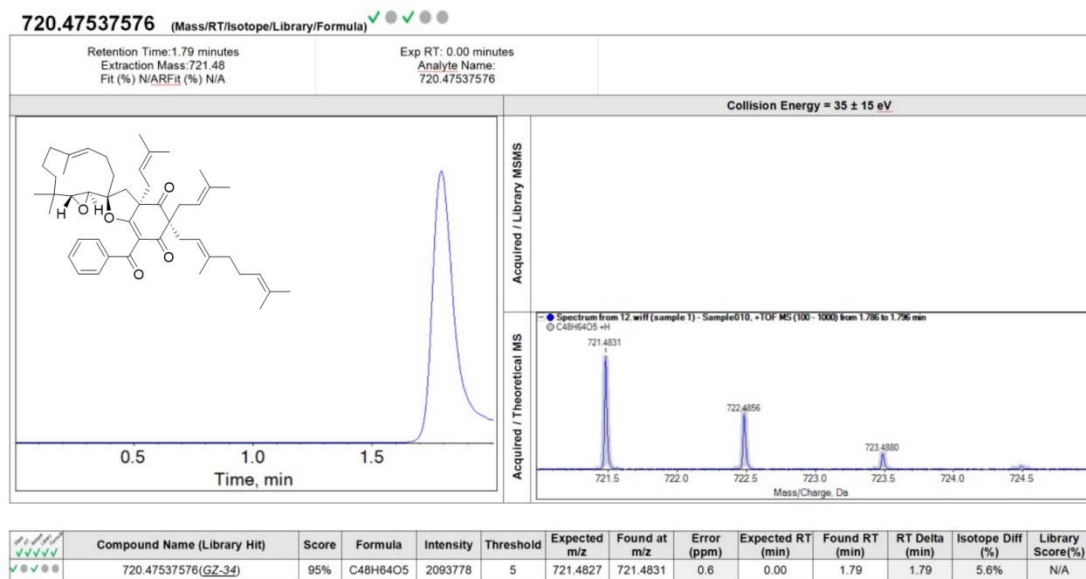

**Fig. S4.**  $^1\text{H}$  NMR (600 MHz,  $\text{CDCl}_3$ ) spectrum of hyperkouytin A (**1**).

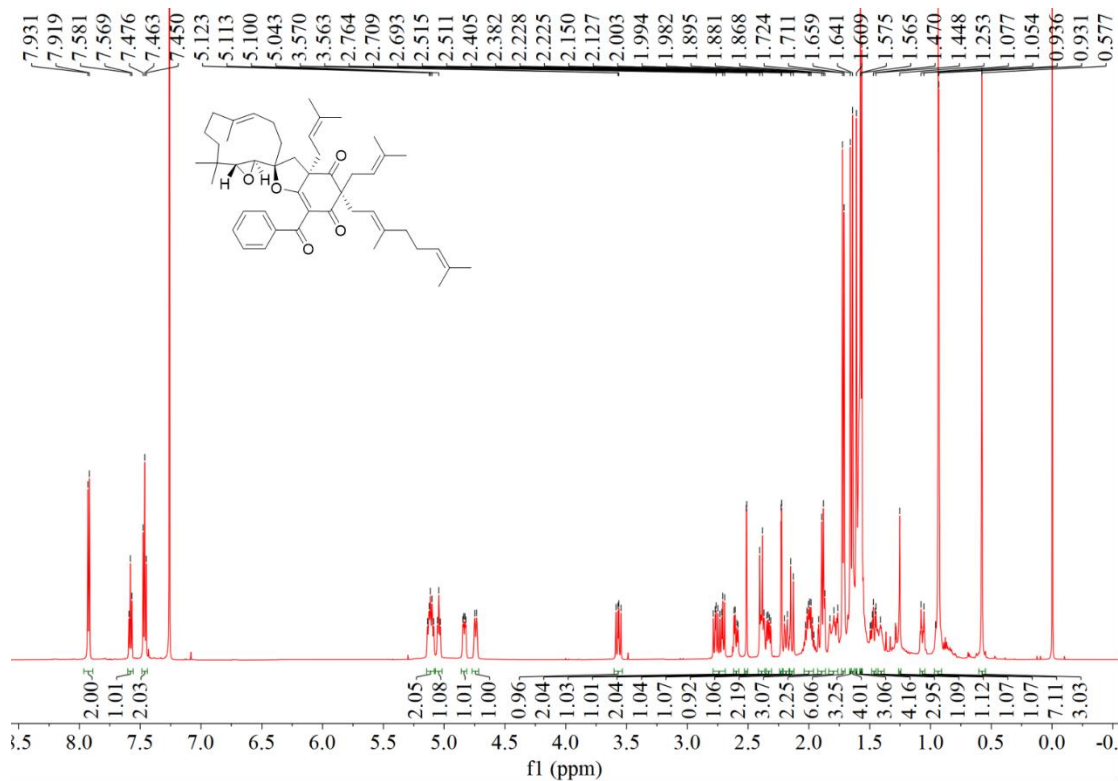

**Fig. S5.**  $^1\text{H}$  NMR (600 MHz,  $\text{CDCl}_3$ ) spectrum of hyperkouytin A (**1**).

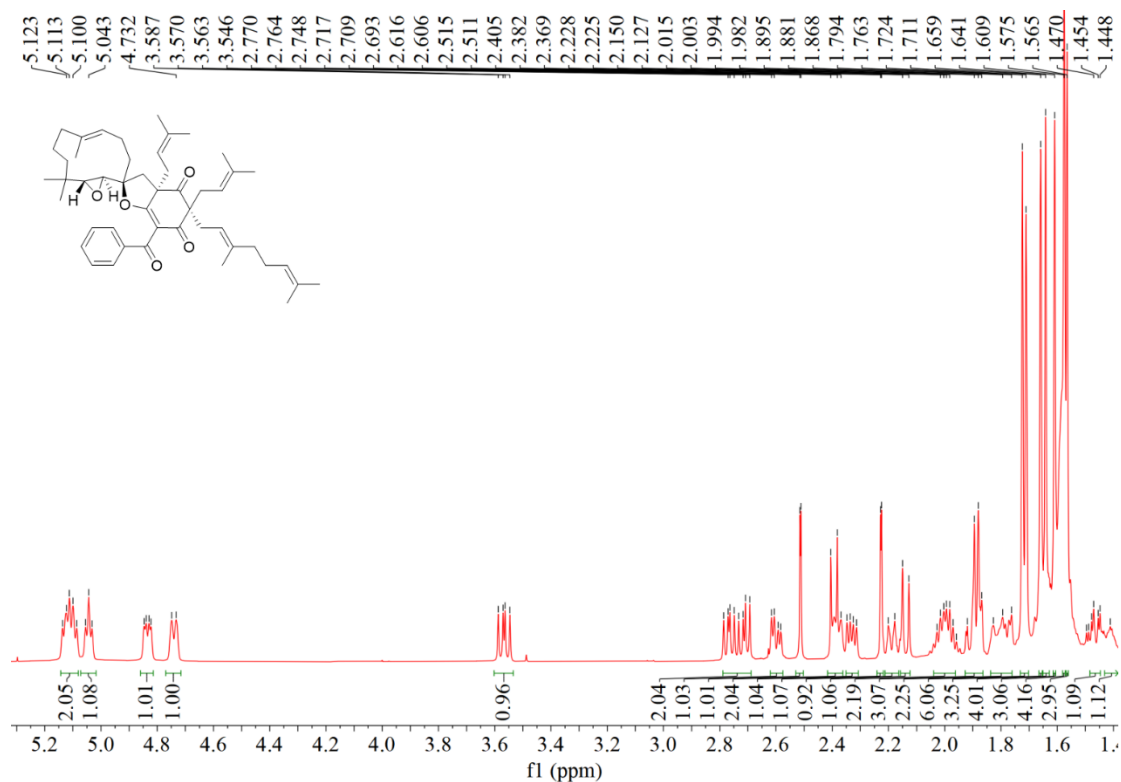

**Fig. S6.**  $^{13}\text{C}$  NMR and DEPT (150 MHz,  $\text{CDCl}_3$ ) spectra of hyperkouytin A (**1**).

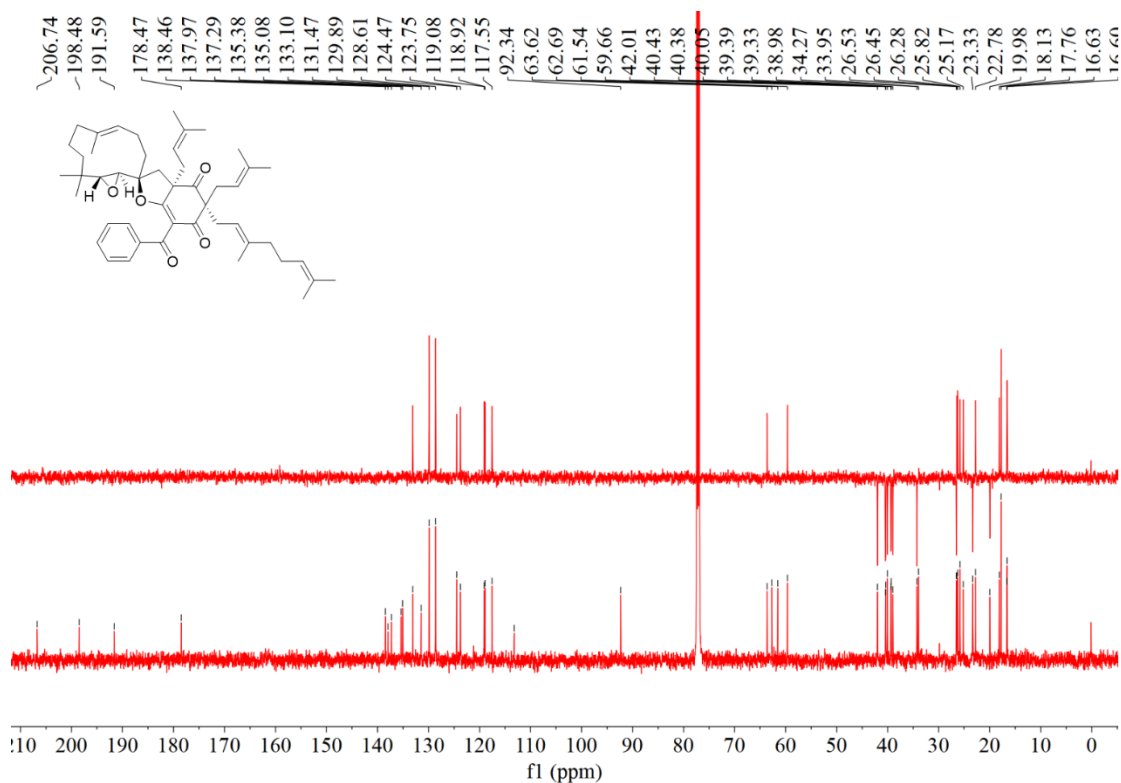

**Fig. S7.**  $^{13}\text{C}$  NMR and DEPT (150 MHz,  $\text{CDCl}_3$ ) spectra of hyperkouytin A (**1**).

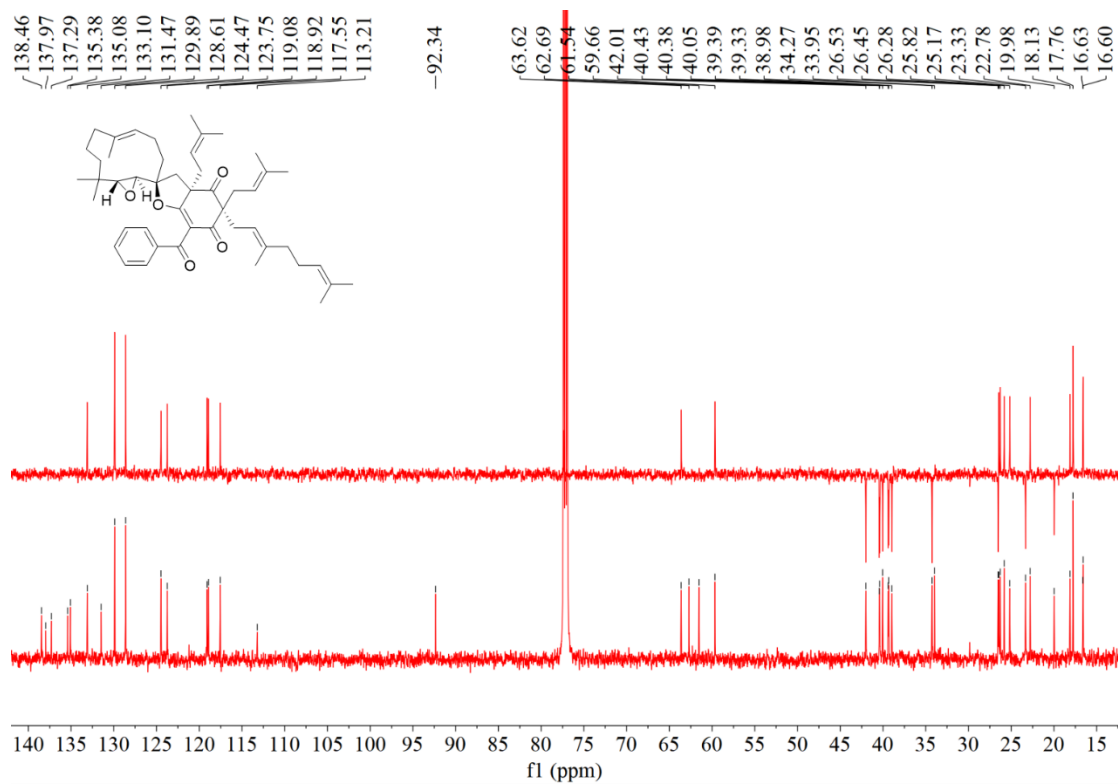

**Fig. S8.** HSQC (600 MHz,  $\text{CDCl}_3$ ) spectrum of hyperkouytin A (**1**).

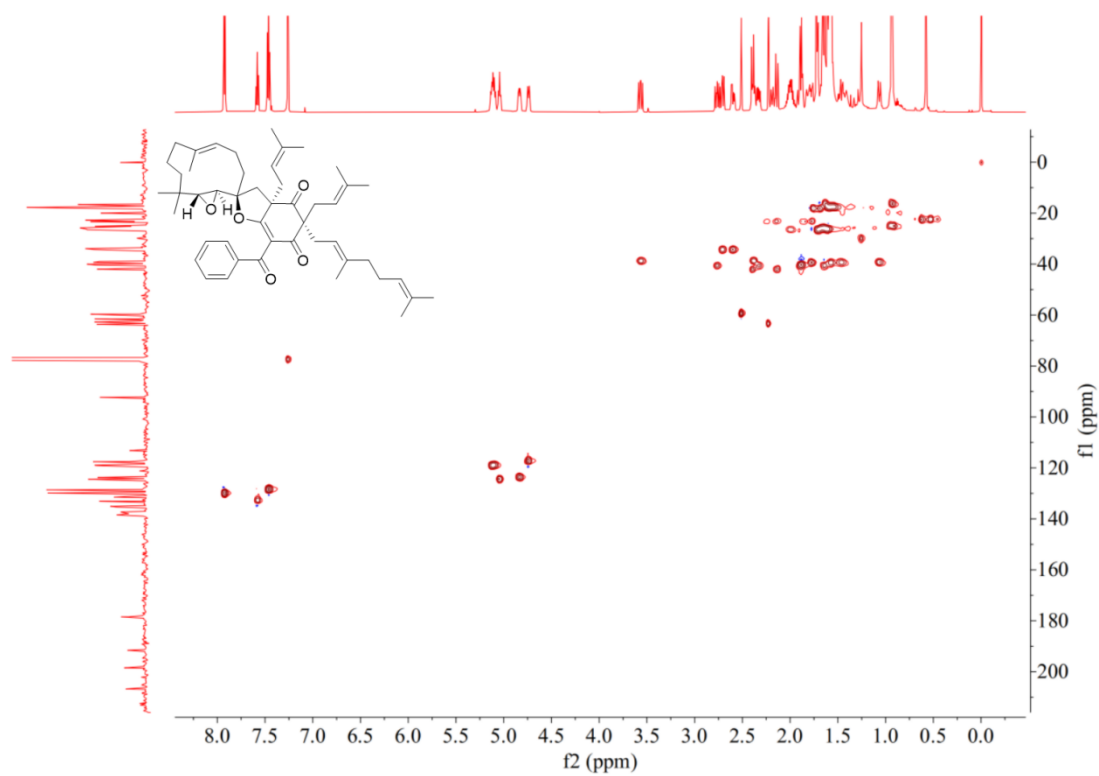

**Fig. S9.** HSQC (600 MHz, CDCl<sub>3</sub>) spectrum of hyperkouytin A (**1**).

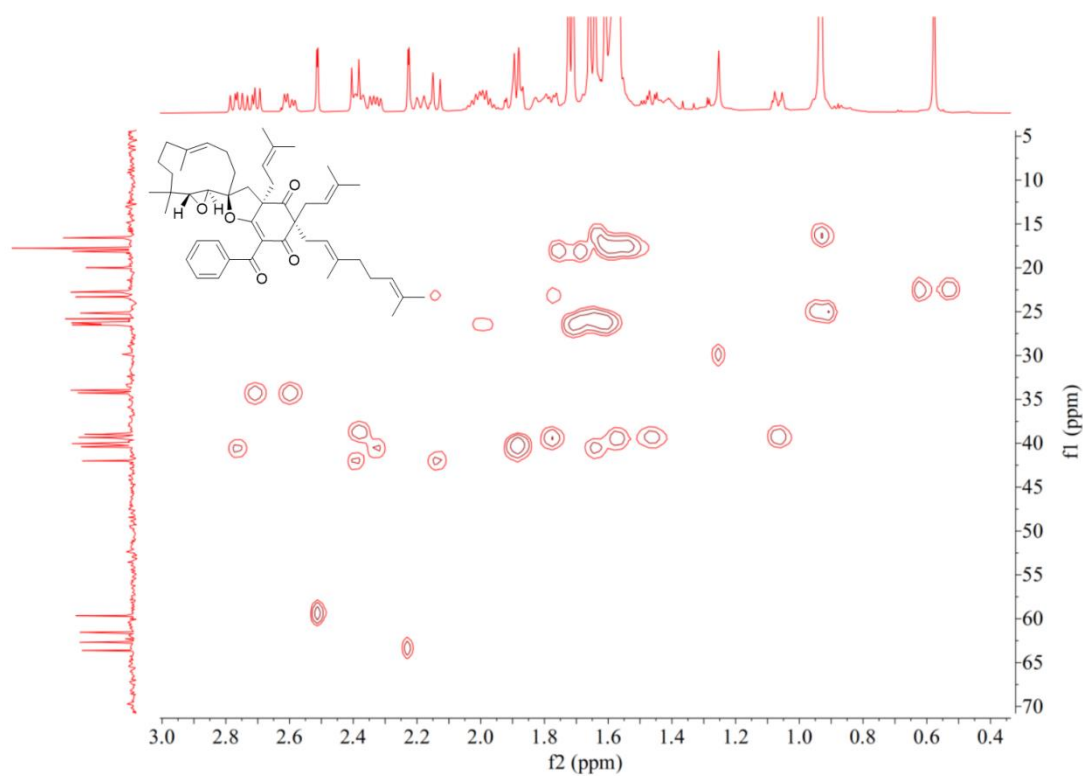

**Fig. S10.** <sup>1</sup>H-<sup>1</sup>H COSY (600 MHz, CDCl<sub>3</sub>) spectrum of hyperkouytin A (**1**).

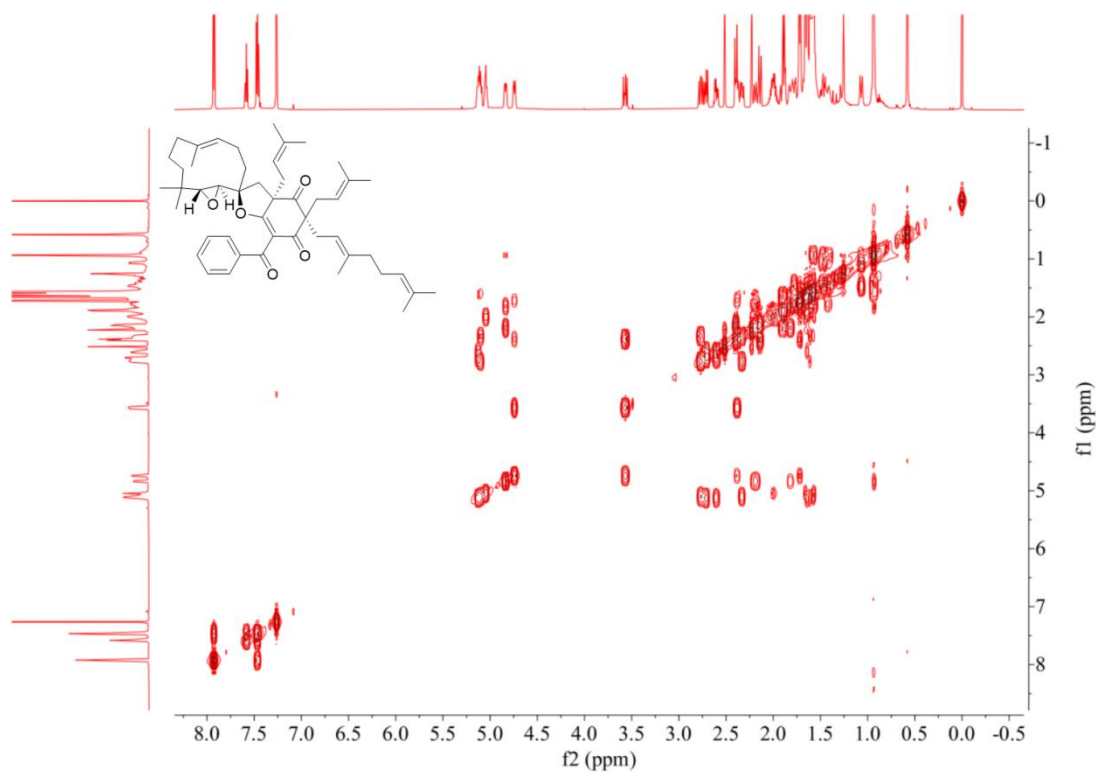

**Fig. S11.** HMBC (600 MHz, CDCl<sub>3</sub>) spectrum of hyperkouytin A (**1**).

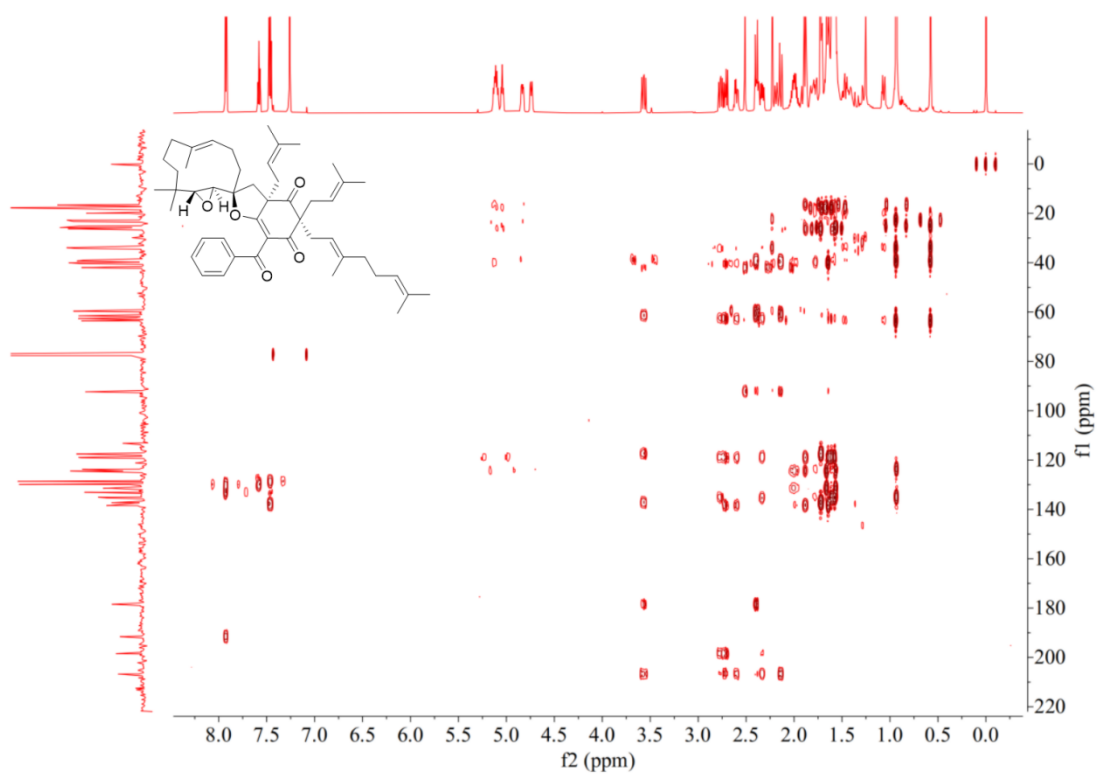

**Fig. S12.** HMBC (600 MHz, CDCl<sub>3</sub>) spectrum of hyperkouytin A (**1**).

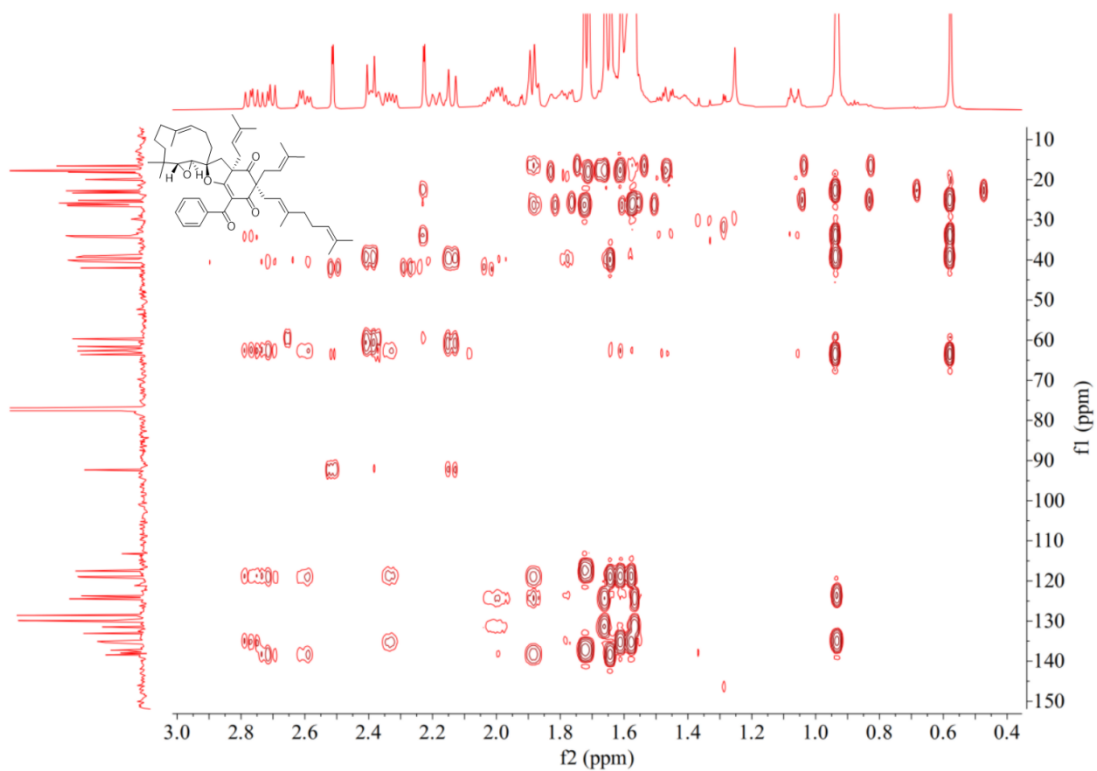



**Fig. S13.** NOESY (600 MHz, CDCl<sub>3</sub>) spectrum of hyperkouytin A (**1**).

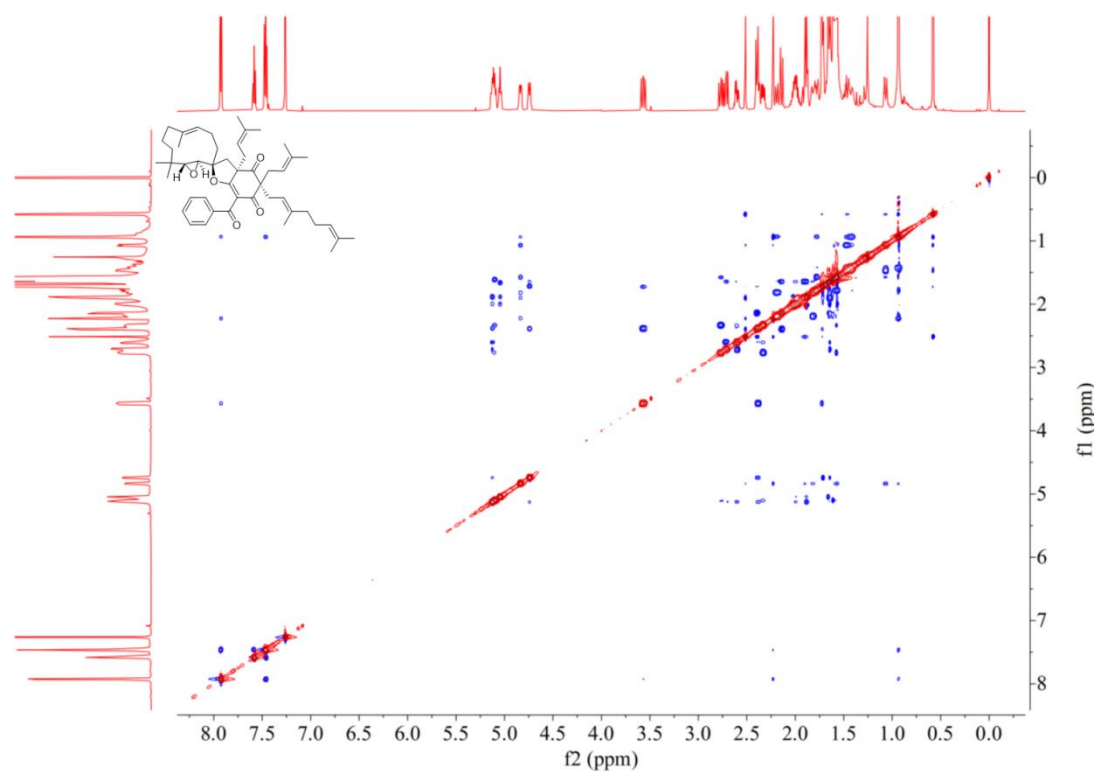

**Fig. S14.** IR spectrum of hyperkouytin A (**1**).

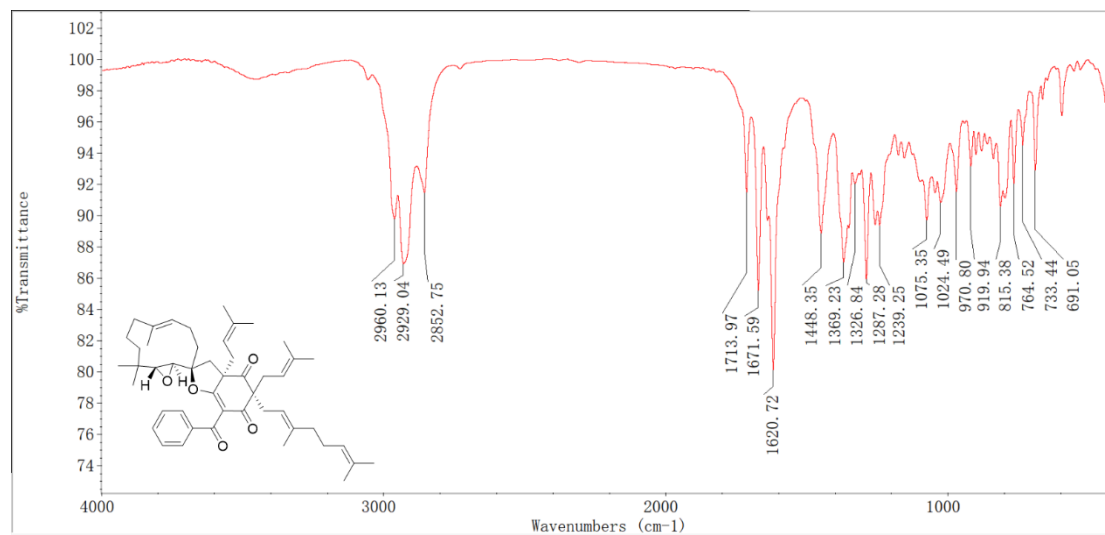

**Fig. S15.** UV spectrum of hyperkouytin A (**1**).

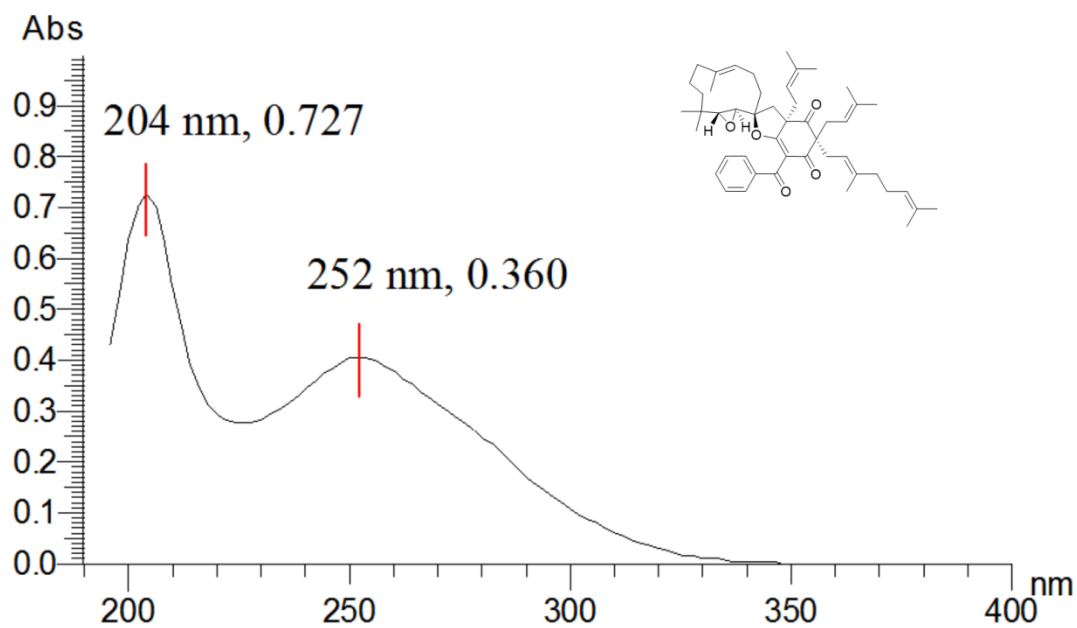

**Fig. S16.** Positive HR-ESIMS spectrum of hyperkouytin B (**2**).

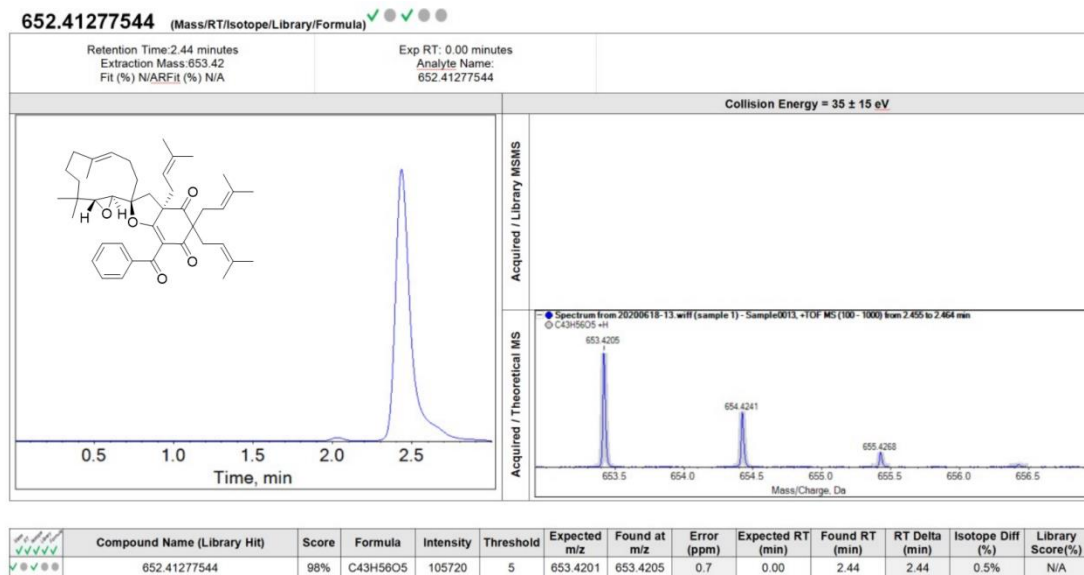

**Fig. S17.**  $^1\text{H}$  NMR (600 MHz,  $\text{CDCl}_3$ ) spectrum of hyperkouytin B (**2**).

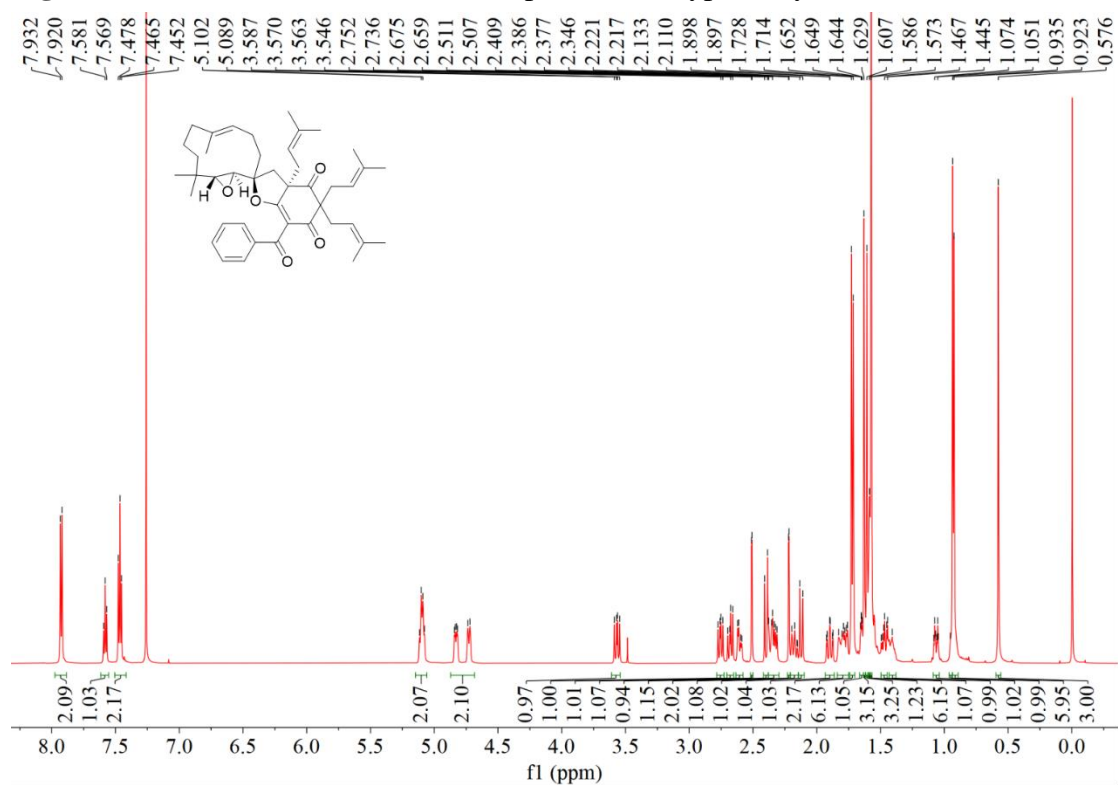

**Fig. S18.**  $^1\text{H}$  NMR (600 MHz,  $\text{CDCl}_3$ ) spectrum of hyperkouytin B (**2**).

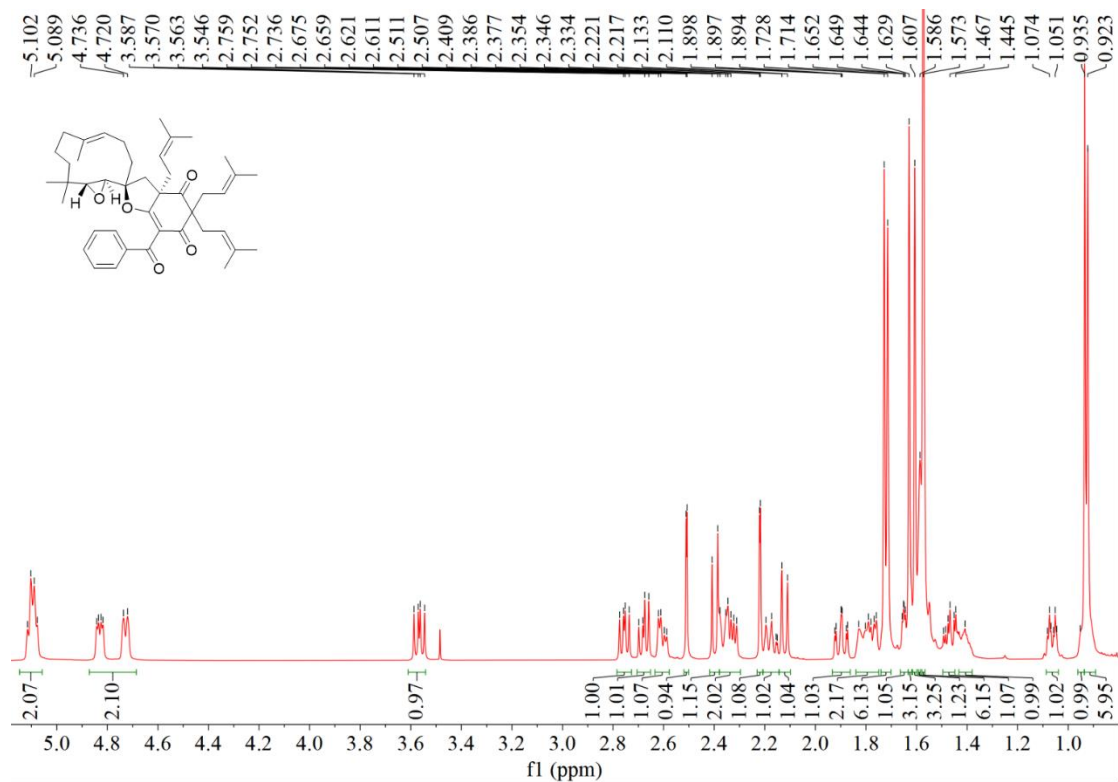

**Fig. S19.**  $^{13}\text{C}$  NMR and DEPT (150 MHz,  $\text{CDCl}_3$ ) spectra of hyperkouytin B (**2**).

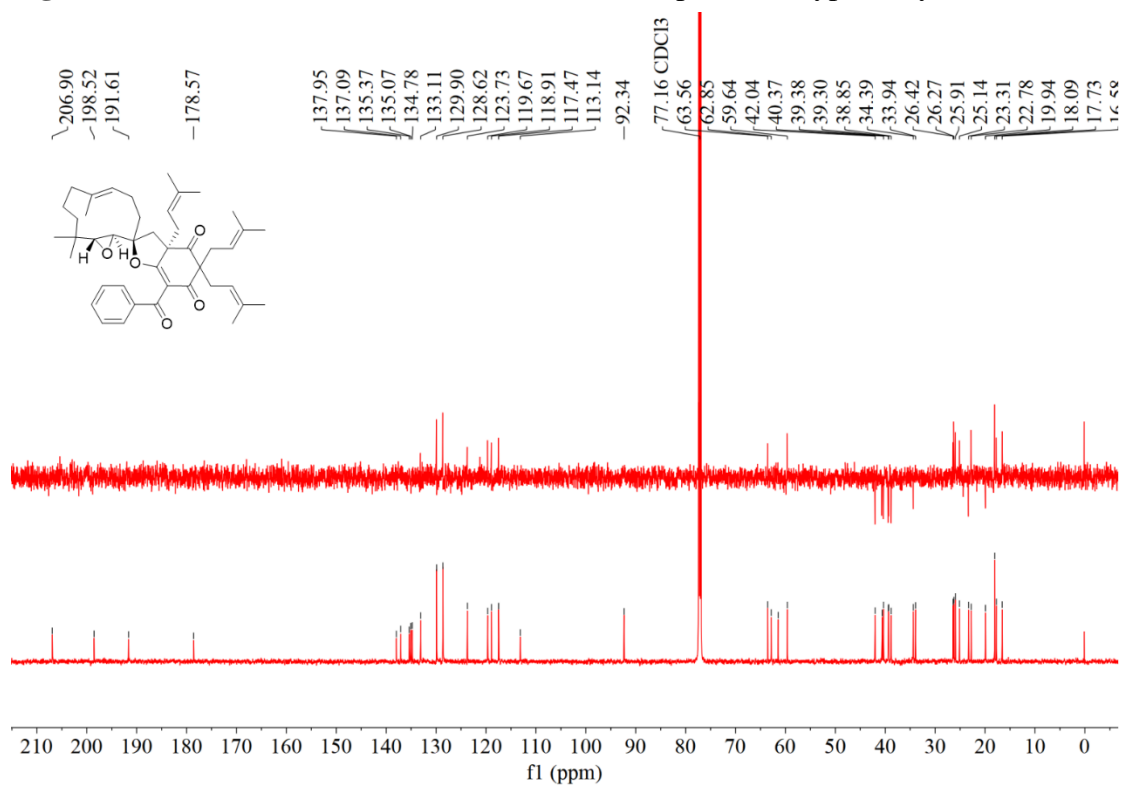

**Fig. S20.**  $^{13}\text{C}$  NMR and DEPT (150 MHz,  $\text{CDCl}_3$ ) spectra of hyperkouytin B (**2**).

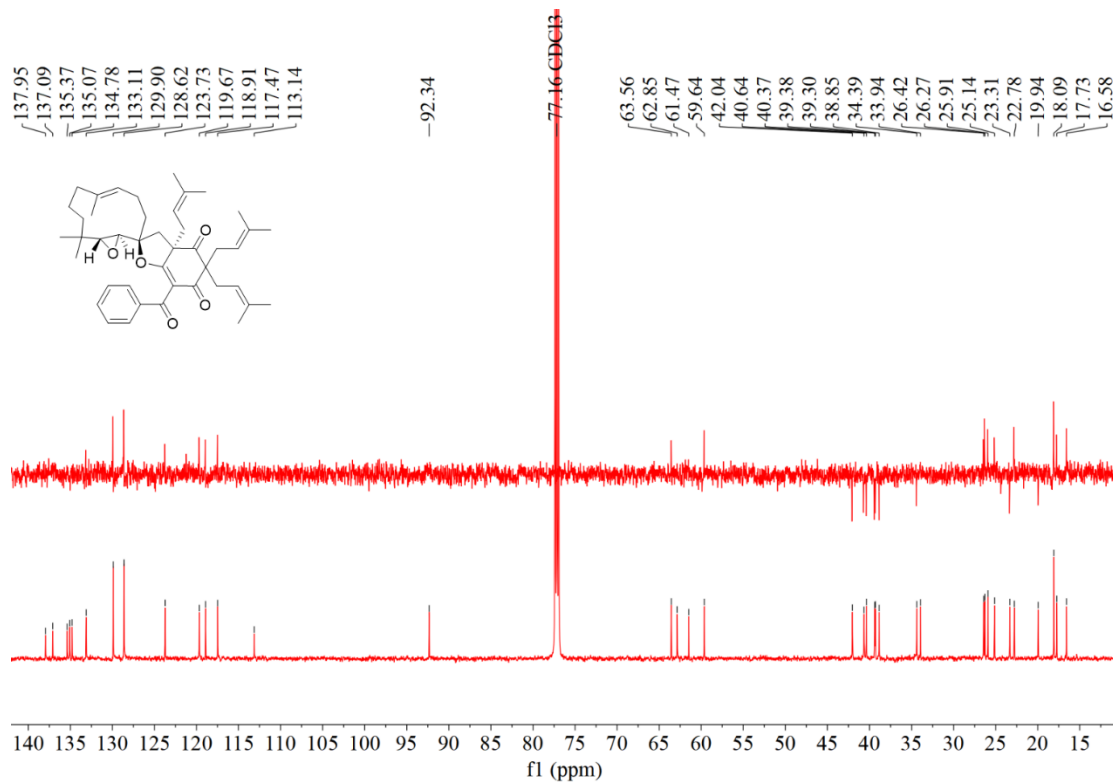

**Fig. S21.** HSQC (600 MHz, CDCl<sub>3</sub>) spectrum of hyperkouytin B (**2**).

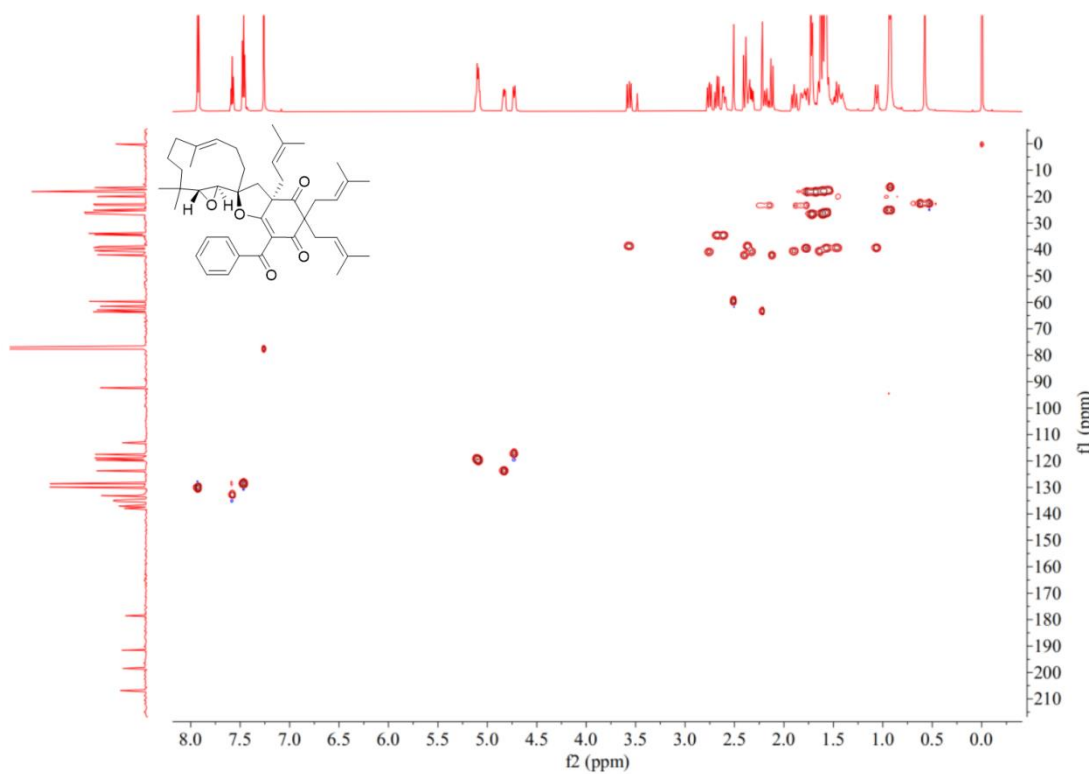

**Fig. S22.** HSQC (600 MHz, CDCl<sub>3</sub>) spectrum of hyperkouytin B (**2**).

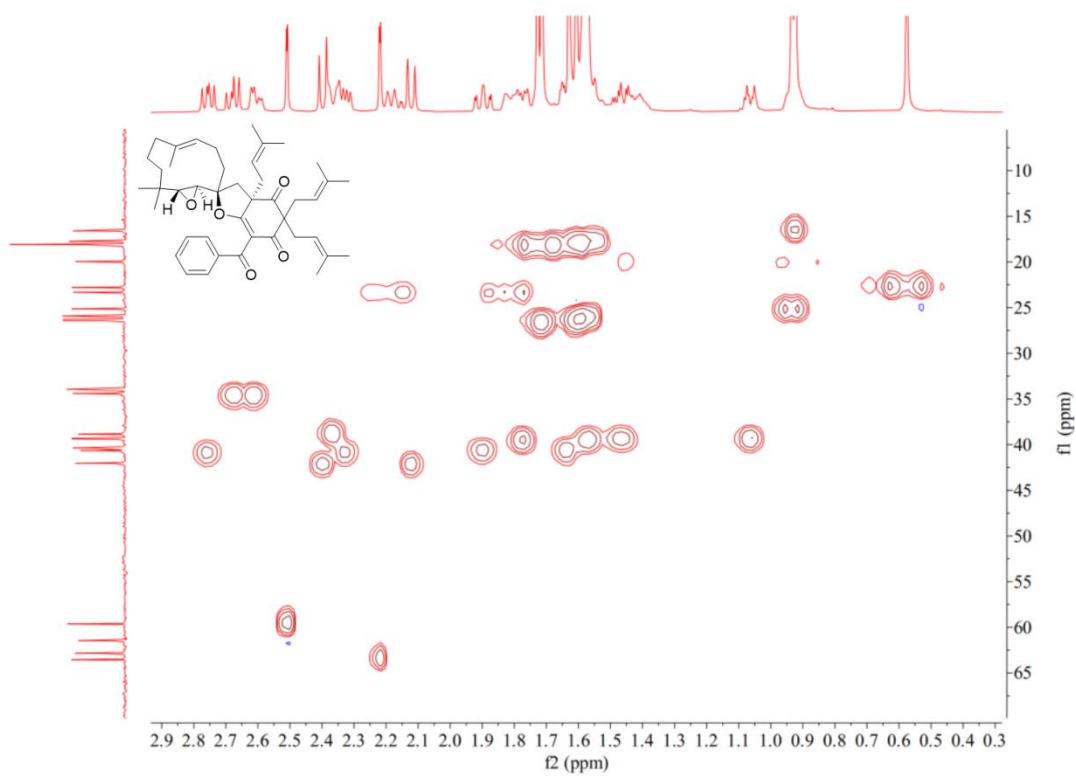

**Fig. S23.**  $^1\text{H}$ - $^1\text{H}$  COSY (600 MHz,  $\text{CDCl}_3$ ) spectrum of hyperkouytin B (**2**).

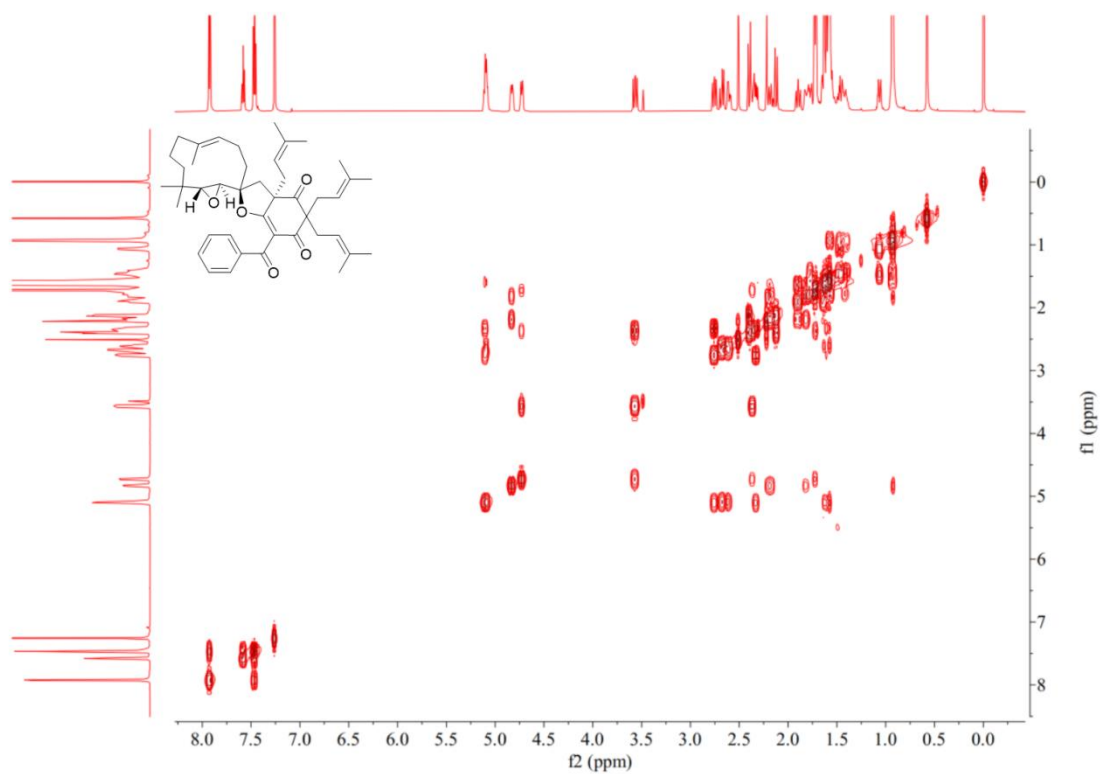

**Fig. S24.** HMBC (600 MHz,  $\text{CDCl}_3$ ) spectrum of hyperkouytin B (**2**).

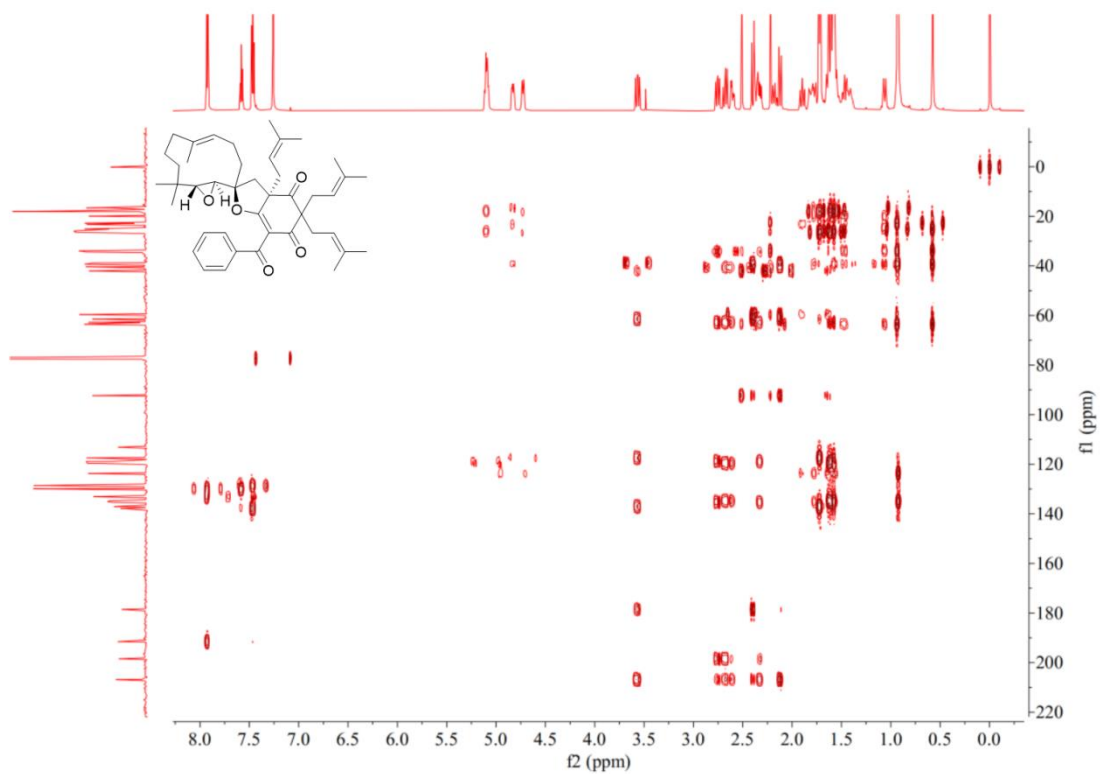

**Fig. S25.** HMBC (600 MHz, CDCl<sub>3</sub>) spectrum of hyperkouytin B (**2**).

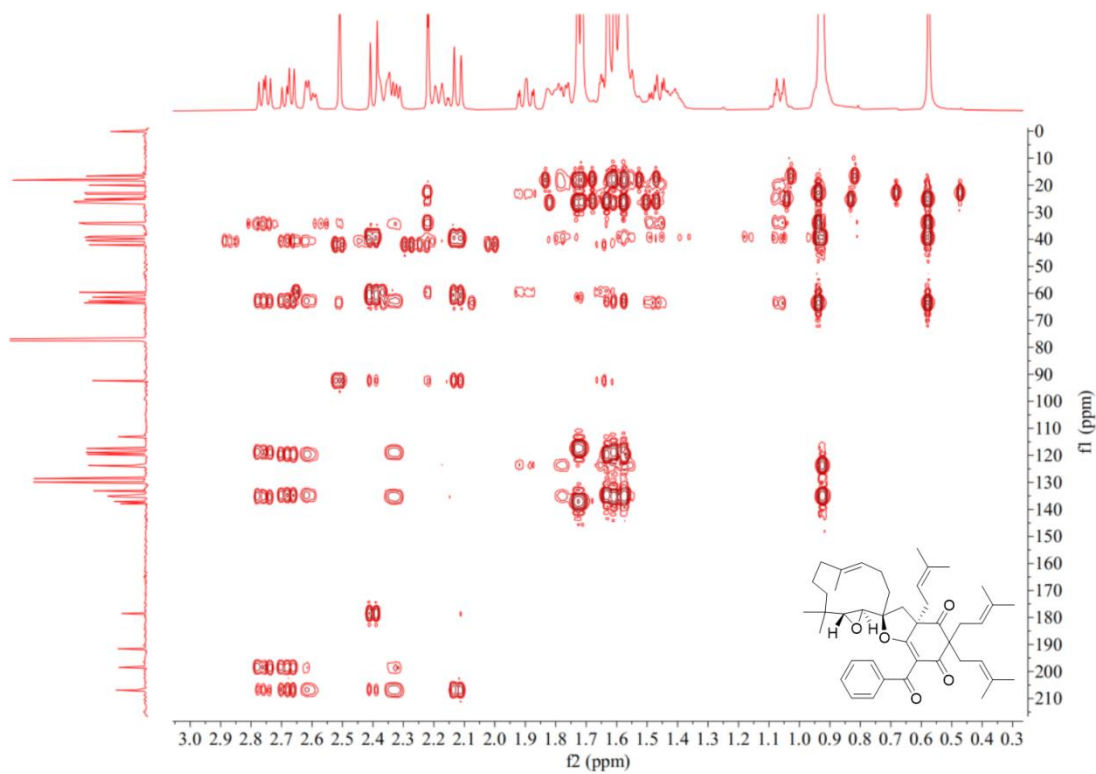

**Fig. S26.** NOESY (600 MHz, CDCl<sub>3</sub>) spectrum of hyperkouytin B (**2**).

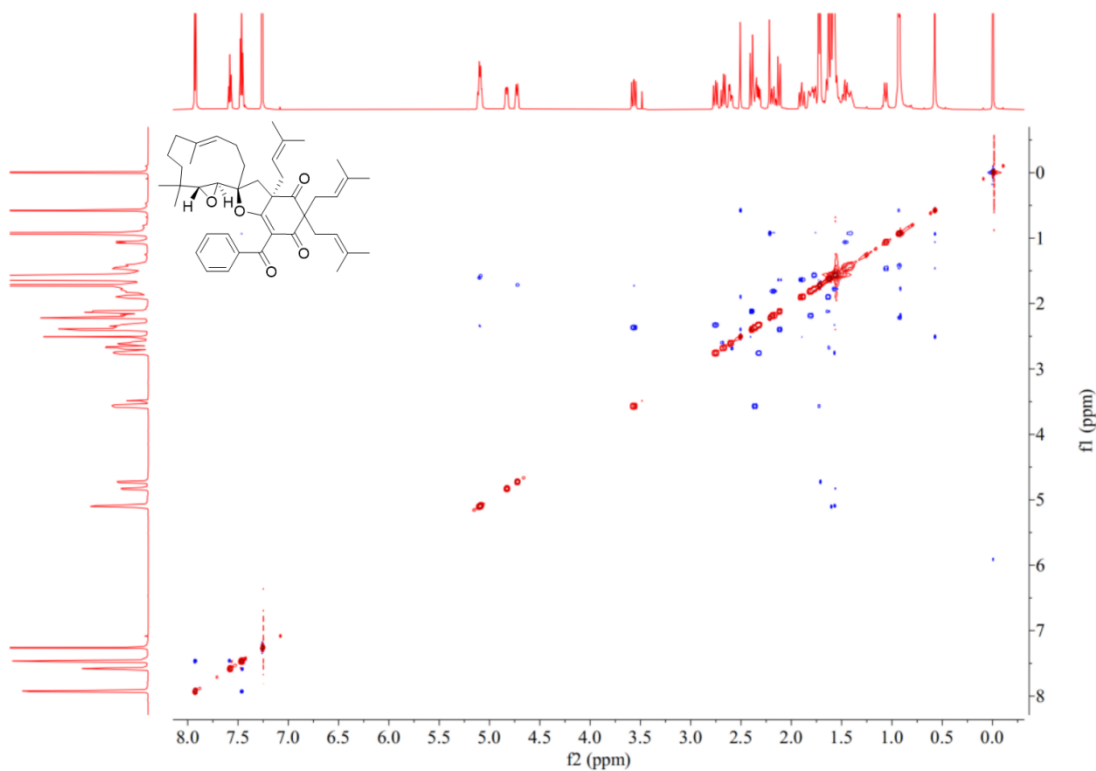

**Fig. S27.** IR spectrum of hyperkouytin B (2).

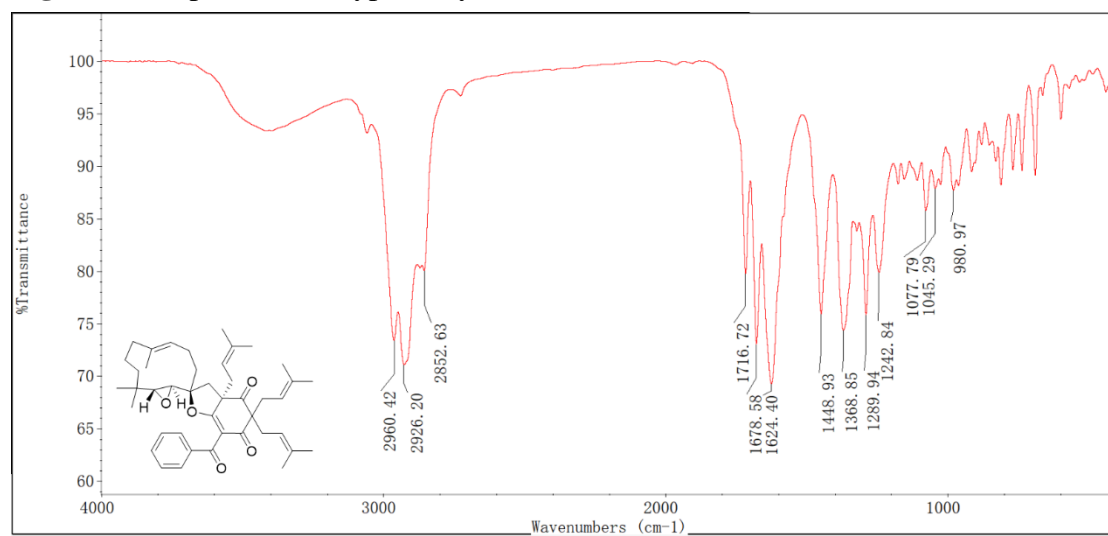

**Fig. S28.** UV spectrum of hyperkouytin B (2).

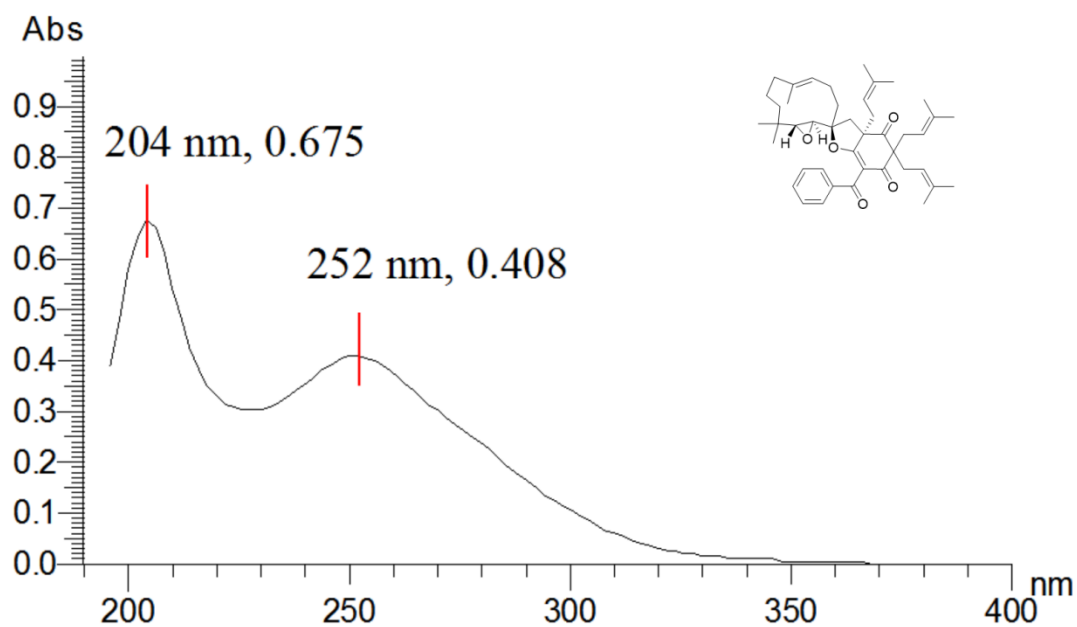



**Fig. S29.** Positive HR-ESIMS spectrum of hyperkoytin C (**3**).

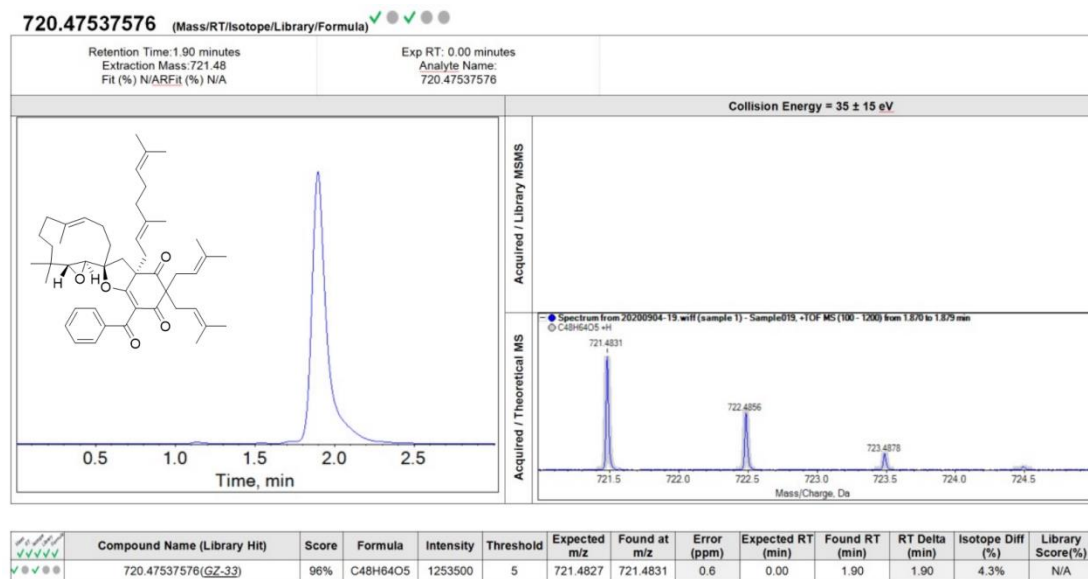

**Fig. S30.** <sup>1</sup>H NMR (600 MHz, CDCl<sub>3</sub>) spectrum of hyperkoytin C (**3**).

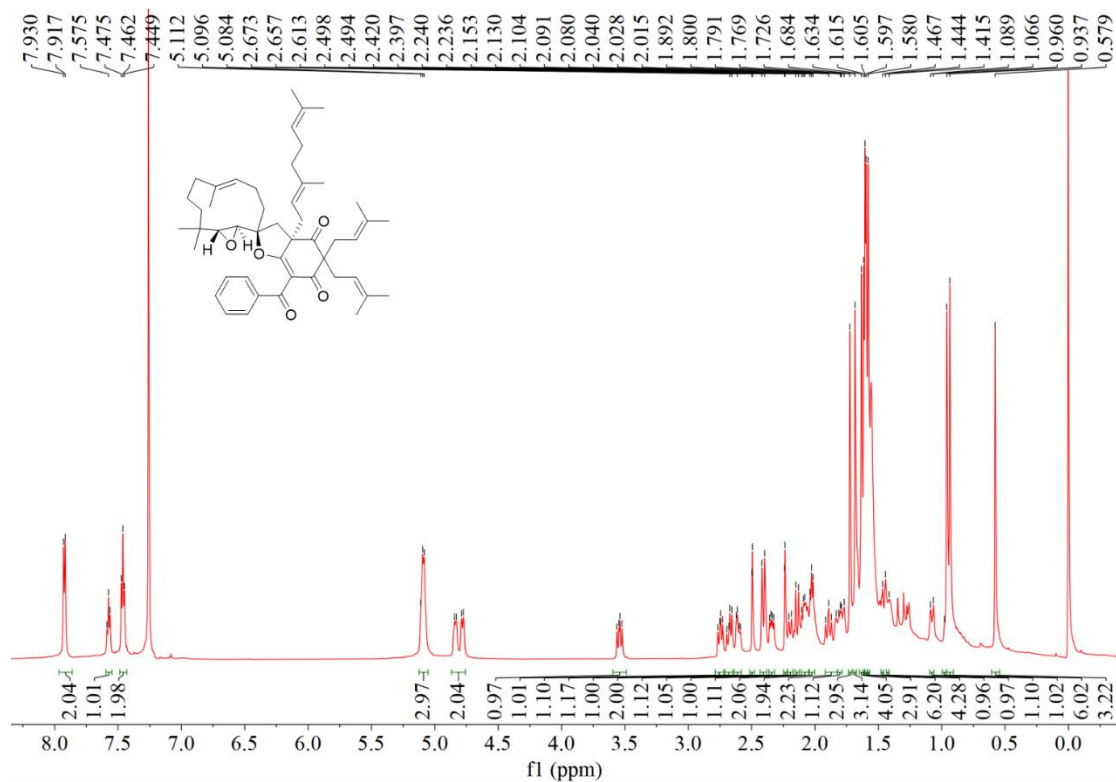

**Fig. S31.**  $^1\text{H}$  NMR (600 MHz,  $\text{CDCl}_3$ ) spectrum of hyperkouytin C (**3**).

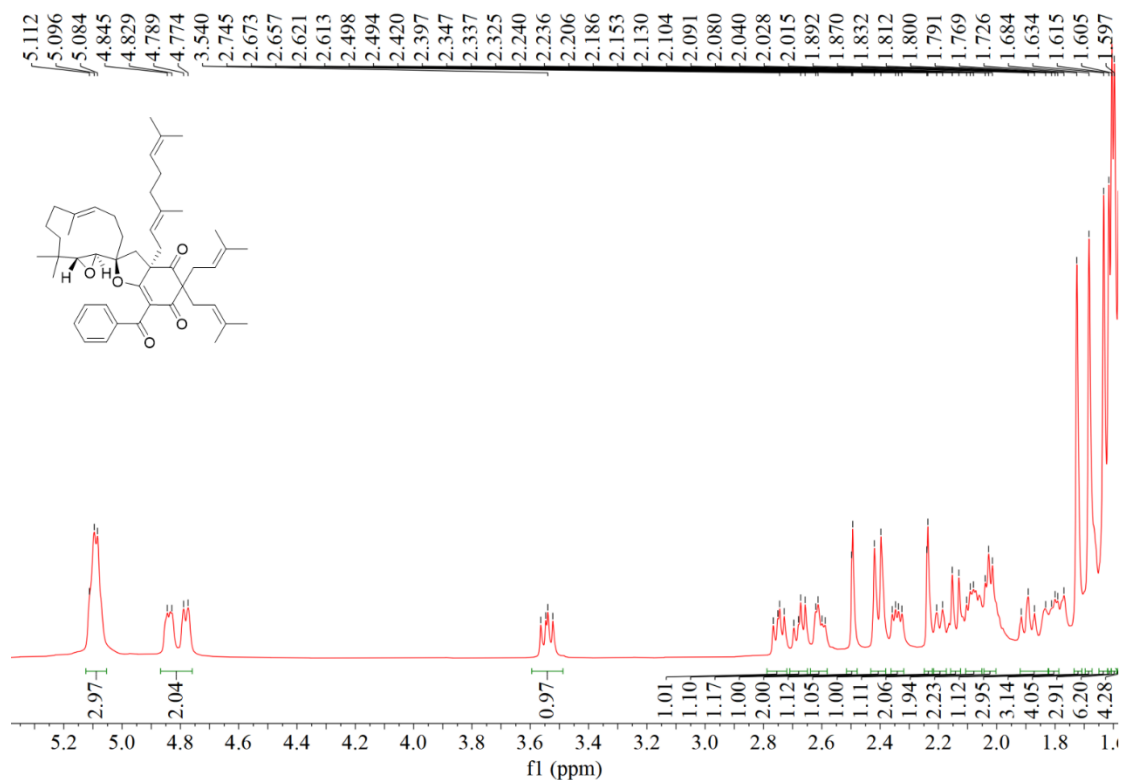

**Fig. S32.**  $^{13}\text{C}$  NMR and DEPT (150 MHz,  $\text{CDCl}_3$ ) spectra of hyperkouytin C (**3**).

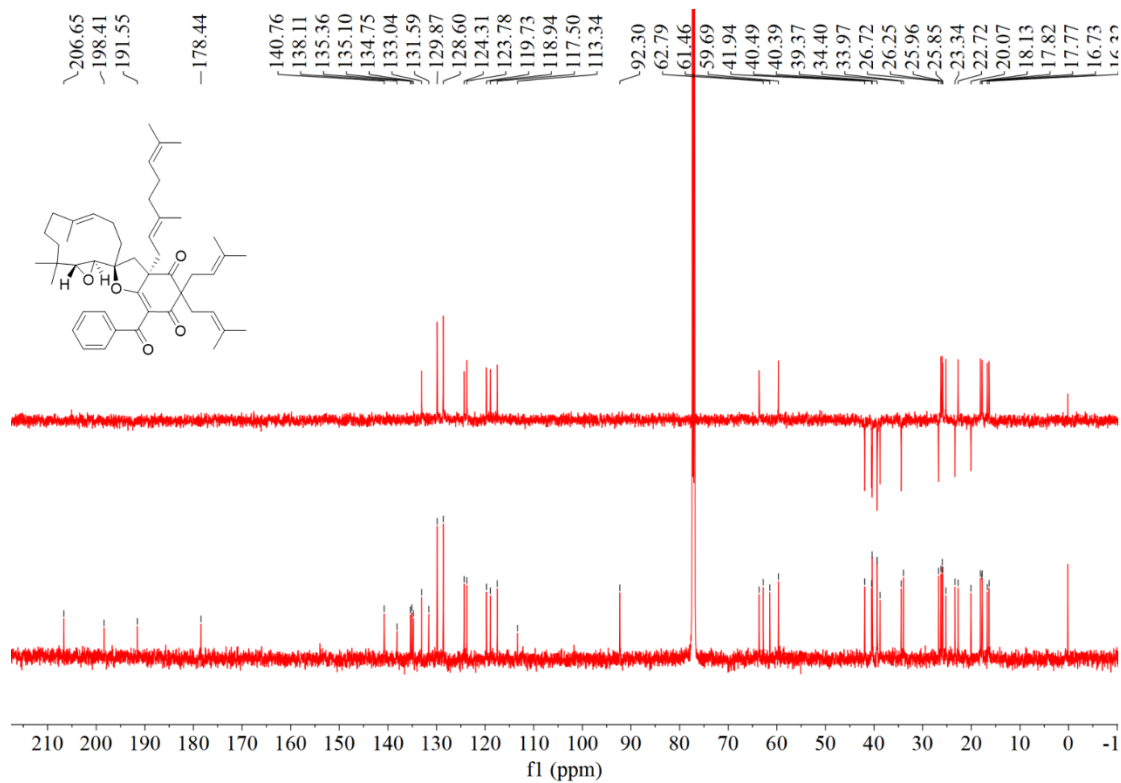

**Fig. S33.**  $^{13}\text{C}$  NMR and DEPT (150 MHz,  $\text{CDCl}_3$ ) spectra of hyperkouytin C (**3**).

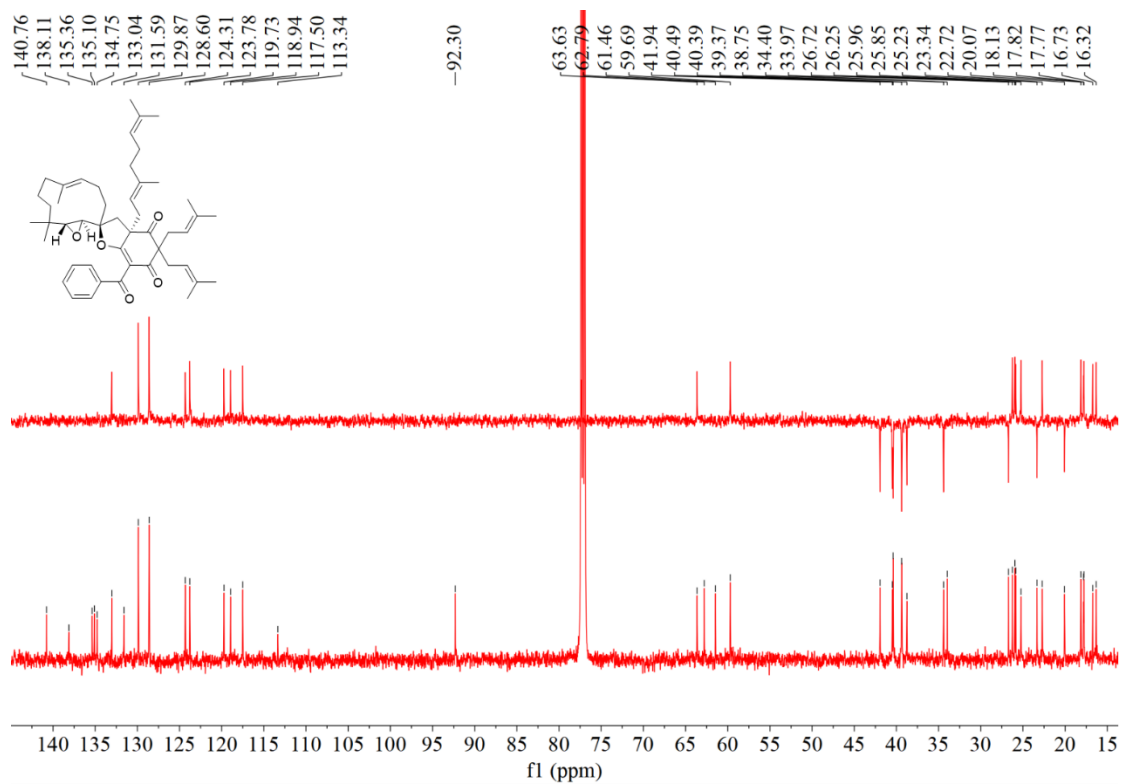

**Fig. S34.** HSQC (600 MHz,  $\text{CDCl}_3$ ) spectrum of hyperkouytin C (**3**).

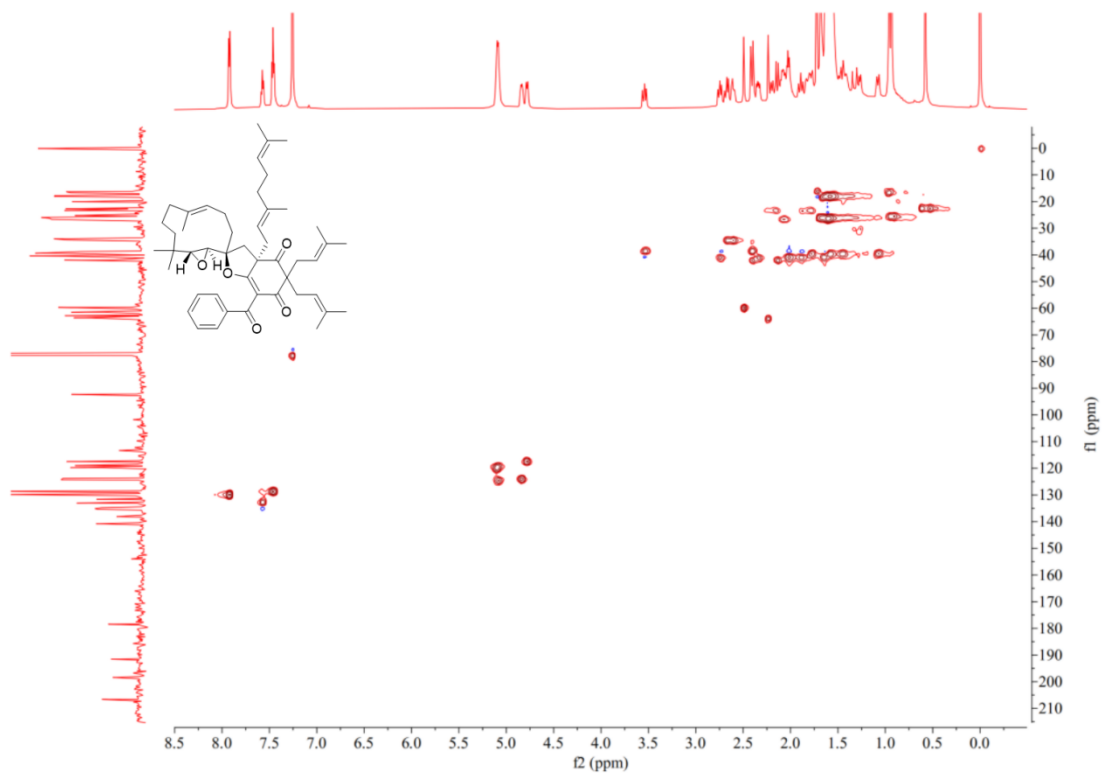

**Fig. S35.** HSQC (600 MHz, CDCl<sub>3</sub>) spectrum of hyperkouytin C (**3**).

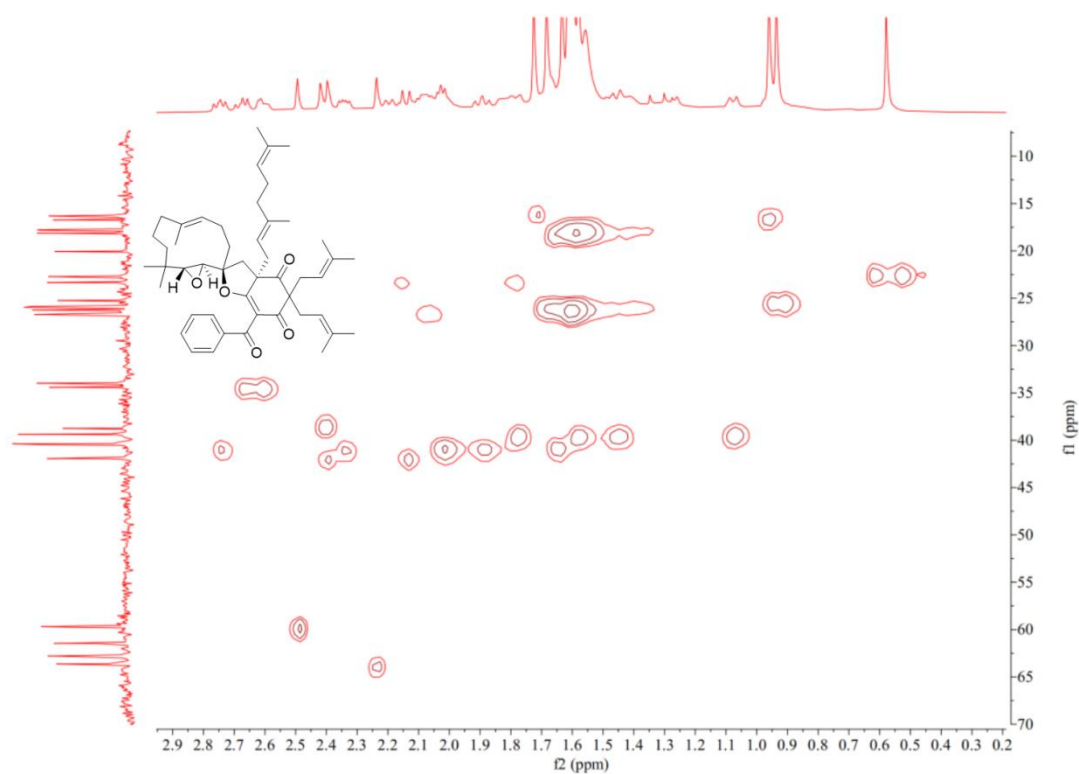

**Fig. S36.** <sup>1</sup>H-<sup>1</sup>H COSY (600 MHz, CDCl<sub>3</sub>) spectrum of hyperkouytin C (**3**).

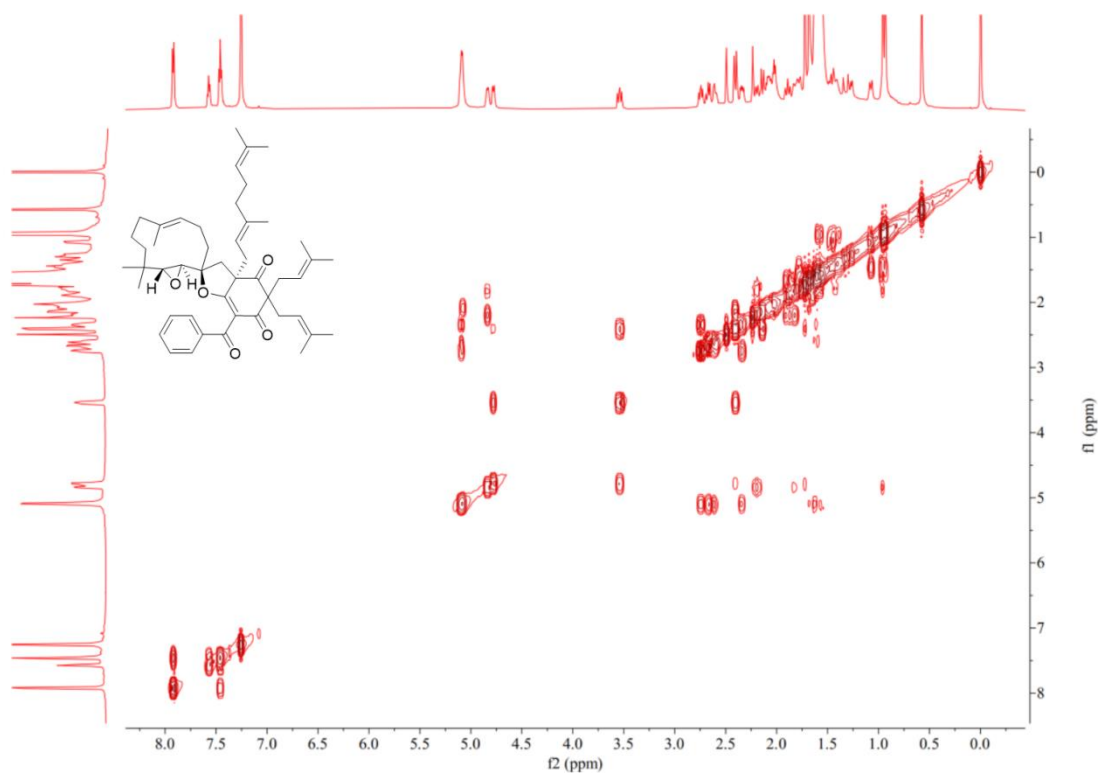

**Fig. S37.** HMBC (600 MHz, CDCl<sub>3</sub>) spectrum of hyperkouytin C (**3**).

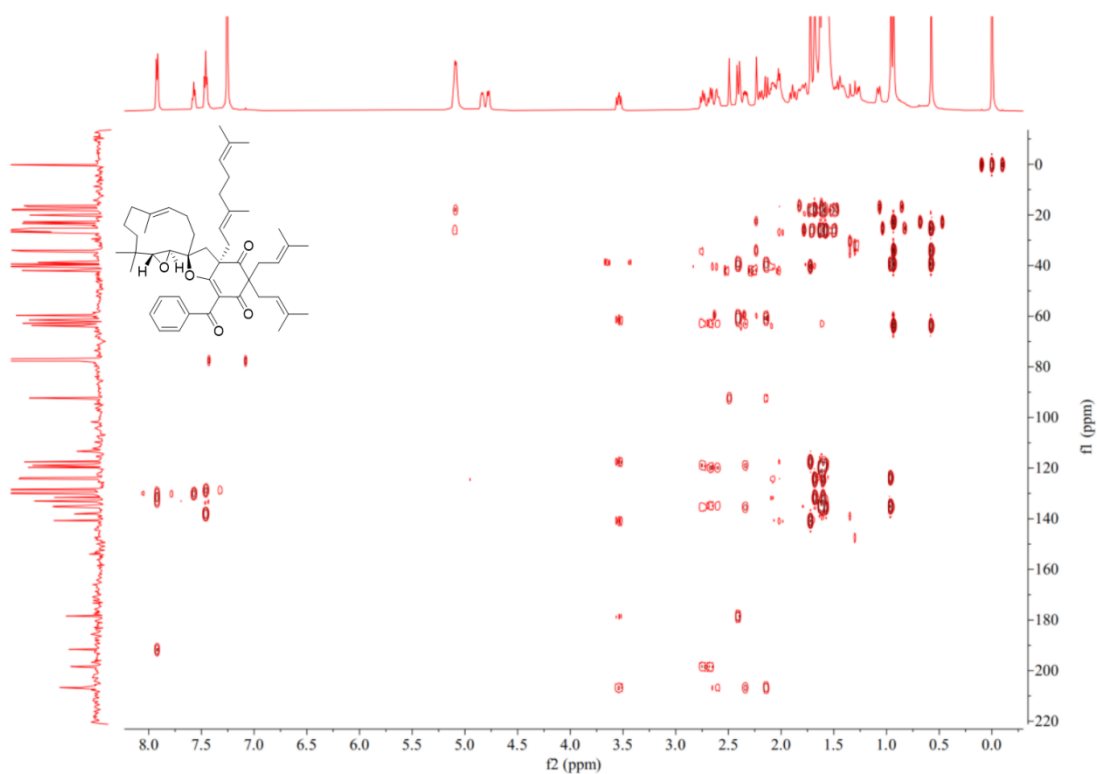

**Fig. S38.** HMBC (600 MHz, CDCl<sub>3</sub>) spectrum of hyperkouytin C (**3**).

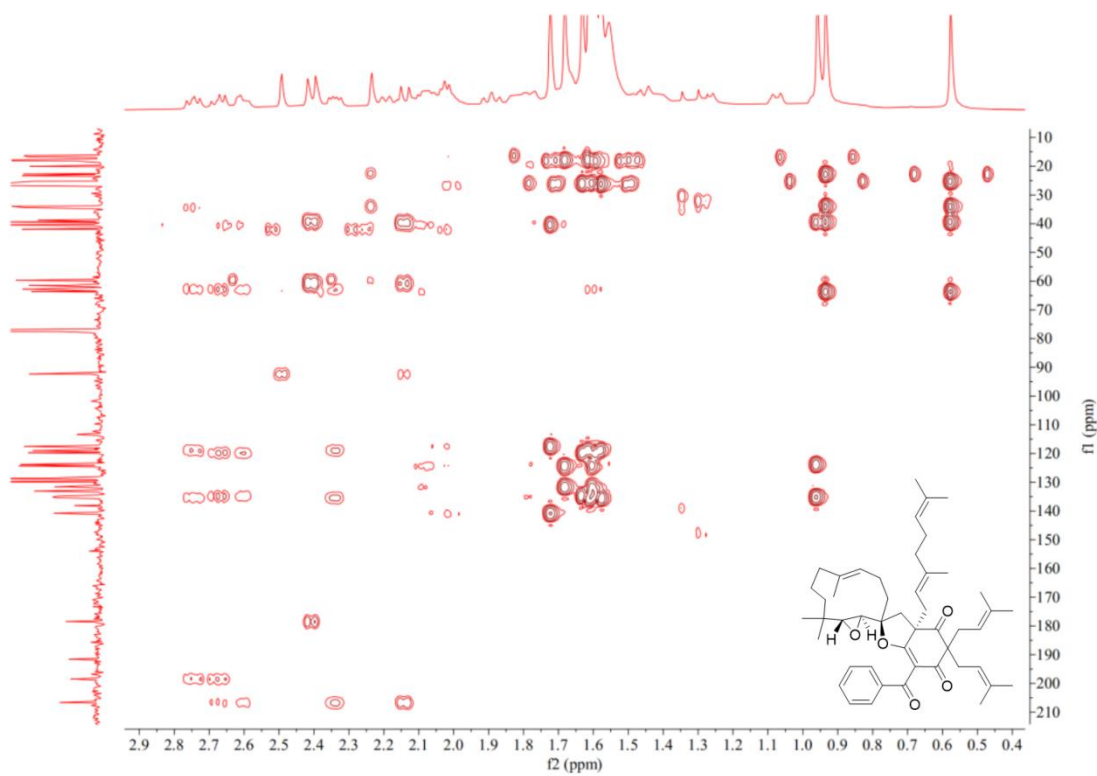

**Fig. S39.** NOESY (600 MHz, CDCl<sub>3</sub>) spectrum of hyperkoyutin C (**3**).

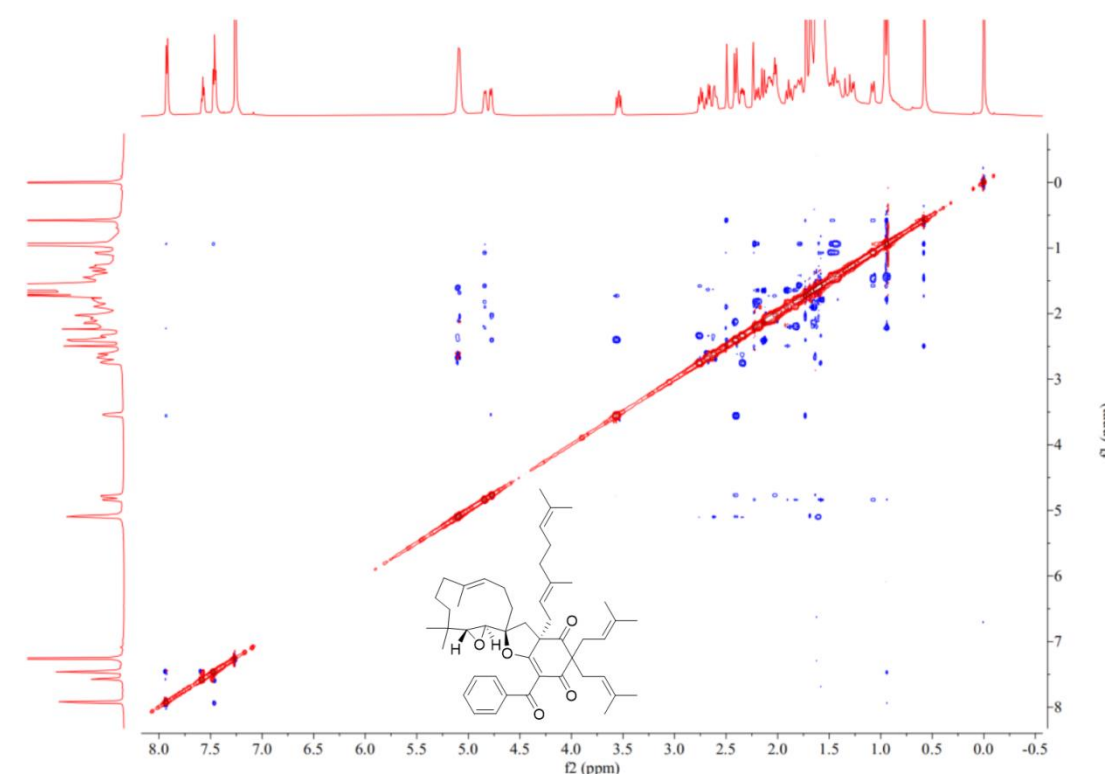

**Fig. S40.** IR spectrum of hyperkoyutin C (**3**).

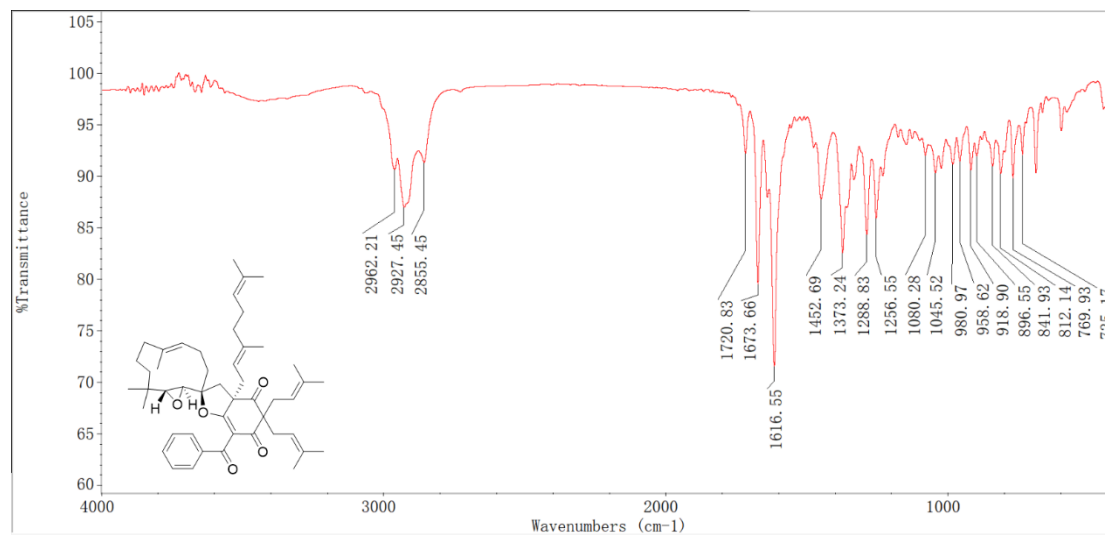

**Fig. S41.** UV spectrum of hyperkouytin C (**3**).

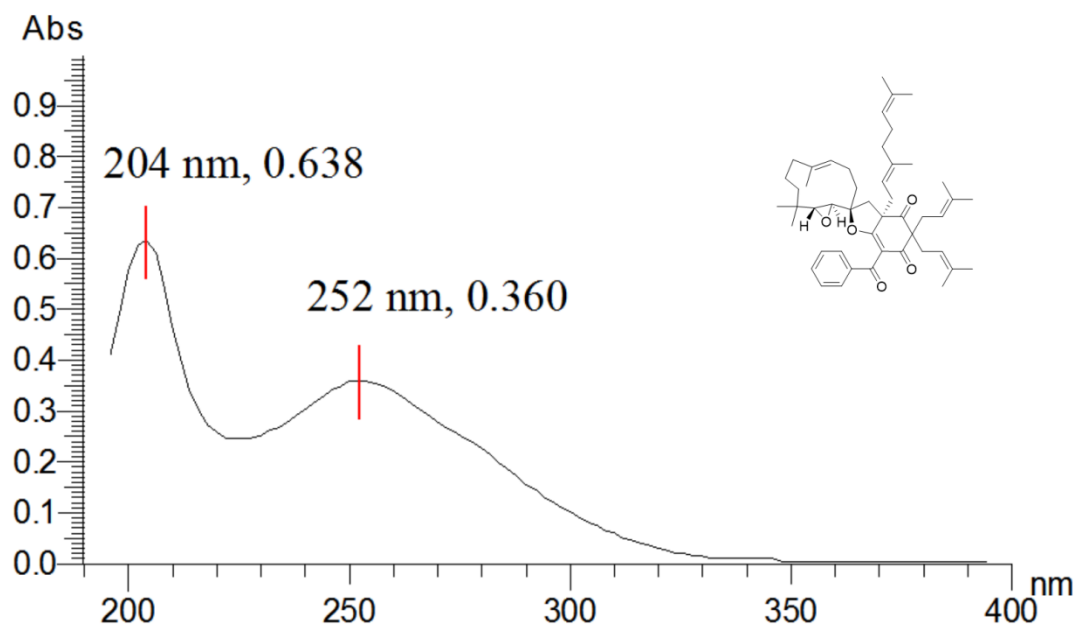

**Fig. S42.** Positive HR-ESIMS spectrum of hyperkouytin D (**4**).

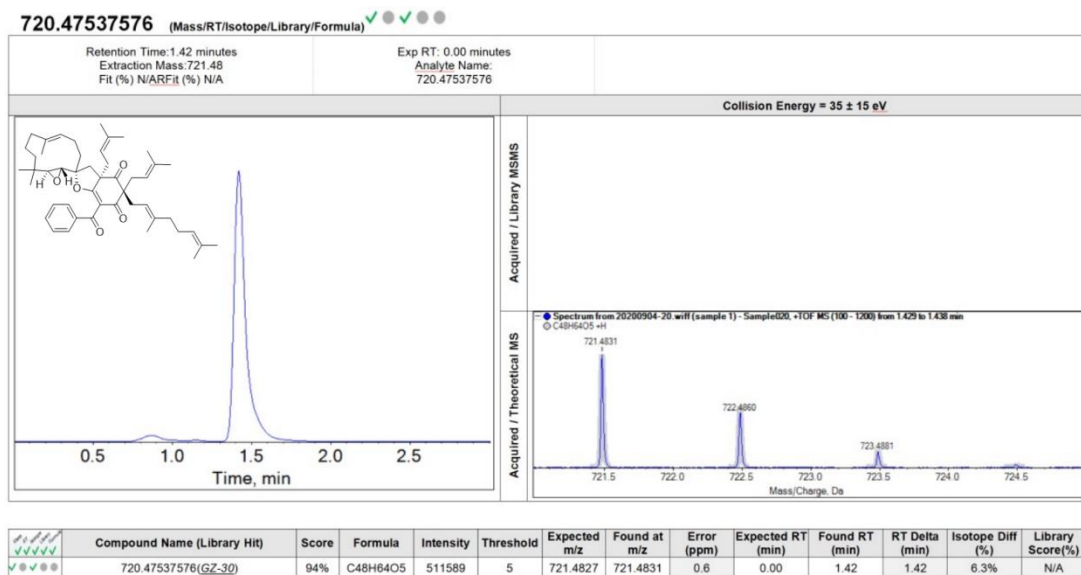

**Fig. S43.**  $^1\text{H}$  NMR (600 MHz,  $\text{CDCl}_3$ ) spectrum of hyperkouytin D (**4**).

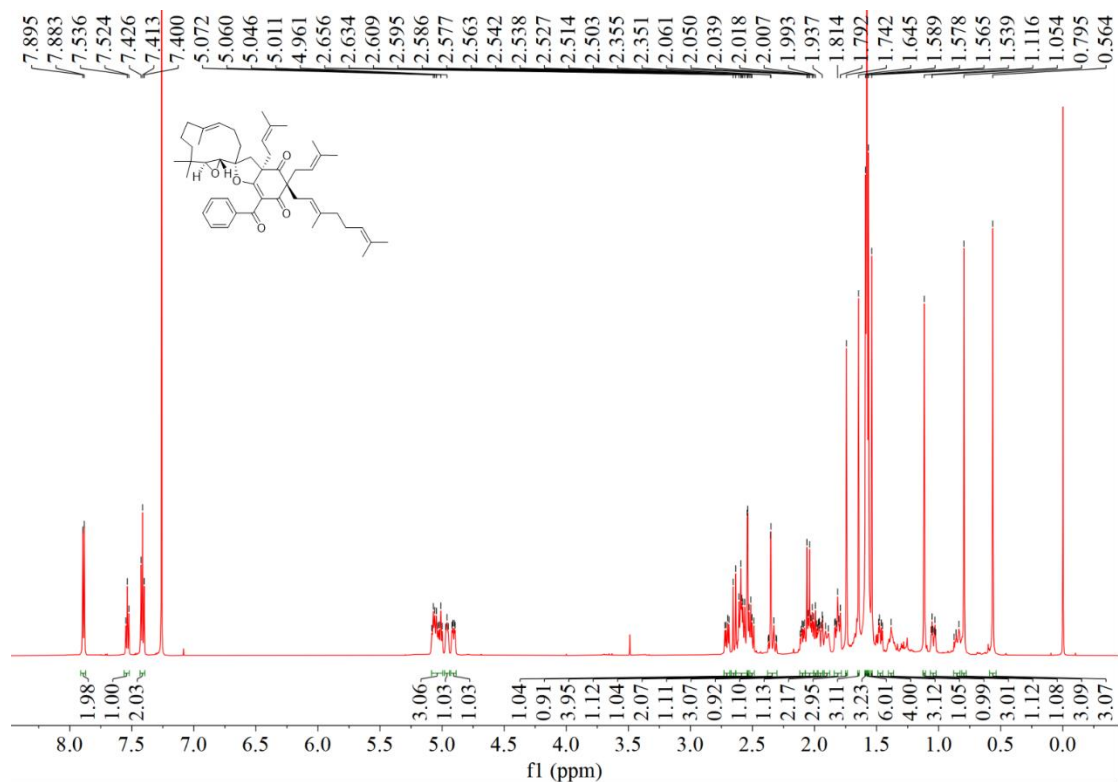

**Fig. S44.**  $^1\text{H}$  NMR (600 MHz,  $\text{CDCl}_3$ ) spectrum of hyperkouytin D (**4**).

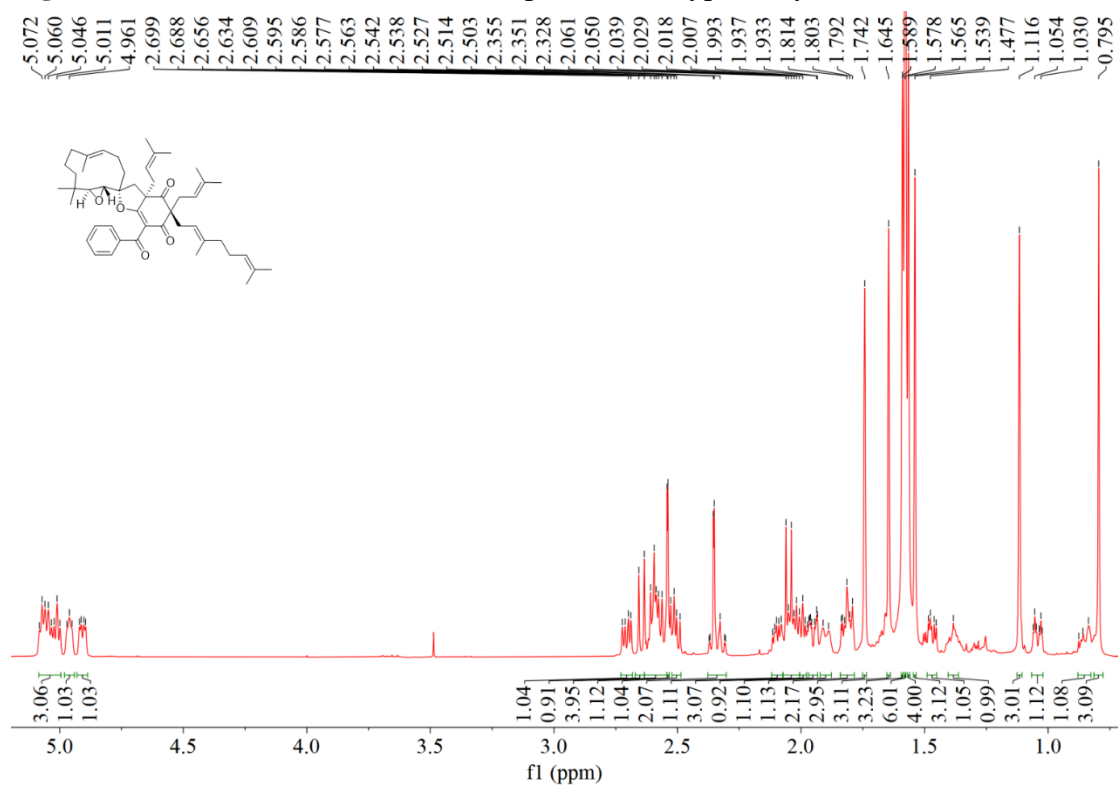



**Fig. S45.**  $^{13}\text{C}$  NMR and DEPT (150 MHz,  $\text{CDCl}_3$ ) spectra of hyperkouytin D (**4**).

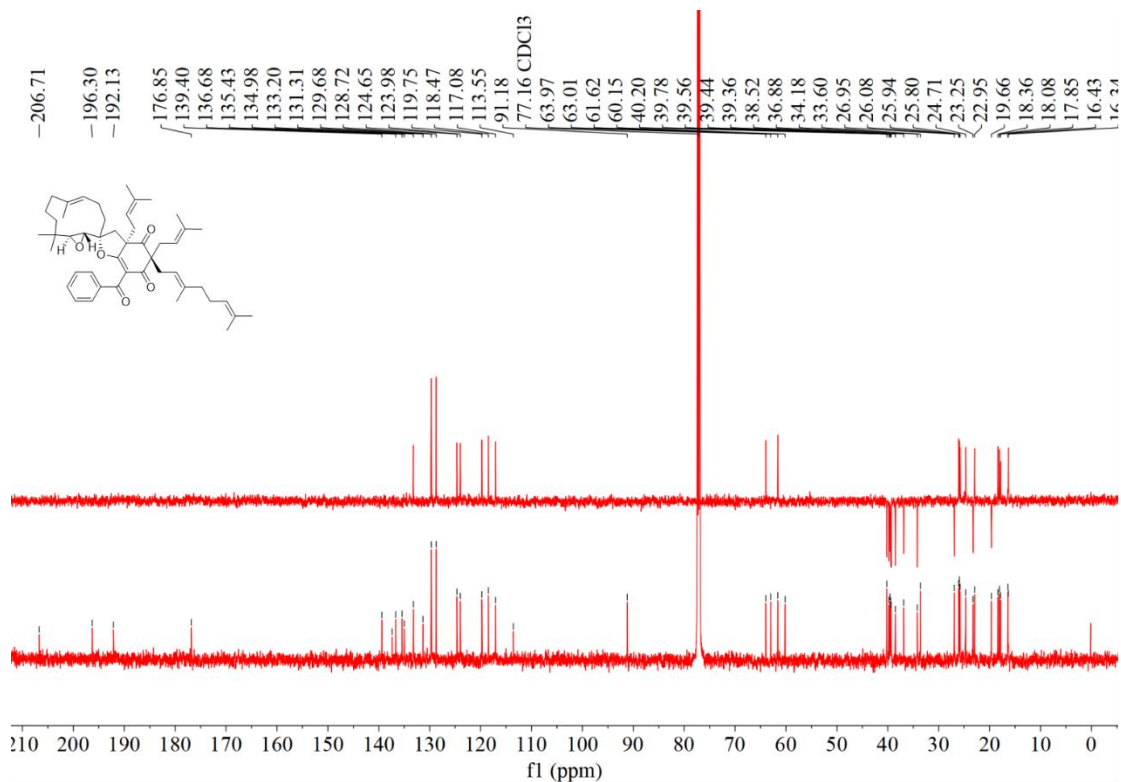

**Fig. S46.**  $^{13}\text{C}$  NMR and DEPT (150 MHz,  $\text{CDCl}_3$ ) spectra of hyperkouytin D (**4**).

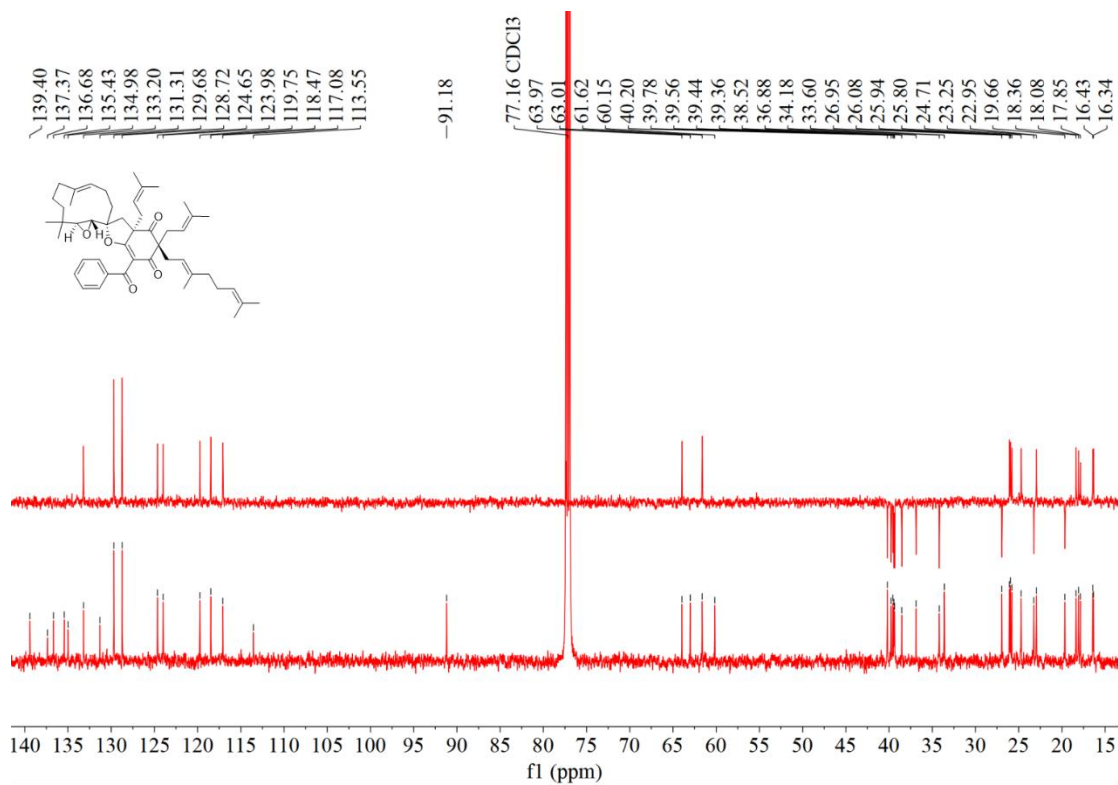

**Fig. S47.** HSQC (600 MHz, CDCl<sub>3</sub>) spectrum of hyperkouytin D (**4**).

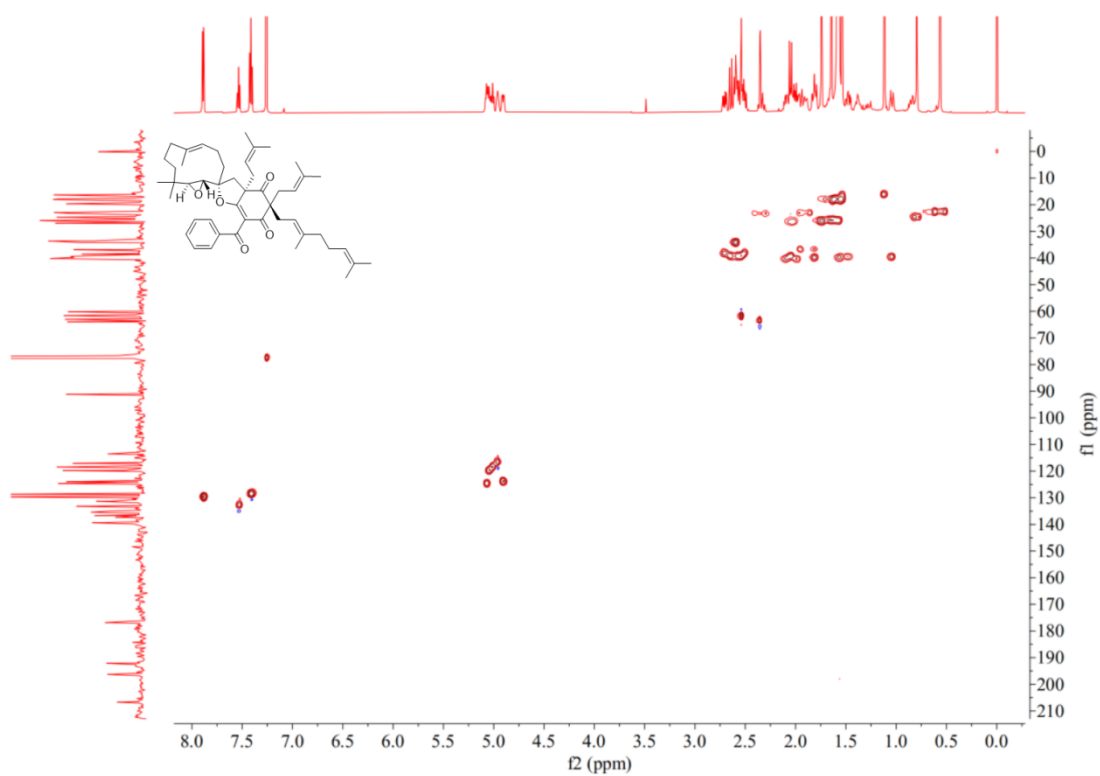

**Fig. S48.** HSQC (600 MHz, CDCl<sub>3</sub>) spectrum of hyperkouytin D (**4**).

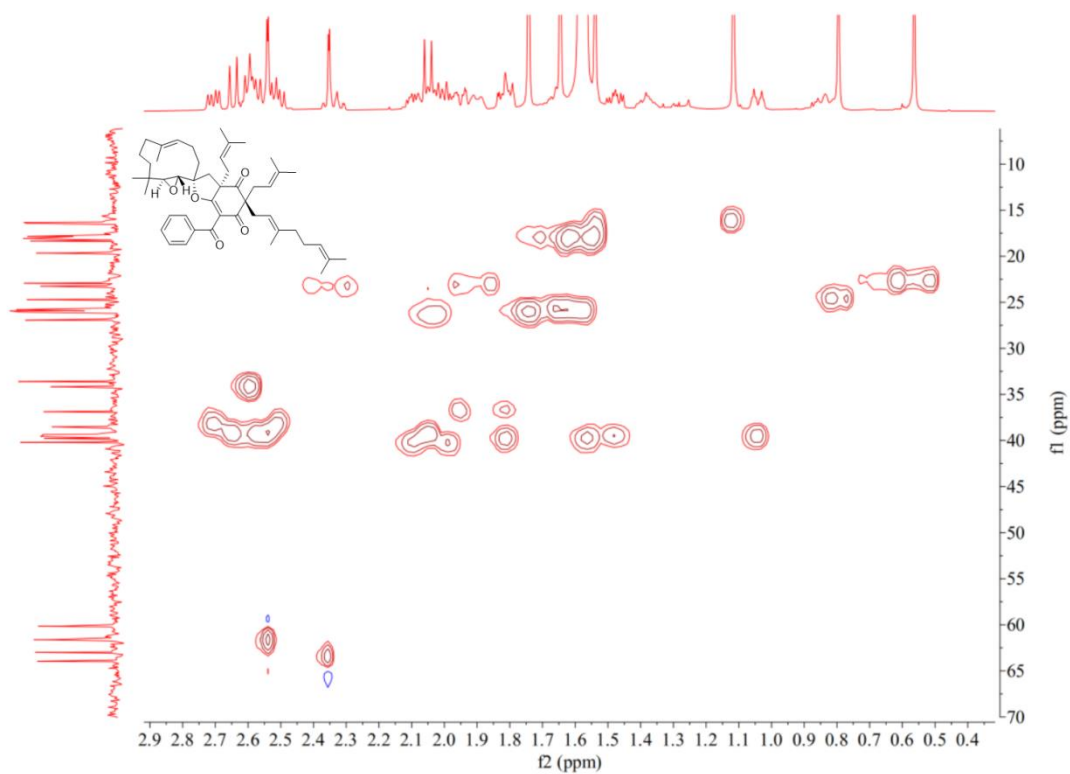

**Fig. S49.**  $^1\text{H}$ - $^1\text{H}$  COSY (600 MHz,  $\text{CDCl}_3$ ) spectrum of hyperkouytin D (**4**).

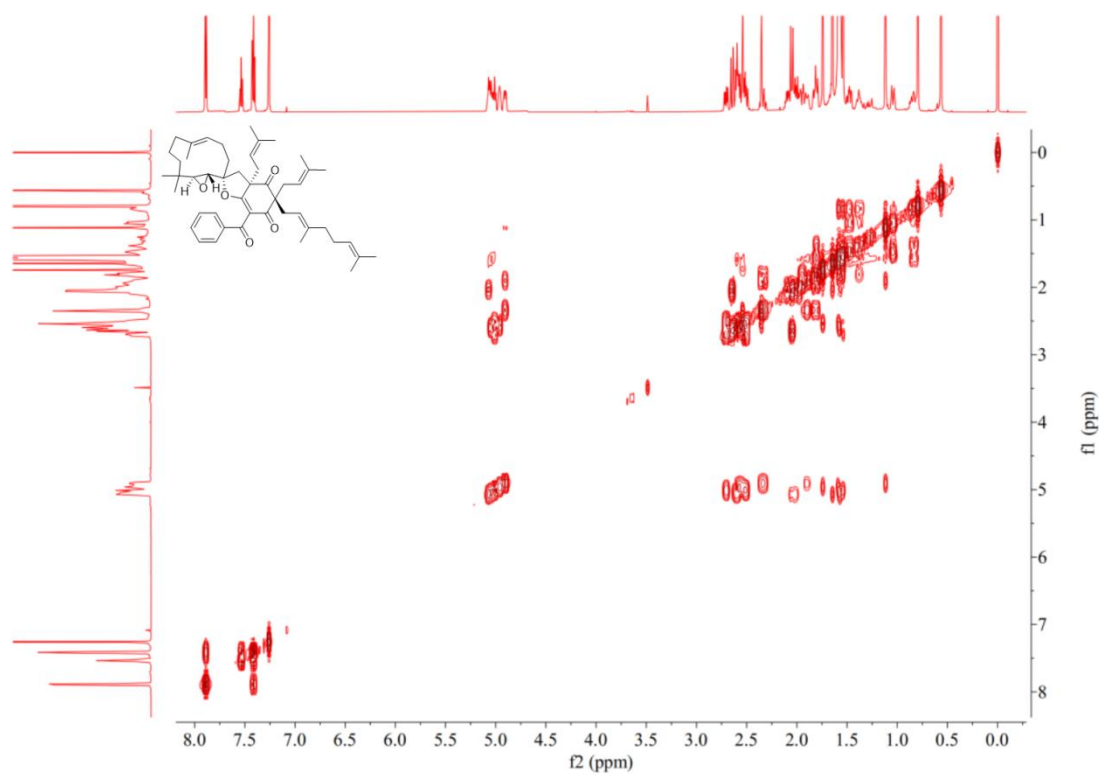

**Fig. S50.** HMBC (600 MHz,  $\text{CDCl}_3$ ) spectrum of hyperkouytin D (**4**).

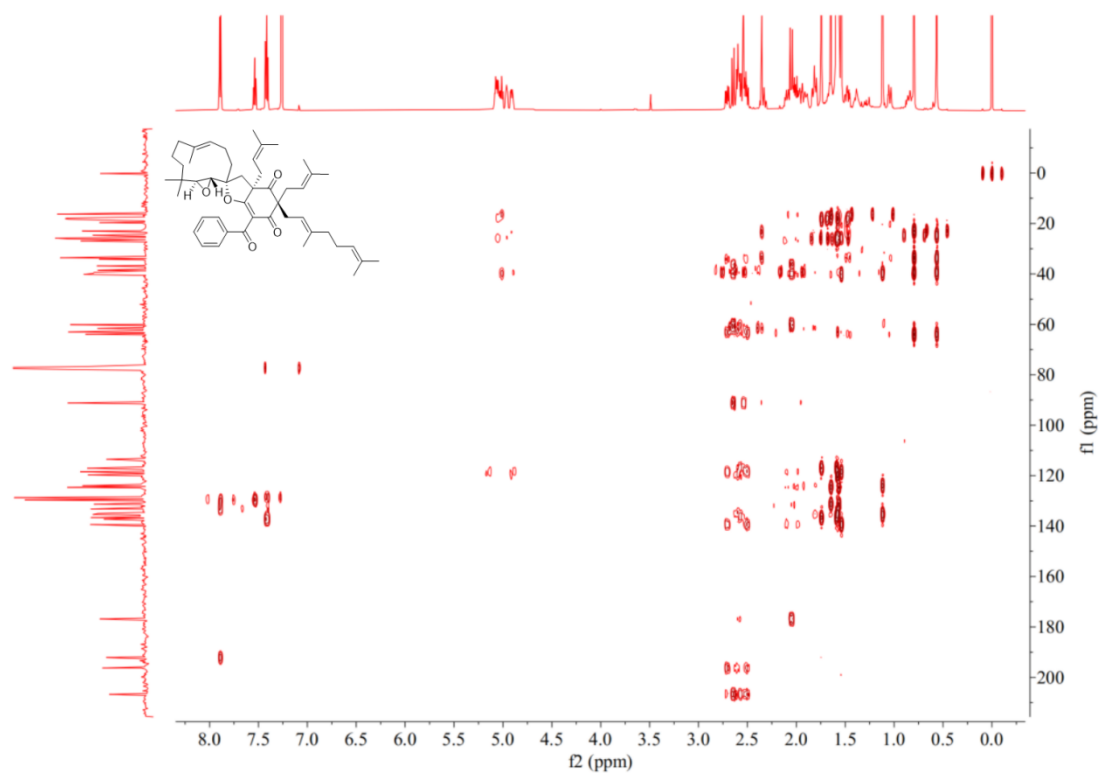

**Fig. S51.** HMBC (600 MHz, CDCl<sub>3</sub>) spectrum of hyperkouytin D (**4**).

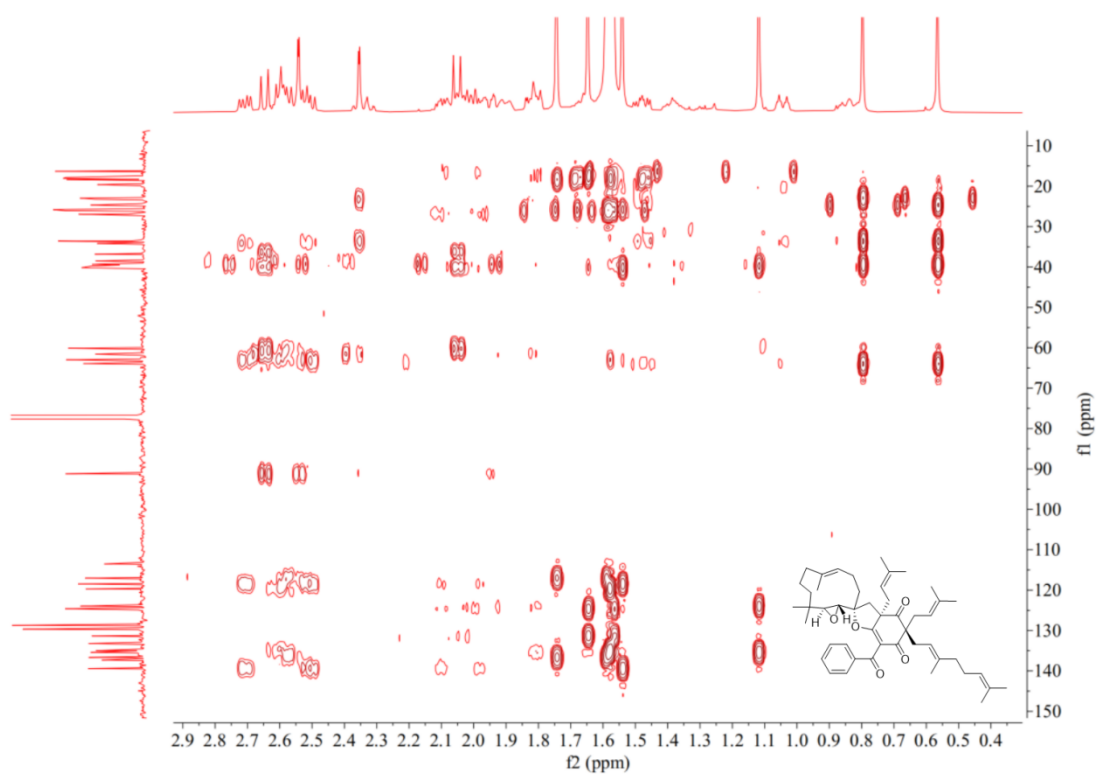

**Fig. S52.** NOESY (600 MHz, CDCl<sub>3</sub>) spectrum of hyperkouytin D (**4**).

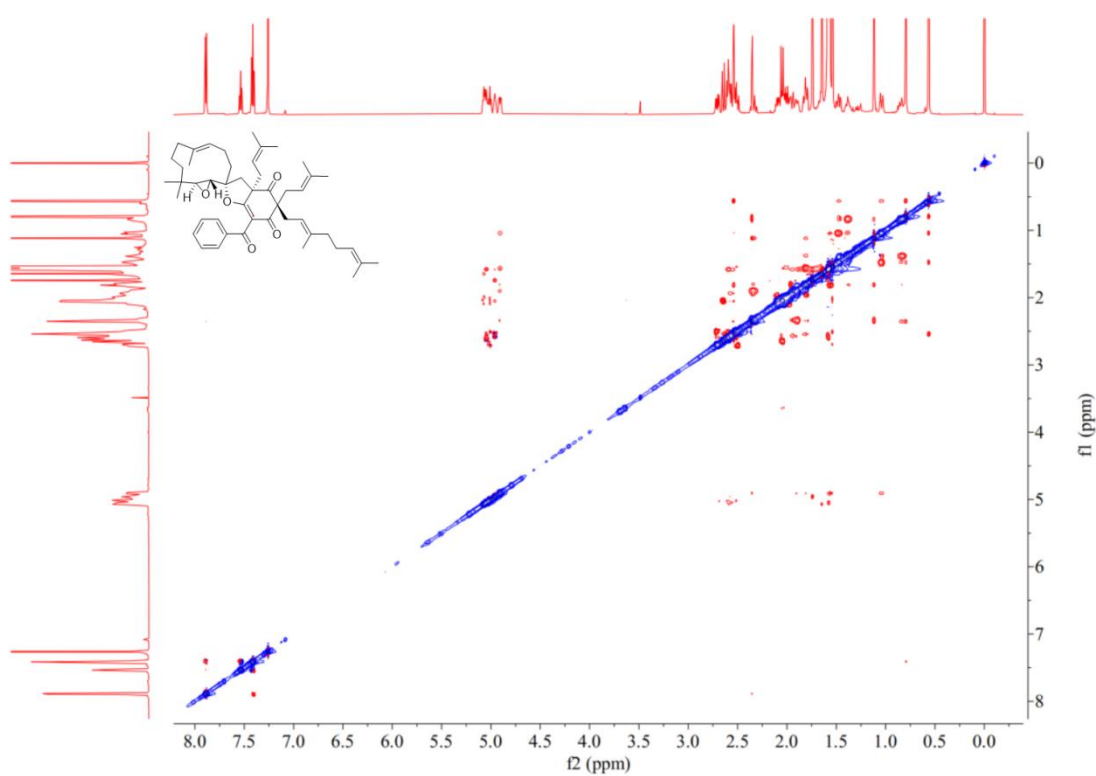

**Fig. S53.** IR spectrum of hyperkouytin D (4).

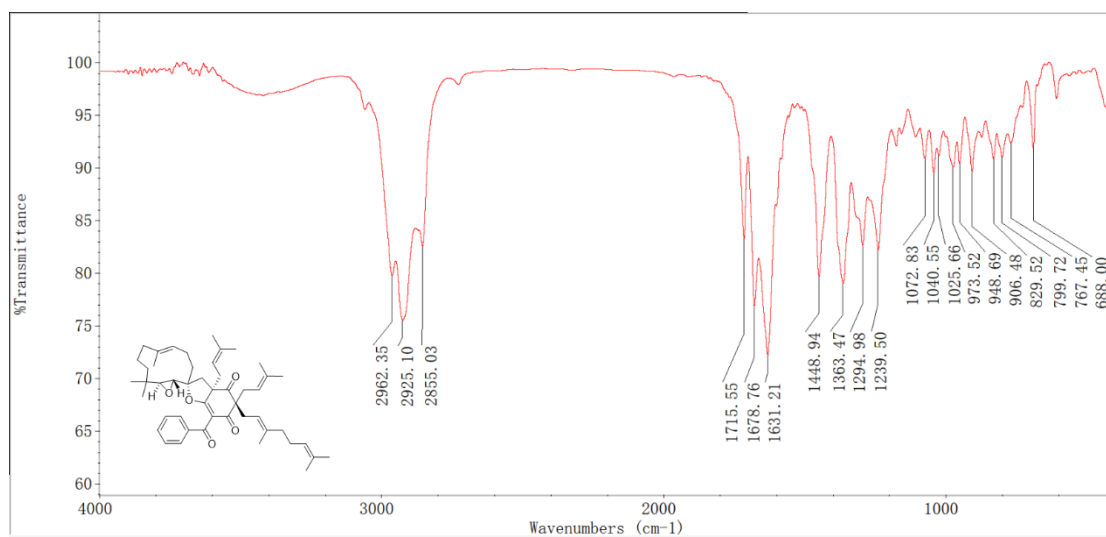

**Fig. S54.** UV spectrum of hyperkouytin D (4).

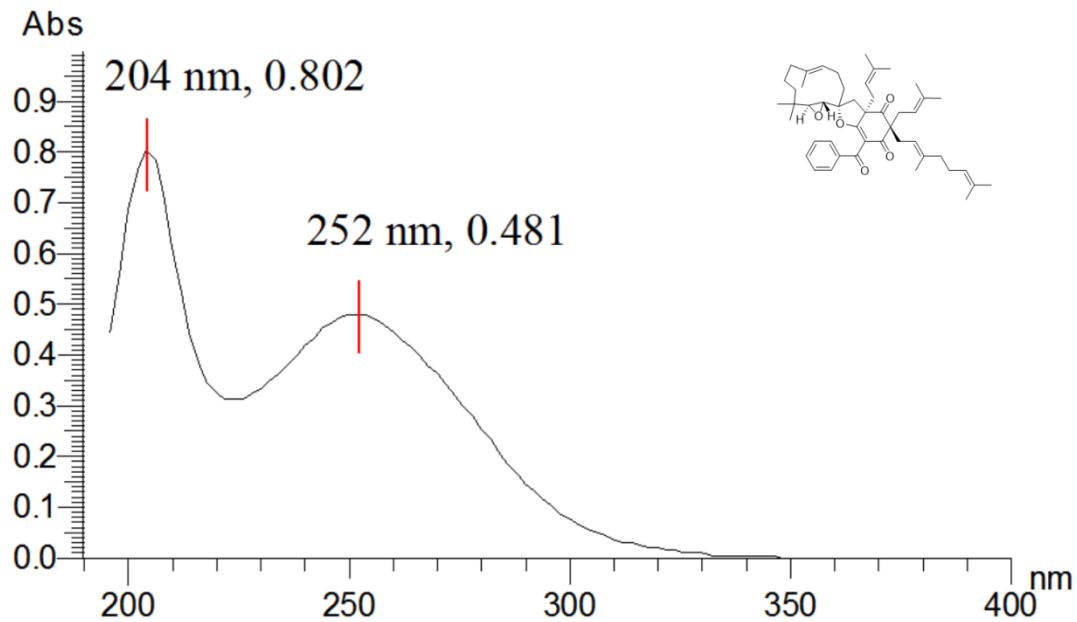

**Fig. S55.** Positive HR-ESIMS spectrum of hyperkouyтин E (**5**).

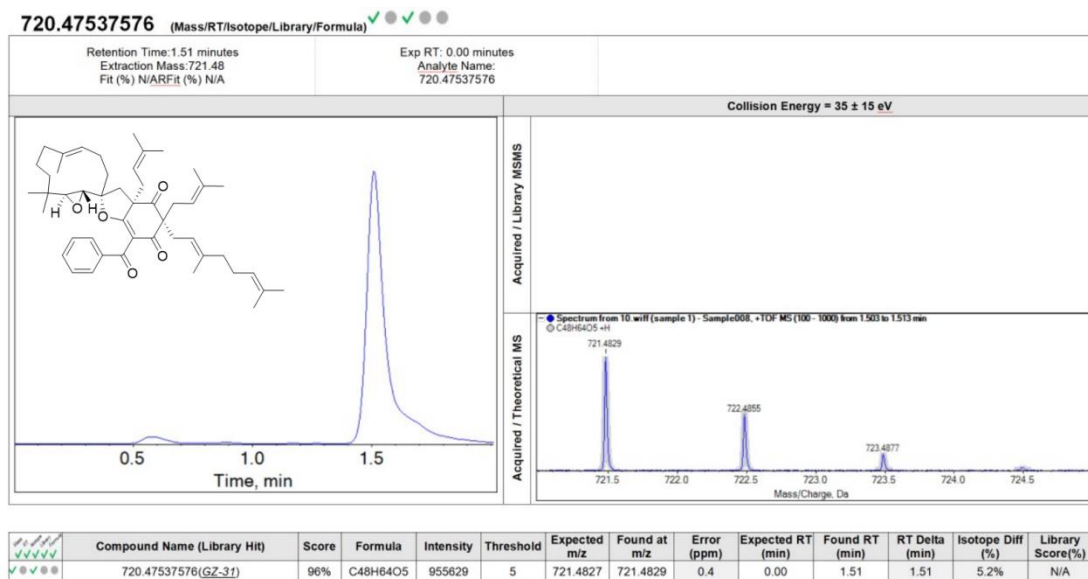

**Fig. S56.** <sup>1</sup>H NMR (600 MHz, CDCl<sub>3</sub>) spectrum of hyperkouyтин E (**5**).

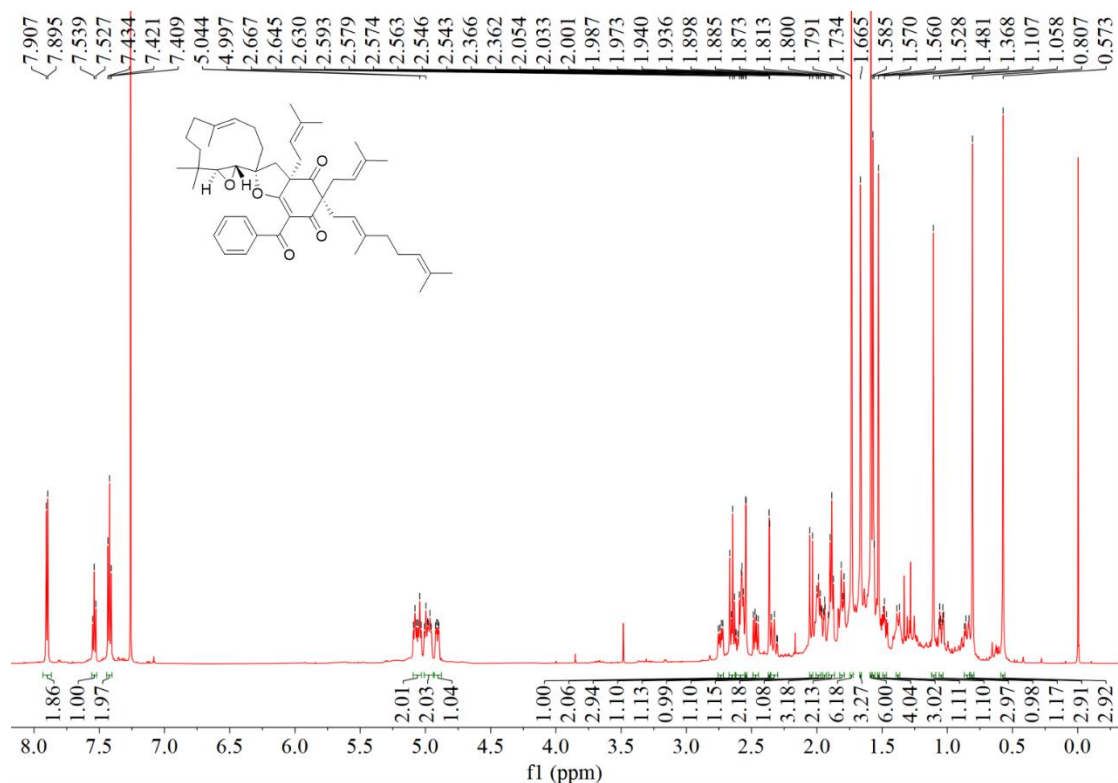

**Fig. S57.**  $^1\text{H}$  NMR (600 MHz,  $\text{CDCl}_3$ ) spectrum of hyperkouytin E (**5**).

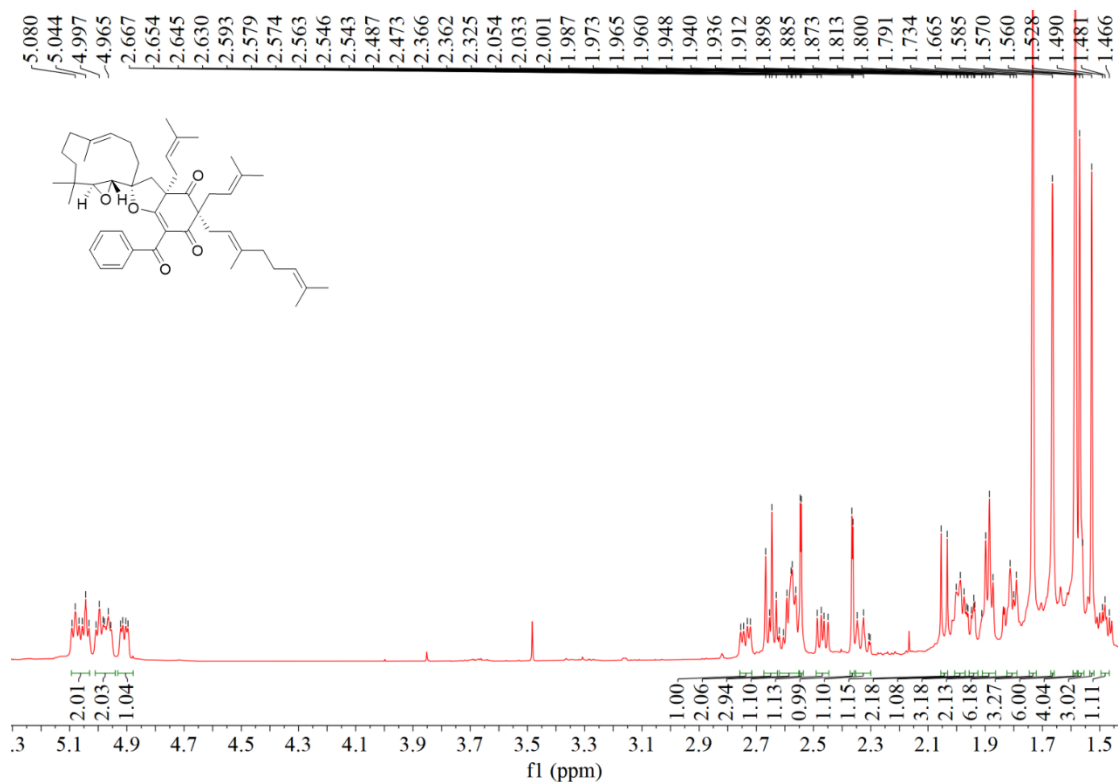

**Fig. S58.**  $^{13}\text{C}$  NMR and DEPT (150 MHz,  $\text{CDCl}_3$ ) spectra of hyperkouytin E (**5**).

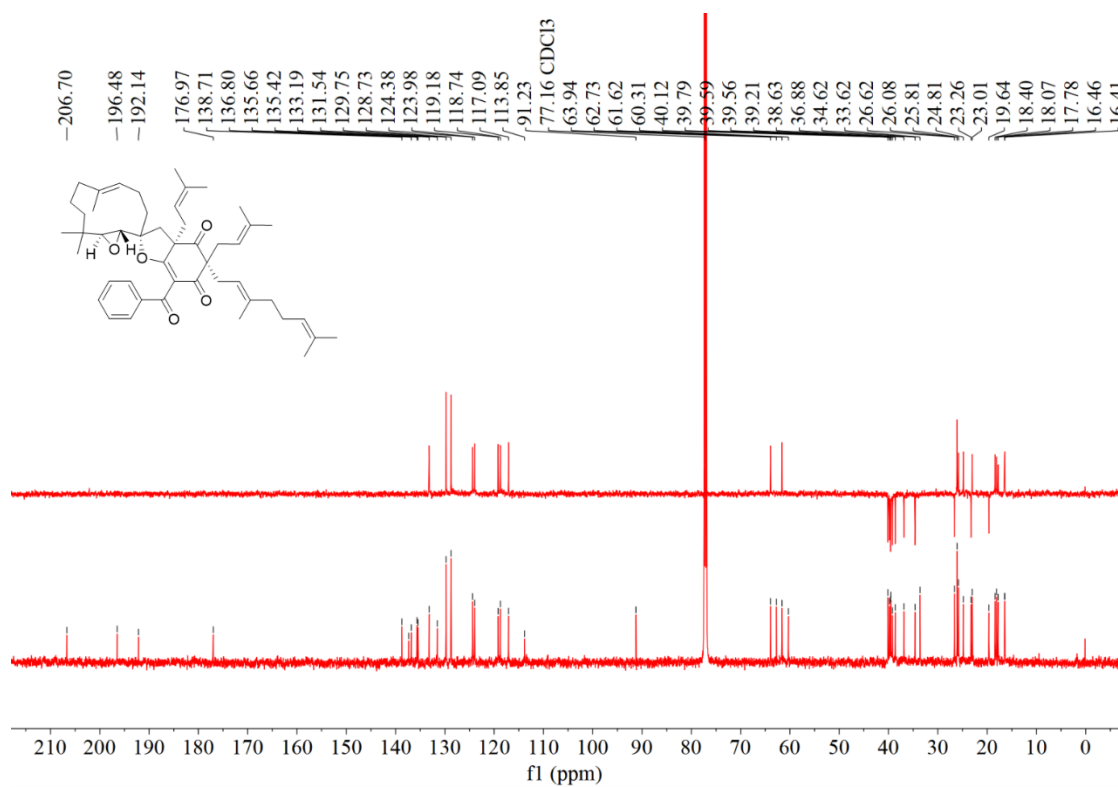

**Fig. S59.**  $^{13}\text{C}$  NMR and DEPT (150 MHz,  $\text{CDCl}_3$ ) spectra of hyperkouytin E (**5**).

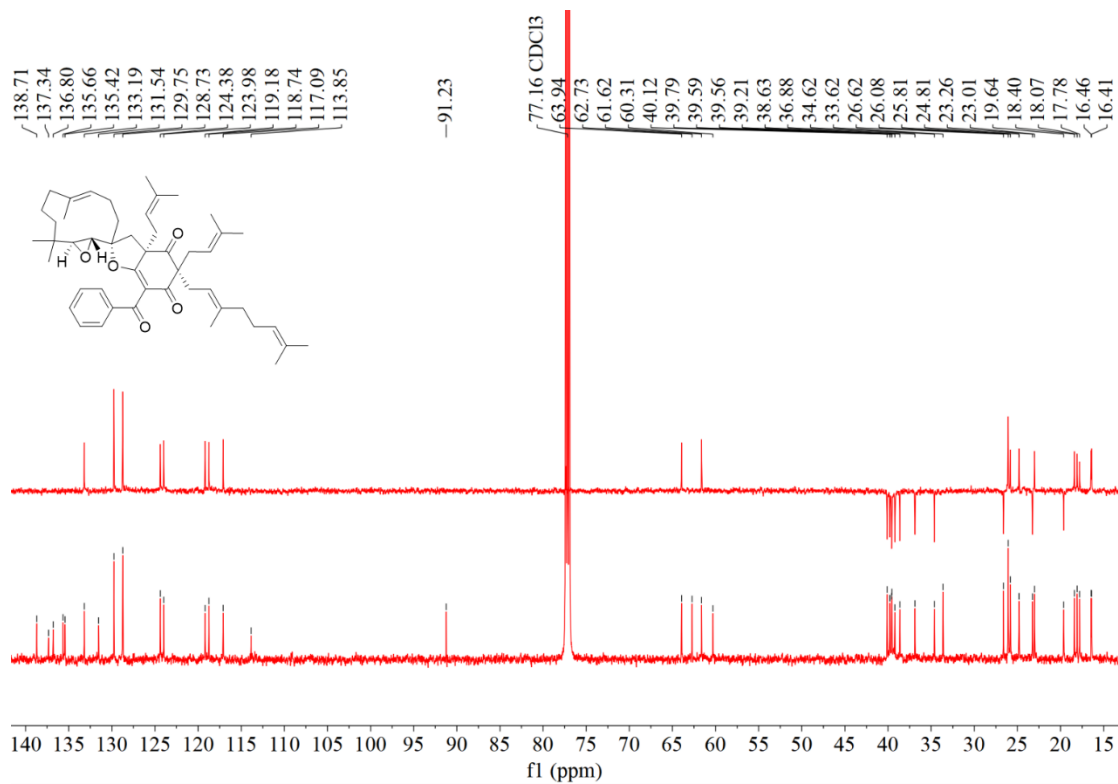

**Fig. S60.** HSQC (600 MHz,  $\text{CDCl}_3$ ) spectrum of hyperkouytin E (**5**).

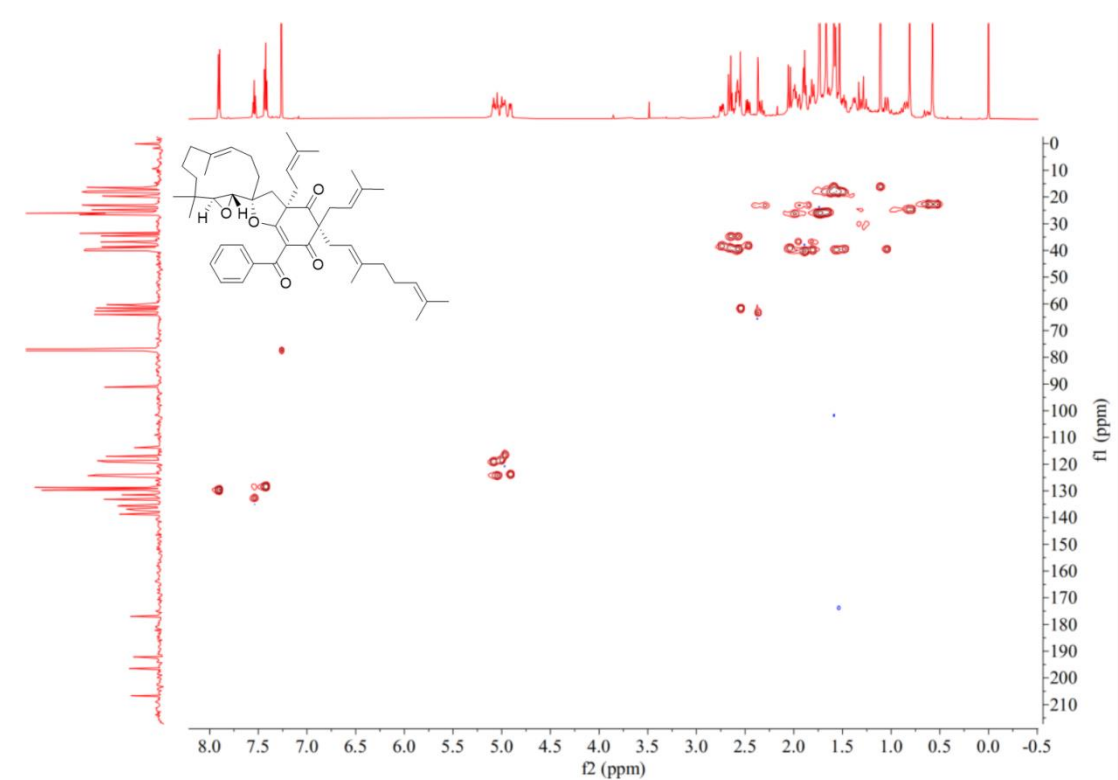



**Fig. S61.** HSQC (600 MHz, CDCl<sub>3</sub>) spectrum of hyperkouytin E (**5**).

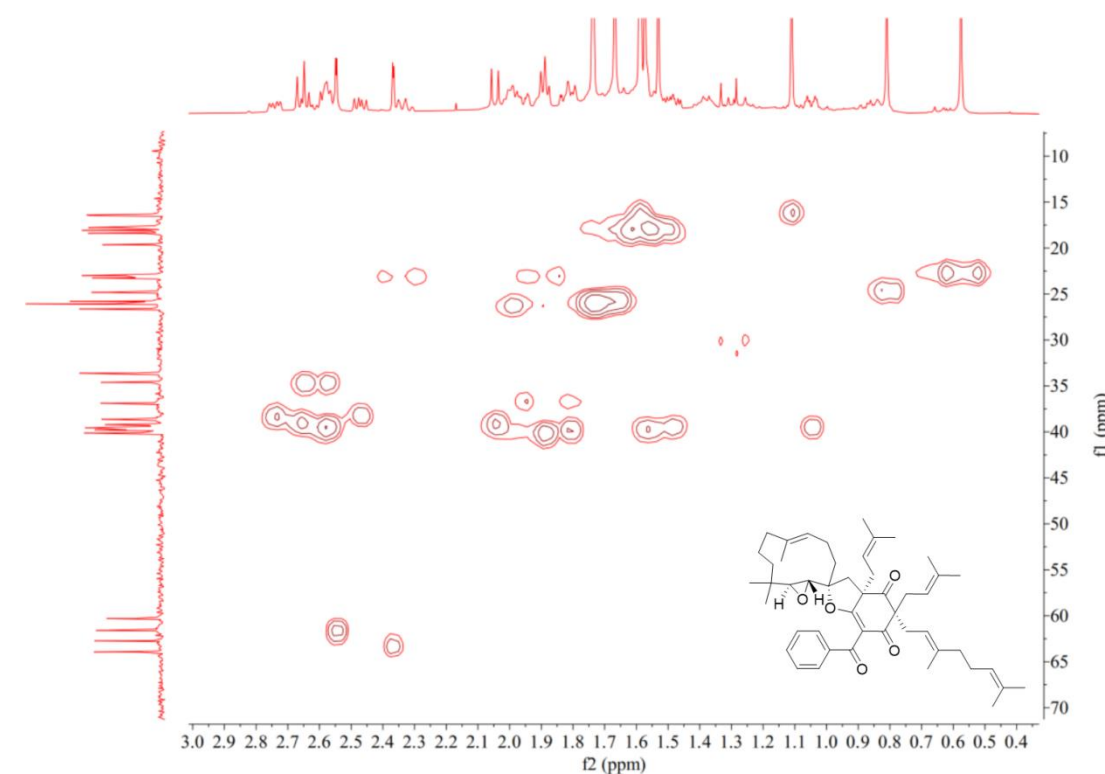

**Fig. S62.** <sup>1</sup>H-<sup>1</sup>H COSY (600 MHz, CDCl<sub>3</sub>) spectrum of hyperkouytin E (**5**).

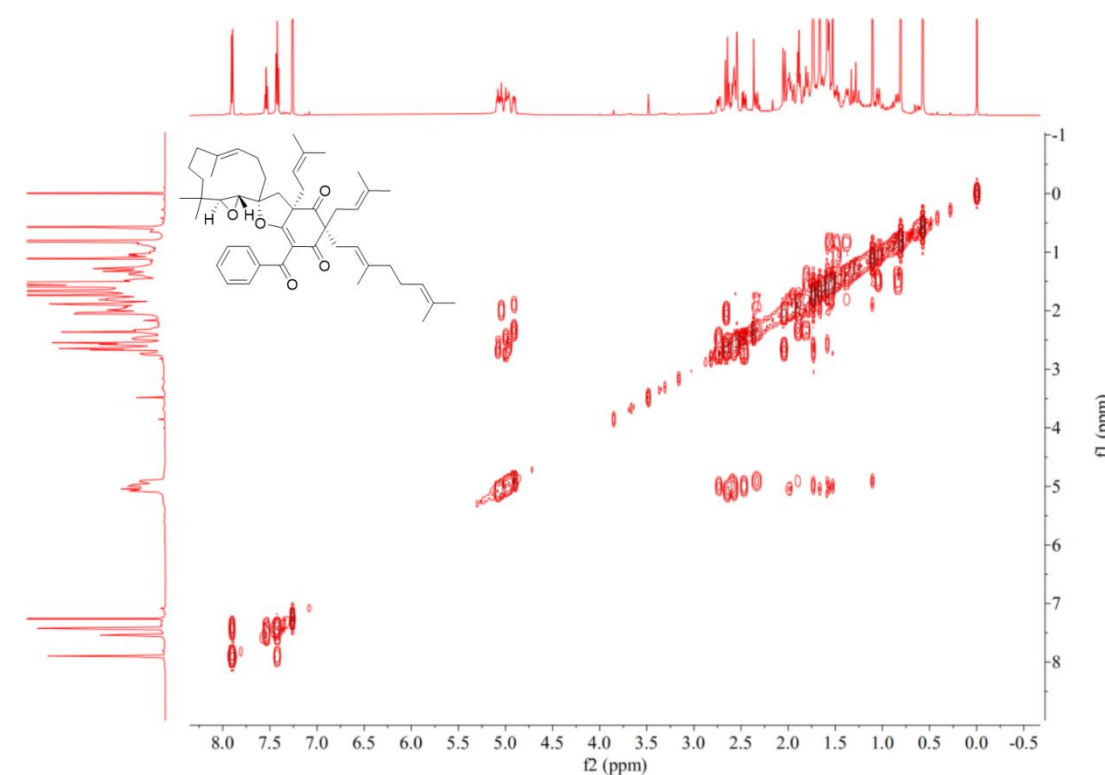

**Fig. S63.** HMBC (600 MHz, CDCl<sub>3</sub>) spectrum of hyperkouytin E (5).

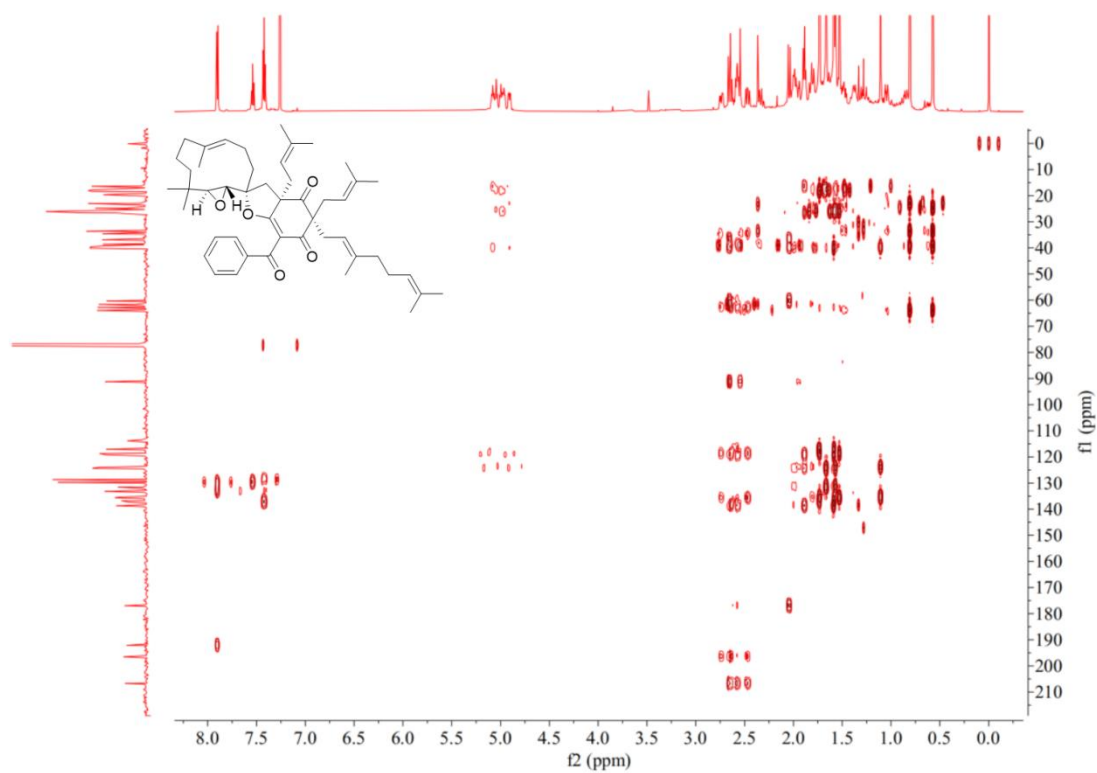

**Fig. S64.** HMBC (600 MHz, CDCl<sub>3</sub>) spectrum of hyperkouytin E (5).

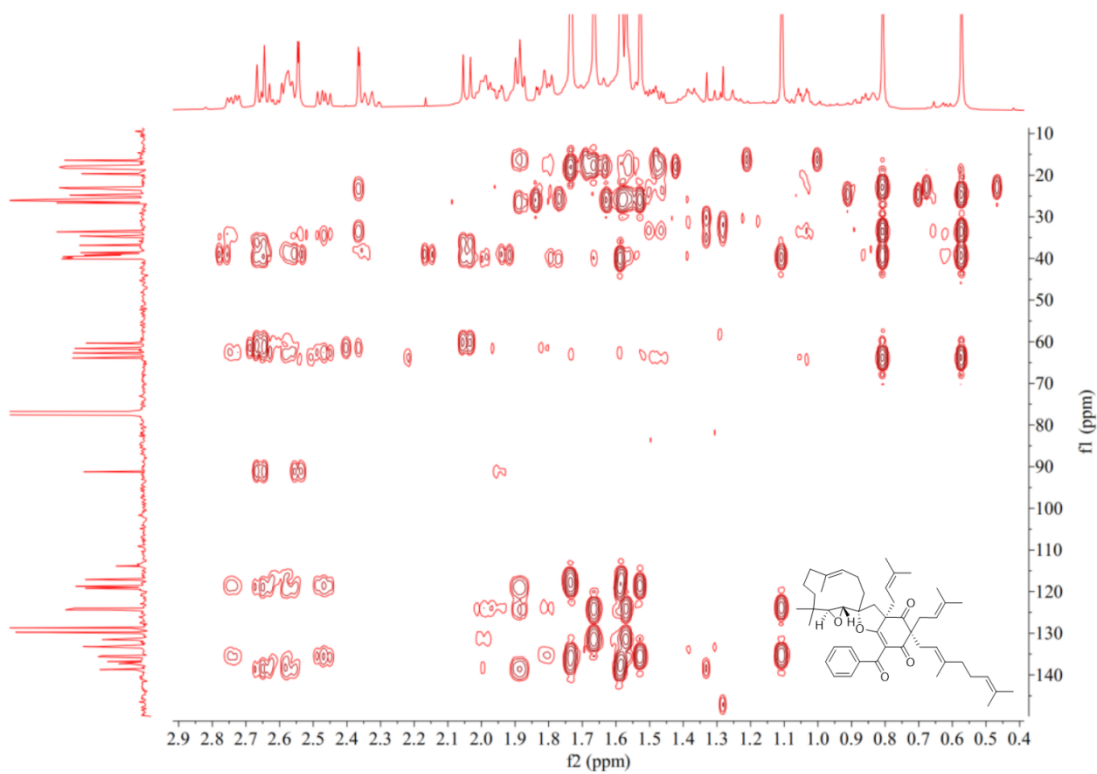

**Fig. S65.** NOESY (600 MHz, CDCl<sub>3</sub>) spectrum of hyperkouyitin E (**5**).

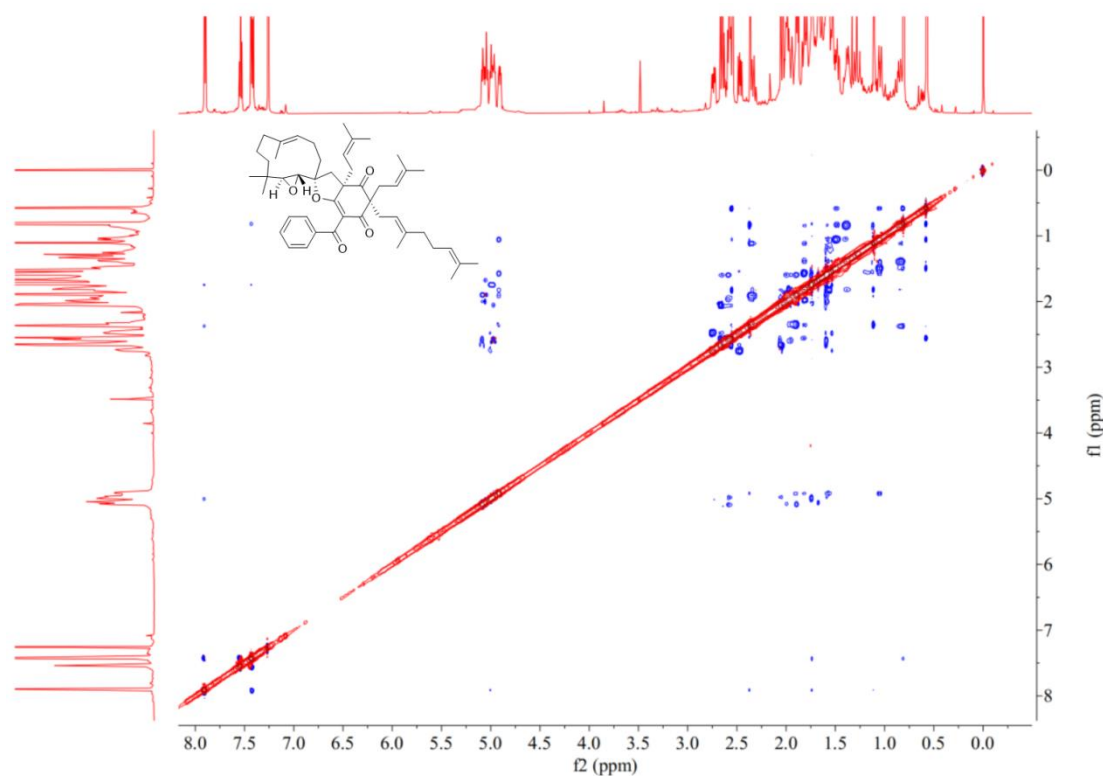

**Fig. S66.** IR spectrum of hyperkouyitin E (**5**).

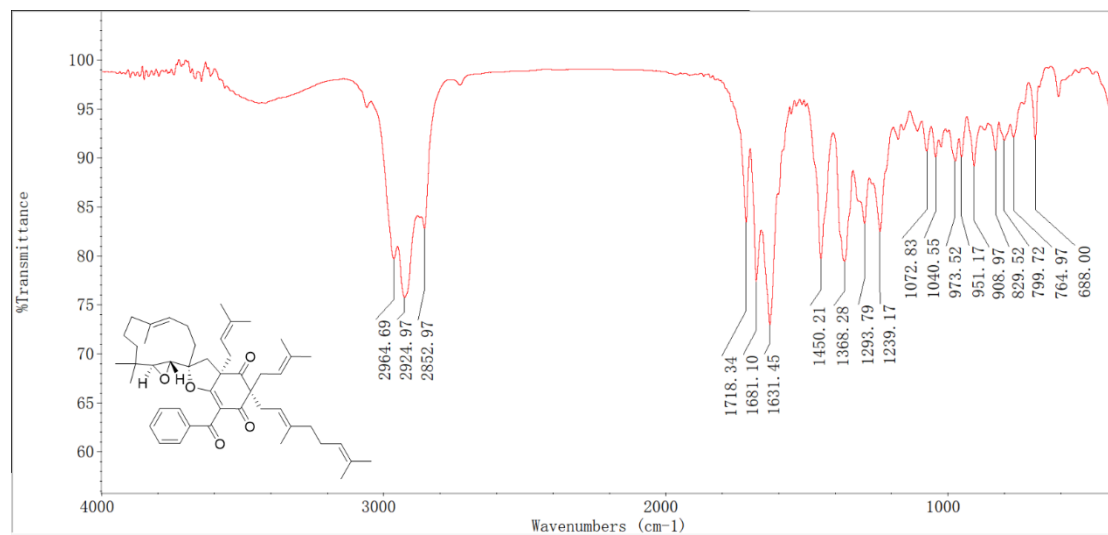

**Fig. S67.** UV spectrum of hyperkouytin E (**5**).

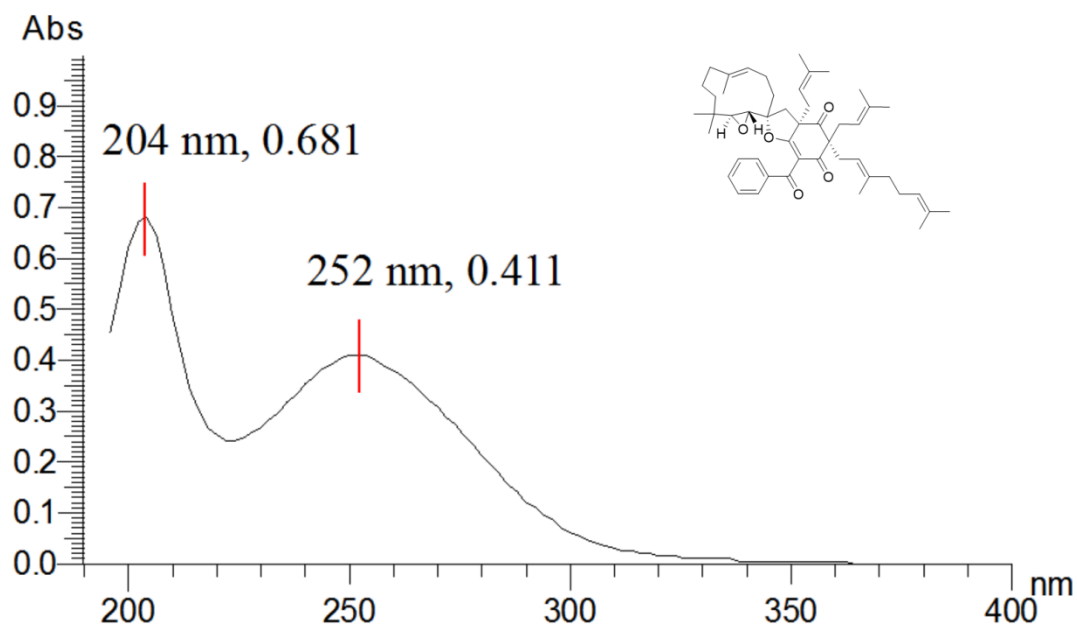

**Fig. S68.** Positive HR-ESIMS spectrum of hyperkouytin F (**6**).

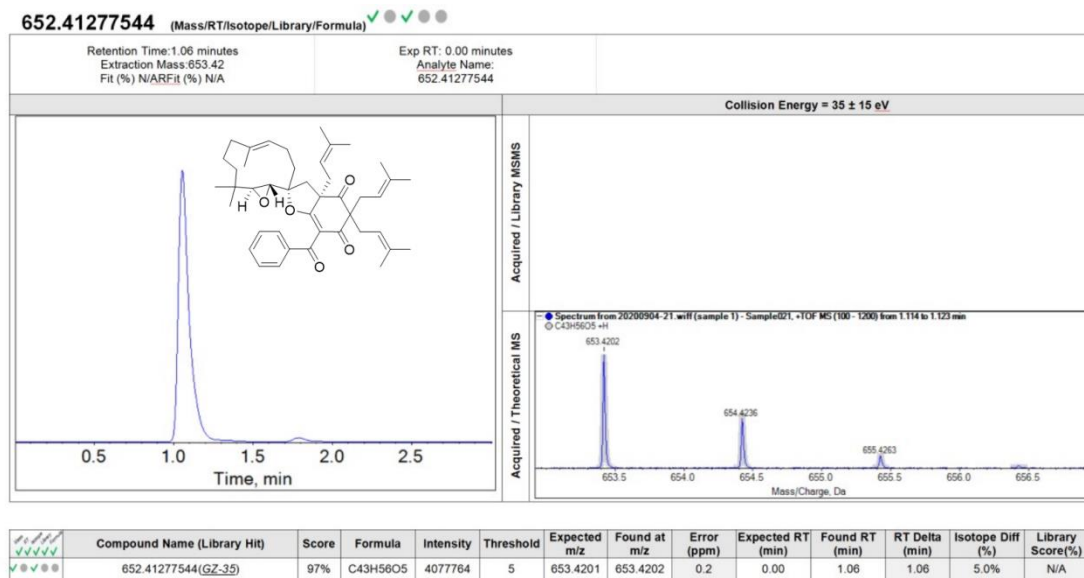

**Fig. S69.**  $^1\text{H}$  NMR (600 MHz,  $\text{CDCl}_3$ ) spectrum of hyperkouytin F (**6**).

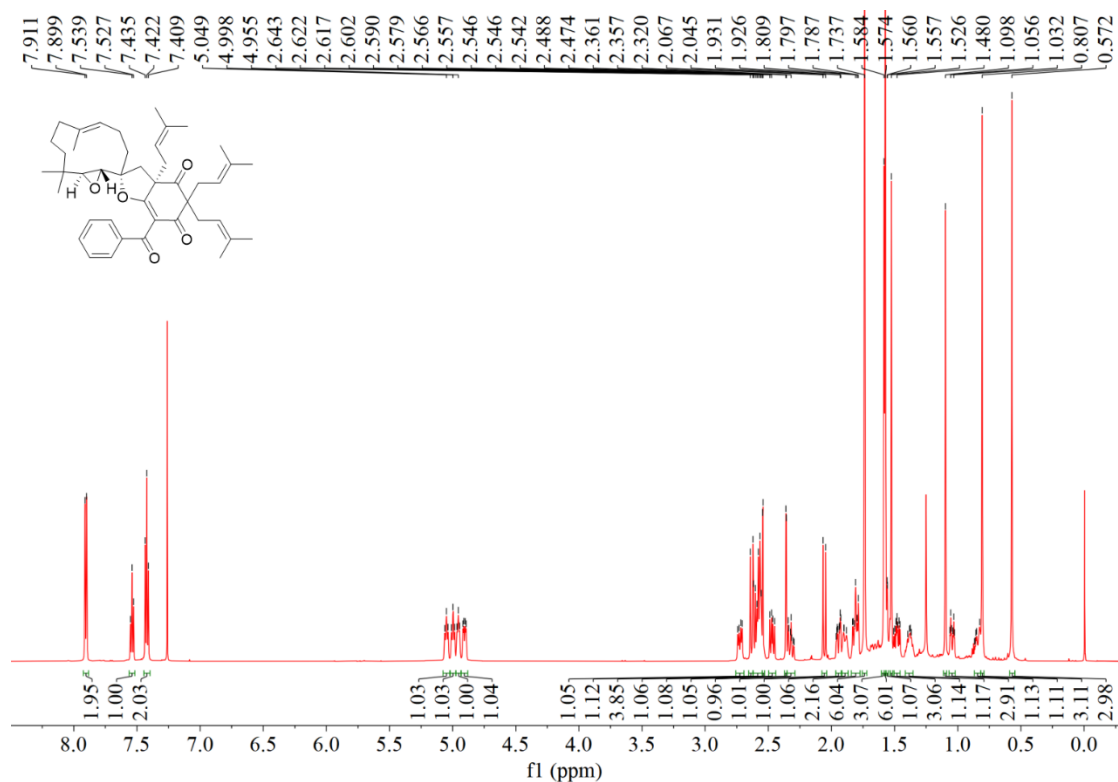

**Fig. S70.**  $^1\text{H}$  NMR (600 MHz,  $\text{CDCl}_3$ ) spectrum of hyperkouytin F (**6**).

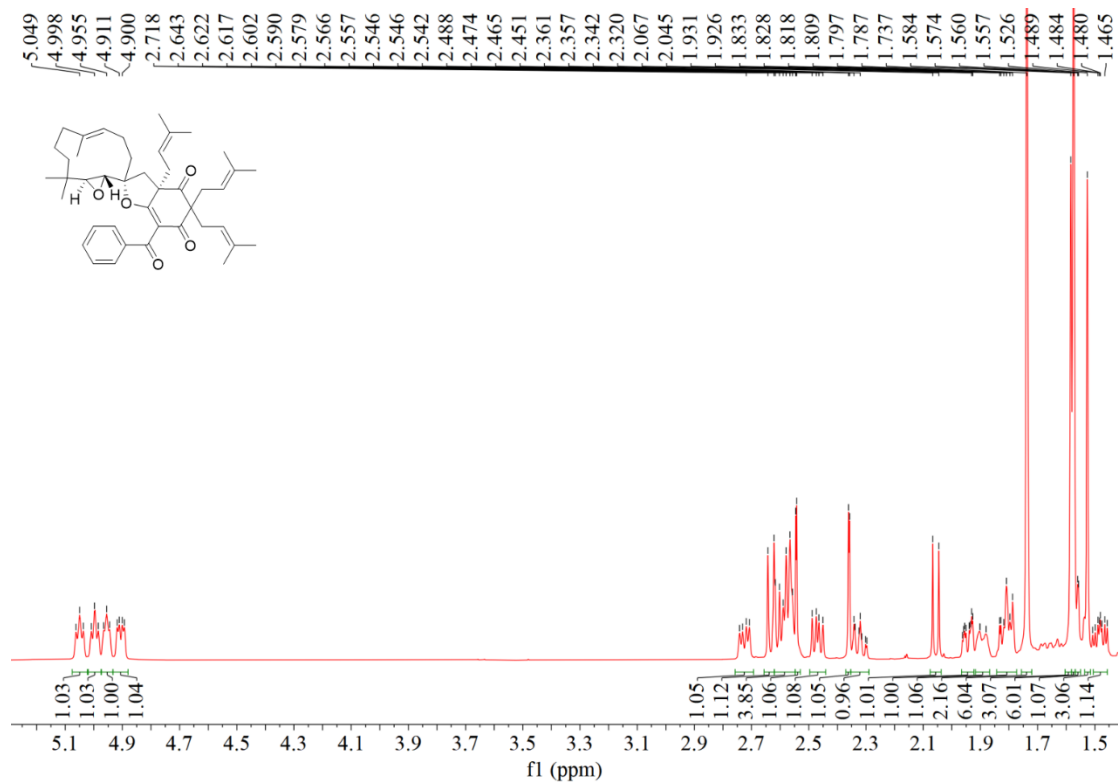

**Fig. S71.**  $^{13}\text{C}$  NMR and DEPT (150 MHz,  $\text{CDCl}_3$ ) spectra of hyperkouytin F (6).

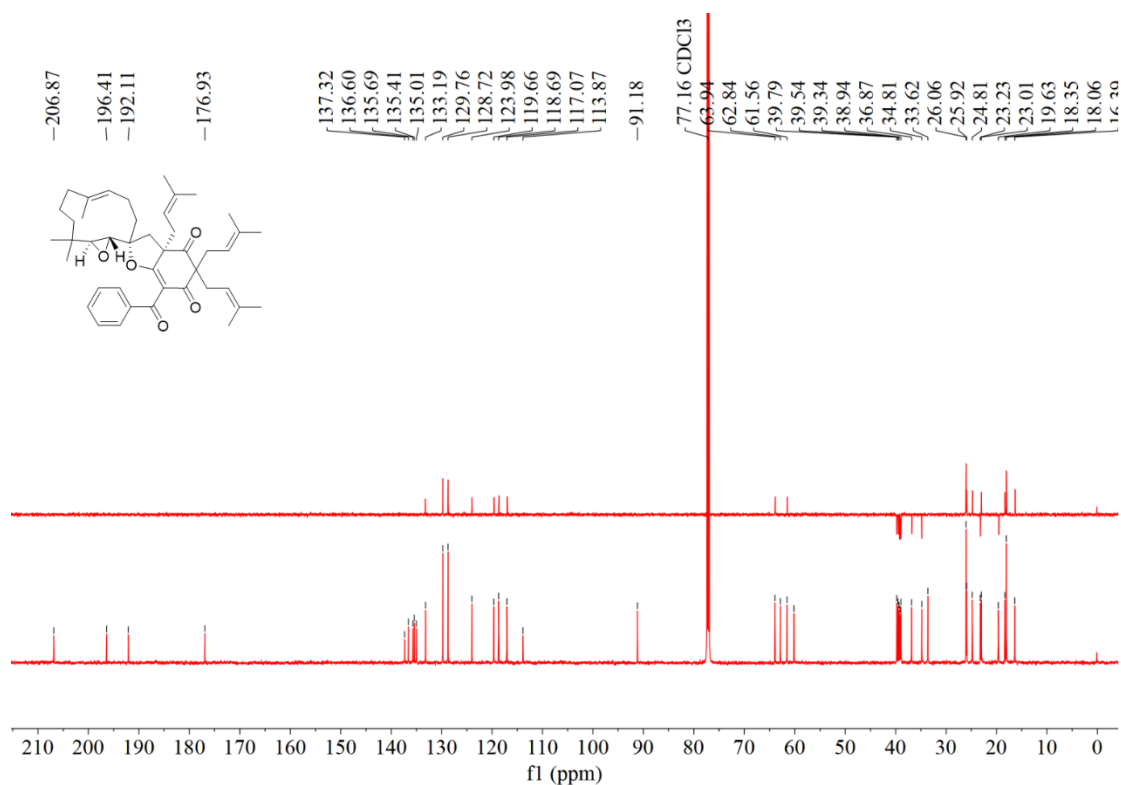

**Fig. S72.**  $^{13}\text{C}$  NMR and DEPT (150 MHz,  $\text{CDCl}_3$ ) spectra of hyperkouytin F (6).

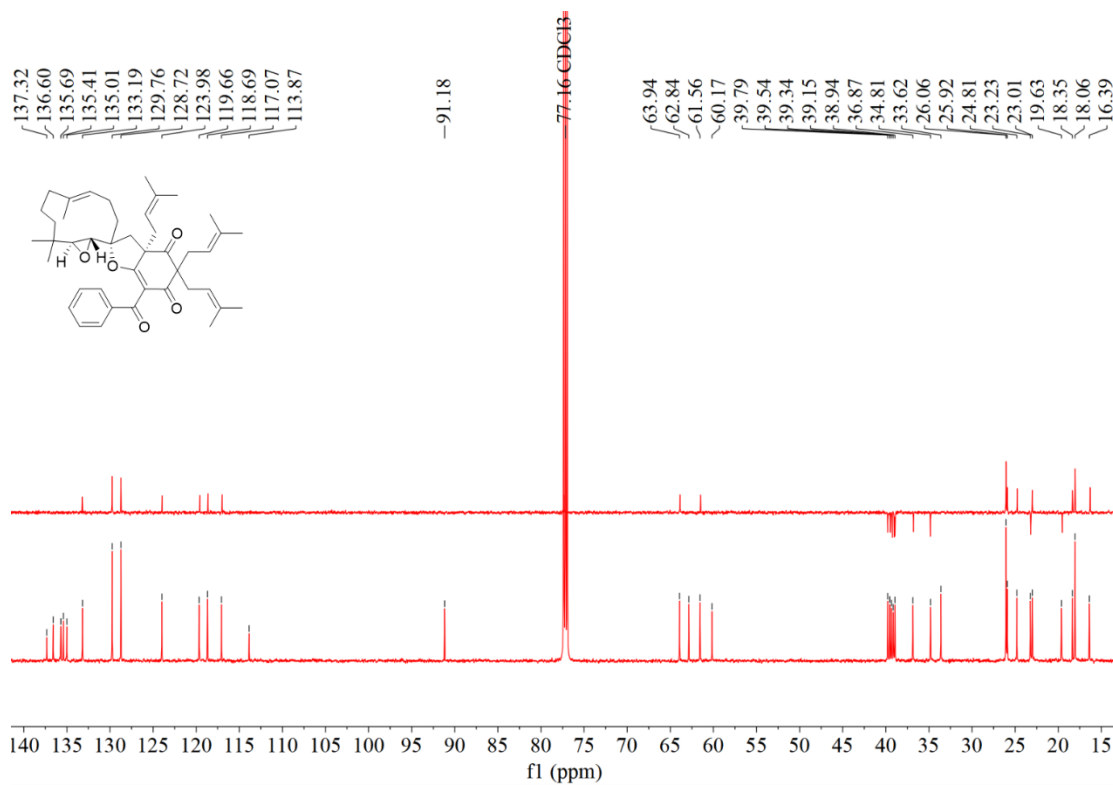

**Fig. S73.** HSQC (600 MHz, CDCl<sub>3</sub>) spectrum of hyperkouytin F (**6**).

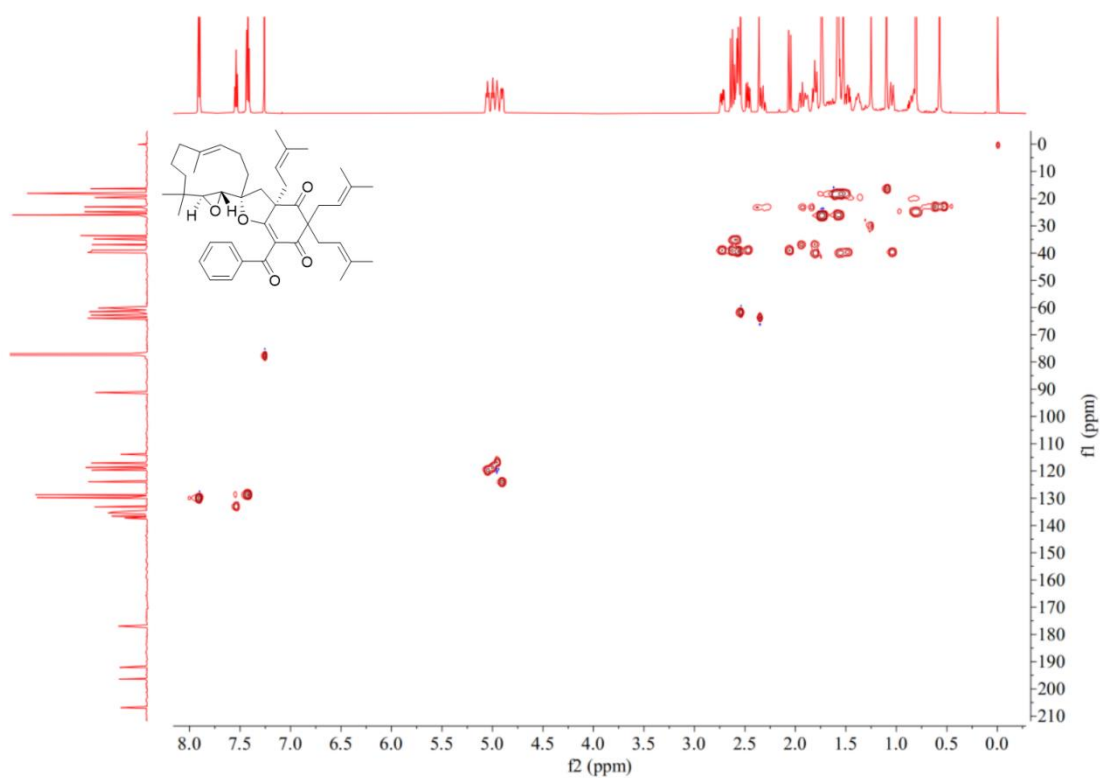

**Fig. S74.** HSQC (600 MHz, CDCl<sub>3</sub>) spectrum of hyperkouytin F (**6**).

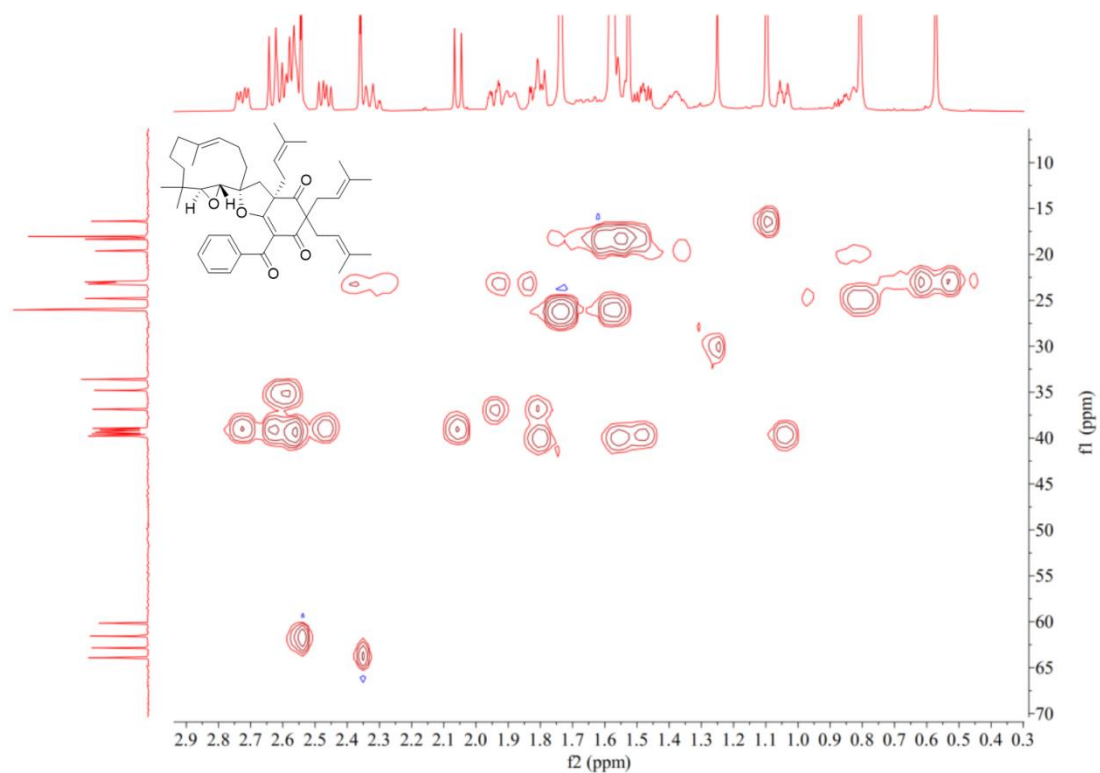

**Fig. S75.**  $^1\text{H}$ - $^1\text{H}$  COSY (600 MHz,  $\text{CDCl}_3$ ) spectrum of hyperkouytin F (**6**).

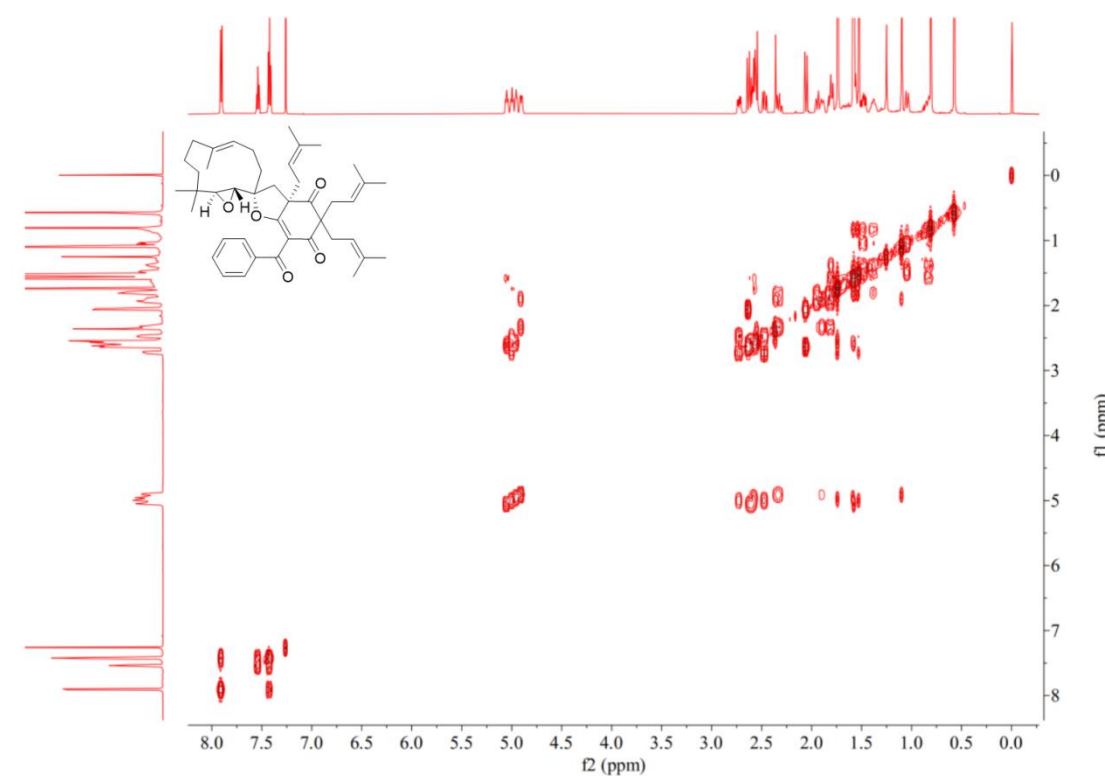

**Fig. S76.** HMBC (600 MHz,  $\text{CDCl}_3$ ) spectrum of hyperkouytin F (**6**).

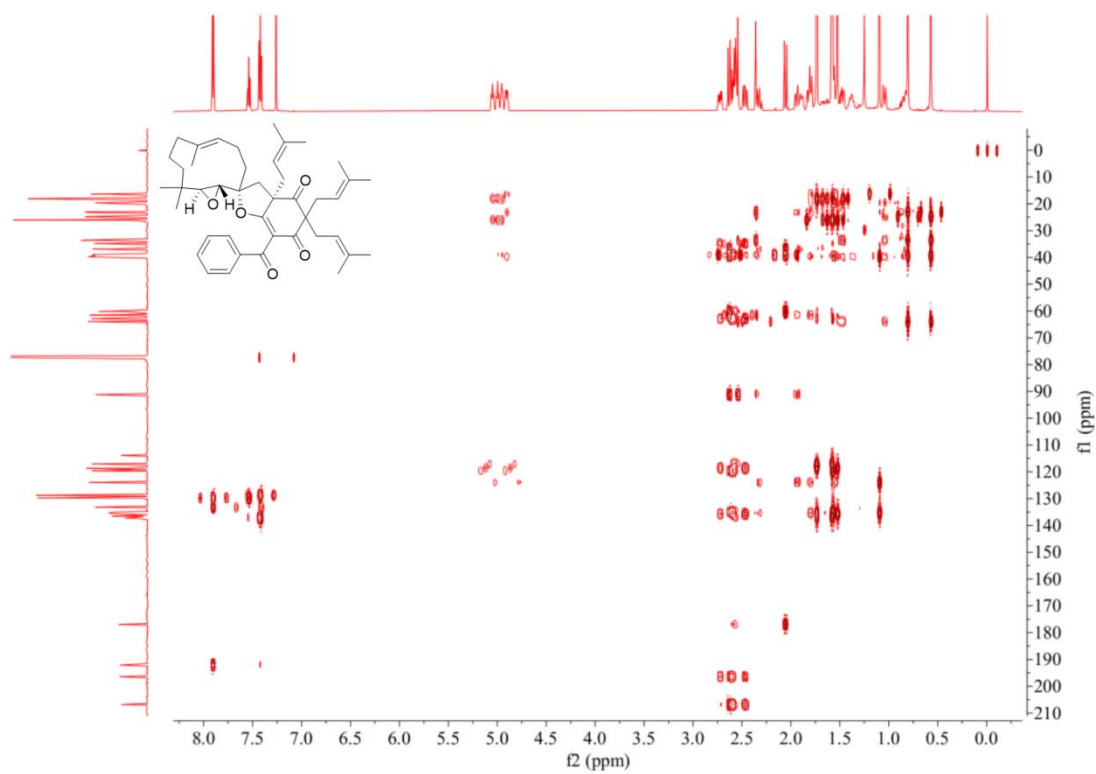



**Fig. S77.** HMBC (600 MHz, CDCl<sub>3</sub>) spectrum of hyperkouytin F (**6**).

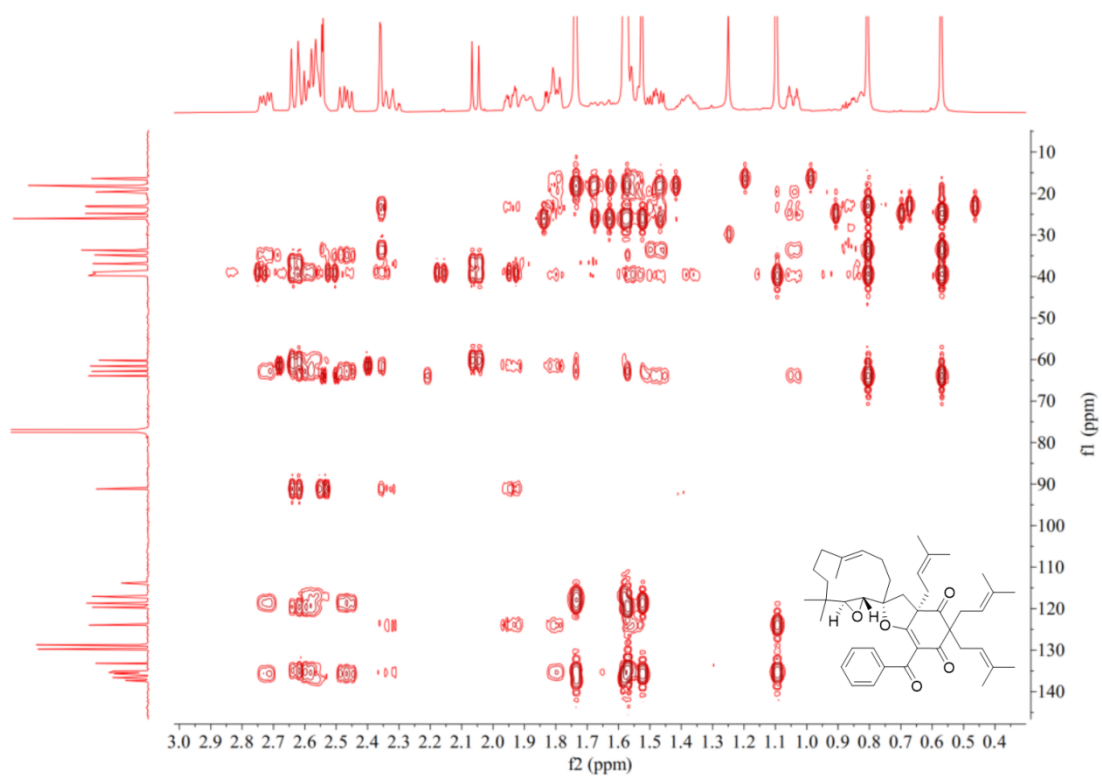

**Fig. S78.** NOESY (600 MHz, CDCl<sub>3</sub>) spectrum of hyperkouytin F (**6**).

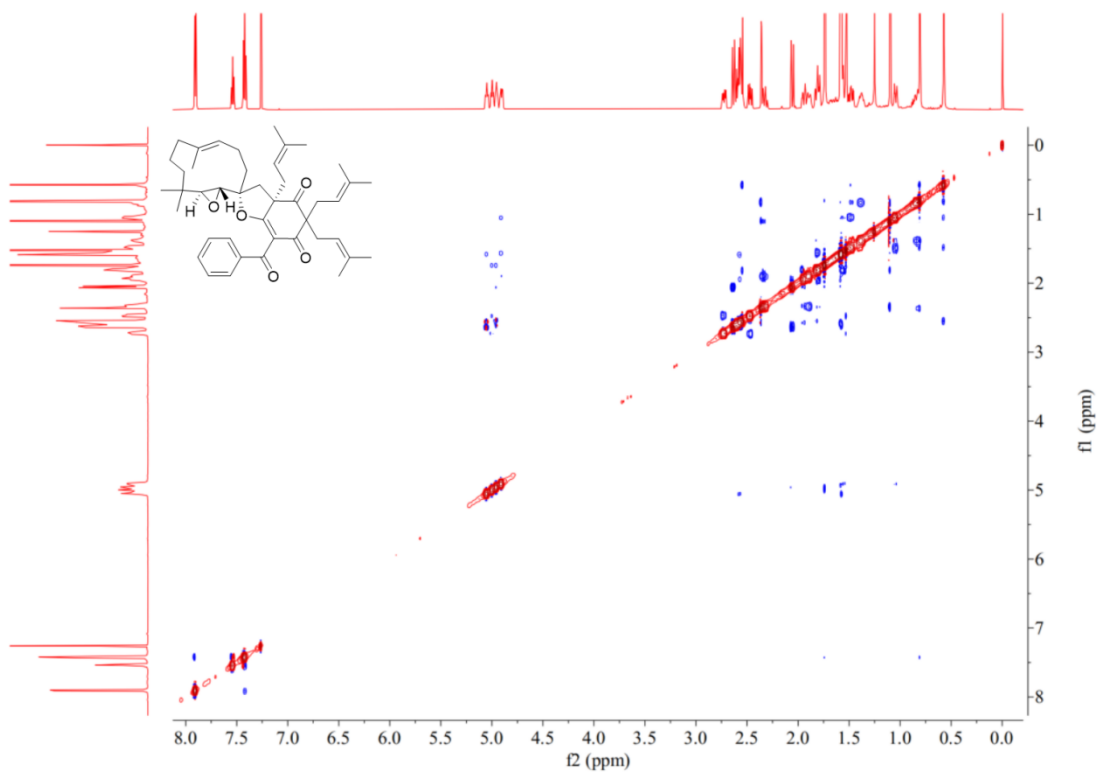

**Fig. S79.** IR spectrum of hyperkouyitin F (6).

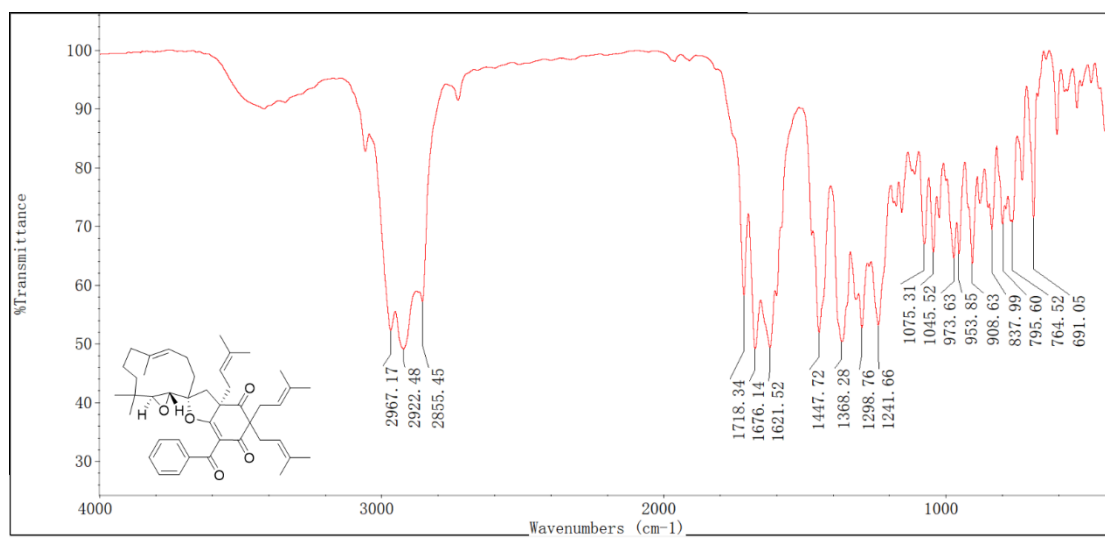

**Fig. S80.** UV spectrum of hyperkouyitin F (6).

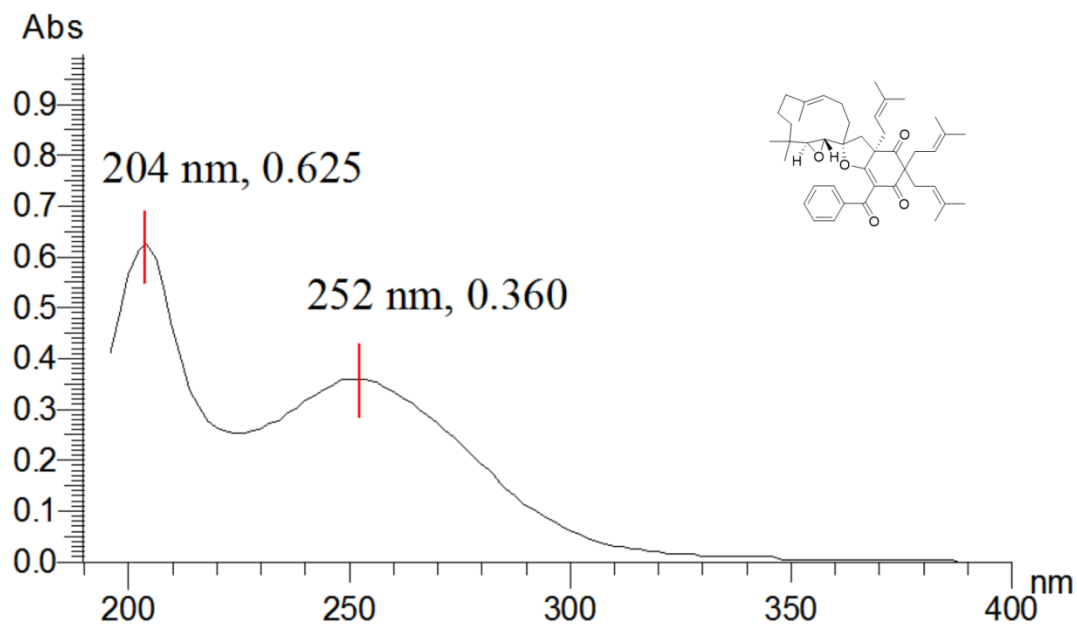

Supplement: d2qo01485h1.pdf [file d2qo01485h1.pdf]
